## 1 **Title page**

### 2 ***Title***

3 Performance evaluation of RNA purification kits and blood collection tubes in the Extracellular  
4 RNA Quality Control (exRNAQC) study

5

### 6 **Authors**

7 The exRNAQC Consortium\*

8

9 \*A list of authors and their affiliations is available in the Author contributions section.

10

### 11 **Corresponding authors**

12 Pieter Mestdagh (pieter.mestdagh@ugent.be) and Jo Vandesompele  
13 (jo.vandesompele@ugent.be)

14 OncoRNALab, Medical Research Building 1, campus UZ Gent, Corneel Heymanslaan 10,  
15 Ghent, Belgium

16 Tel +32 9 332 6979

17

### 18 **Abbreviations**

19 ACD-A: BD Vacutainer Glass ACD Solution A tube; ALC: area left of the curve; Biomatrix:

20 LBgard Blood Tube; BRISQ: Biospecimen Reporting for Improved Study Quality; bp: base pair;

21 CCF: QIAamp ccfDNA/RNA Kit; cfRNA: cell-free RNA; CIRC: Plasma/Serum Circulating and

22 Exosomal RNA Purification Kit/Slurry Format; circRNA: circular RNA; Citrate: Vacuette Tube

23 9 ml 9NC Coagulation sodium citrate 3.2%; DNA Streck: Cell-Free DNA BCT; EDTA: BD

24 Vacutainer Plastic K2EDTA tube; EDTA separator: Vacuette Tube 8 ml K2E K2EDTA

25 Separator; EGA: European Phenome-Genome Archive; ERCC: Extracellular RNA

26 Communication Consortium; exRNA: extracellular RNA; FC: fold change; gDNA: genomic

27 DNA; LP: Library Prep Control; MAP: MagNA Pure 24 Total NA Isolation Kit in combination

28 with the MagNA Pure instrument; MAX: Maxwell RSC miRNA Plasma and Exosome Kit in  
29 combination with the Maxwell RSC Instrument; MIR: miRNeasy Serum/Plasma Kit; MIRA:  
30 miRNeasy Serum/Plasma Advanced Kit; miRNA: microRNA; MIRV: mirVana PARIS Kit with  
31 purification protocol for total RNA; MIRVE: mirVana PARIS Kit with purification protocol for  
32 RNA enriched for small RNAs; mRNA: messenger RNA; NUC: NucleoSpin miRNA Plasma Kit;  
33 PAXgene: PAXgene Blood ccfDNA Tube; RA3: RNA 3' adapter; RA5: RNA 5' adapter; RC:  
34 RNA extraction Control; RNA Streck: Cell-Free RNA BCT; Roche: Cell-Free DNA Collection  
35 Tube; Serum: BD Vacutainer SST II Advance Tube; SOP: standard operating procedure.

36

## 37 **Keywords**

38 Extracellular RNA (exRNA), cell-free RNA (cfRNA), pre-analytical variables, blood collection  
39 tube, RNA purification, mRNA capture sequencing, small RNA sequencing

40

## 41 **Abstract**

42 The use of blood-based extracellular RNA (cell-free RNA; exRNA) as clinical biomarker  
43 requires the implementation of a validated procedure for sample collection, processing, and  
44 profiling. So far, no study has systematically addressed the pre-analytical variables affecting  
45 transcriptome analysis of exRNAs. In the exRNAQC study, we evaluated ten blood collection  
46 tubes, three time intervals between blood draw and downstream processing, and eight RNA  
47 purification methods using the supplier-specified minimum and maximum biofluid input  
48 volumes. The impact of these pre-analytics on deep transcriptome profiling of both small and  
49 messenger RNA from healthy donors' plasma or serum was assessed for each pre-analytical  
50 variable separately and for interactions between a selected set of pre-analytics, resulting in  
51 456 extracellular transcriptomes. Making use of 189 synthetic spike-in RNAs, the processing  
52 and analysis workflow was controlled. When comparing blood collection tubes, so-called  
53 preservation tubes do not stabilize exRNA well, and result in variable RNA concentration and  
54 sensitivity (i.e., the number of detected RNAs) over time, as well as compromised

55 reproducibility. We also document large differences in RNA purification kit performance in  
56 terms of sensitivity, reproducibility, and observed transcriptome complexity, and demonstrate  
57 interactions between specific blood collection tubes, purification kits and time intervals. Our  
58 results are summarized in 11 performance metrics that enable an informed selection of the  
59 most optimal sample processing workflow for a given experiment. In conclusion, we put forward  
60 robust quality control metrics for exRNA quantification methods with validated standard  
61 operating procedures (SOPs), representing paramount groundwork for future exRNA-based  
62 precision medicine applications.

63

## 64 **Main**

65 Biomarker studies are increasingly utilizing biofluids as an attractive resource of molecules  
66 reflecting human health or disease states. Biopsies from those human body fluids are often  
67 referred to as ‘liquid biopsies’. In contrast to tissue biopsies, they have the advantage of being  
68 minimally invasive and are compatible with serial profiling, enabling to monitor the impact of  
69 an intervention (e.g., treatment, physical exercise) over time.

70 Most liquid biopsy biomarker studies focus on cell-free nucleic acids as candidate biomarkers.  
71 While cell-free DNA has been studied intensively and found its way in daily clinical practice for  
72 non-invasive prenatal testing<sup>1</sup>, as well as for mutation and methylation detection in cancer<sup>2</sup>,  
73 extracellular RNA (exRNA) is relatively new in the biomarker field. Nevertheless, biomarker  
74 potential has been ascribed to various RNA molecules, including microRNA (miRNA),  
75 messenger RNA (mRNA), long-non-coding RNA and circular RNA (circRNA) in several  
76 diseases such as cancer, autoimmune diseases, diabetes, and cardiovascular diseases<sup>3-7</sup>.  
77 Given the labile nature of RNA and the release of exRNA and cellular RNA by cells under  
78 stress<sup>8,9</sup>, the growing interest in exRNA as a biomarker resource requires the strict  
79 implementation of standardized methods for sample collection, processing and molecular  
80 profiling. Blood serum and plasma are amongst the most studied liquid biopsies and several  
81 pre-analytical variables, including blood collection tube type, needle type and blood

82 centrifugation speed and duration, are known to influence exRNA abundance patterns  
83 (Supplementary Table 1)<sup>10-12</sup>. Over time, several consortia were founded with the aim to  
84 standardize some of these pre-analytical variables, including the NIH's Extracellular RNA  
85 Communication Consortium (ERCC)<sup>13,14</sup>, Blood Profiling Atlas in Cancer (BloodPAC)  
86 Consortium ([www.bloodpac.org](http://www.bloodpac.org))<sup>15,16</sup>, SPIDIA/SPIDIA4P ([www.spidia.eu](http://www.spidia.eu)) and CANCER-ID  
87 ([www.cancer-id.eu](http://www.cancer-id.eu)). Nevertheless, pre-analytical variables are typically not reported in studies,  
88 as demonstrated by a recent literature review conducted by our group (Van Der Schueren et  
89 al., manuscript in preparation). Out of 22 studied pre-analytical variables (including the blood  
90 collection tube anticoagulant, plasma storage temperature, RNA purification method and  
91 plasma input volume for RNA purification), only 6 were sufficiently detailed in more than half  
92 of the 100 exRNA publications that were reviewed (Van Der Schueren et al., manuscript in  
93 preparation). This makes it challenging to replicate findings or directly compare biomarker  
94 studies.

95  
96 While it is well recognized that pre-analytical variables need to be considered when studying  
97 exRNA biomarkers, studies investigating their impact are either focused on microRNAs or are  
98 restricted to a limited number of mRNA genes (Supplementary Table 1), and generally do not  
99 investigate interactions between pre-analytics. In the Extracellular RNA Quality Control  
100 (exRNAQC) study, we performed an extensive massively parallel sequencing-based analysis  
101 of the impact of pre-analytical variables on both extracellular small RNA and mRNA profiles.  
102 We systematically evaluated ten blood collection tubes, three time intervals between blood  
103 draw and downstream processing, and eight RNA purification methods using the supplier  
104 specified minimum and maximum plasma input volumes. The impact of these pre-analytical  
105 factors was firmly established using deep transcriptome profiling of all small and messenger  
106 RNAs from healthy donors' plasma or serum, and was assessed by evaluating each of the pre-  
107 analytics separately (exRNAQC phase 1), as well as by analyzing interactions between pre-  
108 analytics (exRNAQC phase 2). Synthetic spike-in RNAs were added during and after RNA  
109 purification and a wide variety of (novel) performance metrics were introduced and evaluated

110 (Fig. 1). Such a comprehensive analysis of pre-analytical variables in the context of exRNA  
111 profiling has not yet been performed (Supplementary Fig. 1).

112

## 113 **Results**

114

### 115 **RNA purification methods influence miRNA and mRNA abundance profiles**

116 In the first phase of the exRNAQC study, eight total RNA purification methods were selected  
117 for evaluation (Fig. 1): the miRNeasy Serum/Plasma Kit (abbreviated to MIR), miRNeasy  
118 Serum/Plasma Advanced Kit (MIRA), mirVana PARIS Kit (MIRV), NucleoSpin miRNA Plasma  
119 Kit (NUC), QIAamp ccfDNA/RNA Kit (CCF), Plasma/Serum Circulating and Exosomal RNA  
120 Purification Kit/Slurry Format (CIRC), Maxwell RSC miRNA Plasma and Exosome Kit in  
121 combination with the Maxwell RSC Instrument (MAX), and MagNA Pure 24 Total NA Isolation  
122 Kit in combination with the MagNA Pure instrument (MAP). Since most methods allow a range  
123 of blood plasma input volumes, we tested both the minimum and maximum input volume  
124 recommended by each supplier (indicated in ml following the RNA purification method  
125 abbreviation). For the mirVana PARIS Kit, also an alternative protocol for specific enrichment  
126 of small RNAs (MIRVE) was tested for small RNA purification. Blood was collected (in EDTA  
127 tubes) from a healthy donor and three technical replicates were used for every kit-plasma input  
128 volume combination, resulting in 45 and 51 samples that were processed for RNA extraction  
129 and mRNA capture or small RNA sequencing library preparation, respectively.

130 We first investigated potential DNA contamination in the RNA eluates using the strandedness  
131 of the mRNA capture sequencing data as a proxy. As we applied a stranded sequencing library  
132 preparation protocol, strandedness should be close to 100% in the absence of DNA  
133 contamination. Strandedness for libraries from MAP purified RNA, however, was considerably  
134 lower: only 70-75% and 80-85% of reads mapped to the correct strand for MAP2 and MAP4  
135 purification, respectively, while this percentage was above 95% for all other purification  
136 methods (Supplementary Fig. 2c). Moreover, the small RNA sequencing data from MAP

137 contained a much higher fraction of mapped reads that did not overlap annotated small RNA  
138 sequences (35 to 52% of mapped reads for MAP compared to only 1 to 6% for other purification  
139 kits) and more than 80% of these unannotated reads did not overlap with known exons. Despite  
140 DNase treatment, these findings strongly suggest residual DNA contamination in MAP RNA  
141 eluates and we therefore excluded this purification method from all further analyses.

142 To evaluate performance differences among RNA purification methods, we calculated nine  
143 purposely developed metrics (see Methods and Table 1): (1) sensitivity, (2) RNA  
144 concentration, (3) RNA yield, (4) extraction efficiency, (5) count threshold, (6) data retention,  
145 (7) reproducibility, (8) duplication rate, and (9) coverage (see Methods for a detailed  
146 description of each individual metric; the last two metrics were only evaluated for the mRNA  
147 data). In terms of **sensitivity**, the absolute number of mRNAs and miRNAs detected ranged  
148 from 989 to 11,322 and from 69 to 171, respectively. While a higher plasma input volume  
149 consistently resulted in a higher number of detected mRNAs for a given method (Fig. 2a & b),  
150 this was not always true when comparing different methods e.g., MIRA0.6 (7424 mRNAs on  
151 average, 0.6 ml) versus NUC0.9 (4766 mRNAs on average, 0.9 ml); Fig. 2a). This also holds  
152 true for miRNAs, except for CCF, CIRC and NUC (Fig. 2b). To compare the eluate **RNA**  
153 **concentration** of the different RNA purification methods, the ratio of endogenous counts  
154 versus ERCC spikes counts (for mRNA capture sequencing) and endogenous counts versus  
155 LP spikes counts (for small RNA sequencing) were determined. This sequencing-based RNA  
156 concentration metric correlates significantly with RNA concentrations determined by Femto  
157 Pulse electropherogram analysis ( $p$ -value < 0.001, Spearman correlation coefficient of 0.67 for  
158 mRNA capture sequencing and 0.86 for small RNA sequencing, Supplementary Fig. 3a & b,  
159 respectively). Femto Pulse analyses further demonstrate that blood-derived exRNA is highly  
160 fragmented (Supplementary Fig. 4). The purification method resulting in the highest mRNA  
161 concentration (CCF4) had on average a 76 times higher eluate concentration than the kit with  
162 the lowest concentration (MIRV0.1) (Fig. 2c). For miRNAs, the difference was even larger, with  
163 a 238 times higher concentration in CCF4 compared to MIRVE0.1 (Fig. 2d). When excluding  
164 MIRVE, a kit not tested at mRNA level, the difference between the kit with the highest and

165 lowest miRNA concentration was 29-fold. The **RNA yield** metric represents the relative amount  
166 of RNA in the total eluate volume after purification. For mRNA capture sequencing, there was  
167 on average a 30-fold difference between the kit with the highest RNA yield (CIRC5) compared  
168 to the kit with the lowest RNA yield (NUC0.3) (Supplementary Fig. 5e). For small RNA  
169 sequencing, there was on average an 85-fold difference between the kit with the highest RNA  
170 yield (MAX0.5) compared to the kit with the lowest RNA yield (MIRVE0.1) (Supplementary Fig.  
171 5f). **Extraction efficiency** is a performance metric that, besides RNA yield, also takes into  
172 account differences in plasma input volume for RNA purification. It is a relative measure of how  
173 well a certain kit purifies RNA from the applied plasma input volume. When looking at the  
174 extracellular mRNA transcriptome, the highest average extraction efficiency (MAX0.1) was ten  
175 times higher than the lowest (MIRV0.1) (Supplementary Fig. 5g). For small RNAs, the highest  
176 average extraction efficiency (MAX0.1) was 25 times higher than the lowest (MIRV0.625)  
177 (Supplementary Fig. 5h). Of note we did not observe differences in extraction efficiency  
178 between the maximum and minimum input volume for a given kit. For each purification kit, we  
179 further determined a **count threshold** to filter noisy data based on eliminating 95% of single  
180 positive observations between technical replicates. Higher count thresholds indicate higher  
181 variability. This threshold varied from 5 to 14 counts at mRNA level for CCF4 and MIRV0.1,  
182 respectively, and from 2 to 16 counts at miRNA level for MIRA0.6 and MIRVE0.1, respectively  
183 (Supplementary Fig. 5a & b; Supplementary Table 2). A related performance metric, **data**  
184 **retention**, represents the fraction of total counts that are retained after applying the count  
185 threshold. For mRNA capture sequencing, data retention ranged from an average of 93.5% in  
186 MIRV0.1 to an average of 99.7% in CCF4 (Supplementary Fig. 5c). For small RNA sequencing,  
187 data retention ranged from an average of 98.8% in MIRVE0.1 to an average of 99.8% in  
188 MAX0.5 (Supplementary Fig. 5d). To assess **reproducibility**, we determined the area left of  
189 the curve (ALC), a robust metric based on differences in mRNA or miRNA counts between  
190 technical replicates (as defined in the miRQC study<sup>17</sup>, see Methods). The higher the  
191 reproducibility, the lower the ALC value. Most kits performed equally well with respect to  
192 miRNA count reproducibility (Fig. 2f) except for MIRVE0.1. For mRNA, CIRC0.25 and MIRV0.1

193 displayed a lower reproducibility than the other kits, while CCF4 had the best reproducibility,  
194 closely followed by CIRC5 and MIR0.2 (Fig. 2e). Within a kit, the maximum plasma input  
195 volume consistently resulted in a better reproducibility compared to the minimum plasma input  
196 volume. A low amount of input RNA, as is the case for biofluids, typically results in mRNA  
197 capture sequencing libraries with a high fraction of PCR duplicates. The average **duplication**  
198 **rate** ranged from 82.2% (CCF4) to 97.3% (NUC0.3) of mRNA capture sequencing reads (lower  
199 is better, Supplementary Fig. 2a). Note that even a small difference in duplication rate can  
200 have a high impact on the total number of non-duplicated reads: with CCF4, on average six  
201 times more non-duplicated reads were generated compared to NUC0.3 (Supplementary Table  
202 3). Finally, transcriptome **coverage** was determined to assess the diversity of mRNA capture  
203 sequencing reads. The MIRV0.1 kit had the lowest average coverage: only 1.8% of the human  
204 Ensemble v91 transcriptome was covered by at least one sequencing read. Purification with  
205 CCF4 resulted in the highest average coverage (17.7%, Supplementary Fig. 2b).

206 A summary plot of all performance metrics after robust z-score transformation is shown in Fig.  
207 2g & h, for mRNA and small RNA, respectively. For each metric, a higher z-score indicates a  
208 better performance. In general, kit differences are smaller for miRNA than for mRNA (less  
209 variability in z-score). For mRNA capture sequencing, kits with a higher plasma input volume,  
210 such as CIRC5 and CCF4, scored better on most performance metrics. Kits with plasma input  
211 volumes below 0.5 ml were in general less performant than other kits, except for MIR0.2.  
212 Despite lower performance scores, MAX0.1 and MIRV0.1 were efficient in purifying RNA from  
213 the given 0.1 ml of plasma. Of note, plasma input volume alone does not completely determine  
214 performance as some kits with a lower plasma input volume (for example MIRA0.6 and CCF1)  
215 still perform better than kits with a higher input. Similarly, for small RNAs, we mainly observe  
216 low performance in the lower input volume kits, but there were also exceptions. MAX0.5 and  
217 MIRA0.6, for example, scored surprisingly well or even better compared to kits with a much  
218 larger plasma input volume such as CIRC5 and CCF4. In contrast to mRNA capture  
219 sequencing, more plasma input for a given kit did not always result in better small RNA  
220 sequencing performance (see CIRC5 vs CIRC0.25).



221

## 222 **Blood preservation tubes are not suitable for exRNA analysis**

223 In addition to RNA purification methods, different blood collection tubes and processing time  
224 intervals were evaluated in exRNAQC phase 1. Ten blood collection tubes were selected,  
225 belonging to two categories: tubes not designed to stabilize nucleic acids (which we termed  
226 'non-preservation tubes'; n = 5), and so-called 'preservation tubes' (n = 5) that are purposely  
227 developed to conveniently allow more time between the blood draw and further processing  
228 steps. The selected non-preservation tubes were the BD Vacutainer Plastic K2EDTA tube  
229 (abbreviated to EDTA), Vacuette Tube 8 ml K2E K2EDTA Separator (EDTA separator), BD  
230 Vacutainer Glass ACD Solution A tube (ACD-A), Vacuette Tube 9 ml 9NC Coagulation sodium  
231 citrate 3.2% (Citrate), and BD Vacutainer SST II Advance Tube (Serum). The preservation  
232 tubes were the Cell-Free RNA BCT (RNA Streck), Cell-Free DNA BCT (DNA Streck), PAXgene  
233 Blood ccfDNA Tube (PAXgene), Cell-Free DNA Collection Tube (Roche) and LBgard Blood  
234 Tube (Biomatrix). For each of the blood collection tubes, we recruited three healthy volunteers  
235 and selected three time intervals between blood draw and processing: immediately (T0), time  
236 interval 1 (4 hours (T04) for non-preservation tubes, 24 hours (T24) for preservation tubes),  
237 and time interval 2 (16 hours (T16) for non-preservation tubes and 72 hours (T72) for  
238 preservation tubes). This resulted in a total of 180 samples that were subsequently processed  
239 for RNA purification (using MIR0.2) and mRNA capture or small RNA sequencing.

240 To evaluate exRNA profiles between tubes and over time, we calculated five different  
241 performance metrics: (1) hemolysis, (2) RNA concentration, (3) sensitivity, (4) biotype, and (5)  
242 reproducibility (see Methods and Table 1). The stability of each performance metric over time  
243 was evaluated as a fold change between the first (T0) and the second (T04 or T16) or third  
244 time interval (T16 or T72), subsequently, as exemplified in Supplementary Fig. 6. If the  
245 processing time interval has no impact on any of the above-described metrics, respective fold  
246 changes should be close to one. For each blood collection tube, the average fold change of  
247 each performance metric over time is shown in Fig. 3. **Hemolysis** was quantified based on  
248 absorbance units at 414 nm and evaluated by visual inspection during liquid biopsy

249 preparation. For the non-preservation tubes, hemolysis measurements were below the  
250 generally accepted absorbance threshold of 0.2<sup>18,19</sup> across all donors and time intervals  
251 (Supplementary Fig. 7a, Supplementary Fig. 8a and Supplementary Fig. 9). In contrast, for all  
252 preservation tubes except the Biomatrix tube, plasma was hemolytic for at least one donor at  
253 T0. At T72, the Biomatrix hemolysis measurements also exceeded the 0.2 threshold. Despite  
254 the low absorbance values, we did observe up to two-fold differences in function of time: mean  
255 fold changes in non-preservation tubes ranged from 1.05 to 2.04, and in preservation tubes  
256 from 1.19 to 2.08 (Supplementary Fig. 10a & Supplementary Fig. 11a). To assess **RNA**  
257 **concentration** differences in plasma prepared from the different blood collection tubes, ratios  
258 of endogenous counts versus Sequin spikes counts (for mRNA capture sequencing) and  
259 endogenous counts versus RC spikes counts (for small RNA capture sequencing) were  
260 calculated. RNA concentration in non-preservation tubes remained quite stable over time, with  
261 a 1.23 to 1.48 fold increase in mRNA mass and a 1.57 to 2.97 fold increase in miRNA mass  
262 (Supplementary Fig. 10b & Supplementary Fig. 11b). Unexpectedly, RNA concentration was  
263 much less stable in preservation tubes with fold changes of 1.84 to 4.03 and 1.75 to 10.50 for  
264 mRNA and small RNA, respectively. While RNA concentration did not change substantially  
265 between time intervals for the RNA Streck tubes, the RNA concentration at the individual time  
266 intervals for these tubes was substantially lower compared to the other tubes (on average 4.97-  
267 fold lower for mRNA and 10.36-fold lower for small RNA (Supplementary Fig. 7b &  
268 Supplementary Fig. 8b)). The **sensitivity** (i.e., the absolute number of mRNAs and miRNAs)  
269 in non-preservation tubes remained relatively constant over time: mean fold changes ranged  
270 from 1.29 to 1.59 and from 1.10 to 1.36 at mRNA and small RNA sequencing level,  
271 respectively. In preservation tubes, the mean fold change ranged from 1.86 to 4.01 and from  
272 1.08 to 1.67 for mRNA and miRNA, respectively (Supplementary Fig. 10c & Supplementary  
273 Fig. 11c). Furthermore, and similar to the RNA concentration, the sensitivity was substantially  
274 lower in DNA Streck and RNA Streck tubes compared to the others (mean number of mRNAs:  
275 385 for RNA Streck and 840 for DNA Streck; mean number of miRNAs: 60 for RNA Streck and  
276 103 for DNA Streck) (Supplementary Fig. 7c & Supplementary Fig. 8c). The fraction of total

277 counts mapping to mRNAs and miRNAs (Supplementary Fig. 7d & Supplementary Fig. 8d),  
278 referred to as the **biotype** performance metric, in non-preservation tubes remained fairly  
279 constant over time: mean fold changes ranged from 1.08 to 1.14 and from 1.13 to 1.47, for  
280 mRNA and miRNA, respectively. For the preservation tubes, the mean fold changes were  
281 higher: from 1.69 to 2.28 and from 1.38 to 4.52, for mRNA and miRNA, respectively  
282 (Supplementary Fig. 10e & Supplementary Fig. 11e). **Reproducibility** remained stable over  
283 time for both preservation and non-preservation tubes: mean fold changes ranged from 1.06  
284 to 1.18 (Supplementary Fig. 10d & Supplementary Fig. 11d). In general, the stability of the  
285 performance metrics over time was substantially better for the non-preservation tubes  
286 compared to the preservation tubes (Fig. 3).

287

288 Tubes were further evaluated by determining the circRNA and linear RNA fractions at the  
289 different time intervals for each of the tubes separately, as well as by comparing RNA  
290 abundance levels across tubes (at T0) and time intervals, and by evaluating differences in  
291 immune cell RNA contributions over time. Fractions of circRNA and linear RNA do not  
292 significantly differ across time intervals (pairwise comparisons using Wilcoxon Rank Sum test  
293 with Holm-Bonferroni adjustment, all adjusted p-values > 0.05; Supplementary Fig. 12). After  
294 normalization and scaling of the count data, transcript abundance levels of all genes for the  
295 different tubes at time interval T0 were compared and visualized in a heatmap (Supplementary  
296 Fig. 13). The Roche, Biomatrix and RNA Streck tubes cluster separately from the other tubes.  
297 To assess tube stability across time intervals, distributions of log<sub>2</sub> fold change differences  
298 between time interval 1 (T04 or T24) and 0 versus time interval 2 (T16 or T72) and 0 were  
299 compared and GSEA was performed (Supplementary Table 4). Clearly, preservation tubes  
300 show higher log<sub>2</sub> fold change differences compared to non-preservation tubes, but also non-  
301 preservation tubes have, although less outspoken, higher log<sub>2</sub> fold changes at the second time  
302 interval compared to the first one (Supplementary Fig. 14a and Supplementary Table 4). Non-  
303 preservation tubes that do not show significantly enriched gene sets when processed within  
304 four hours upon blood draw are EDTA and Citrate (Supplementary Table 4). Computational

305 deconvolution of exRNA profiles (see Methods) revealed that the estimated proportions of  
306 several cell types change over time, in a tube-dependent manner (Fig. 4). Remarkably, Serum,  
307 Citrate and ACD-A seem to maintain a stable immune cell composition over time. Note that, in  
308 contrast to Serum, Citrate and ACD-A show no significant changes if blood processing is  
309 performed within four hours upon blood draw.

310

### 311 **Interactions between pre-analytics should be considered when comparing kit or tube** 312 **performance**

313 In the second phase of the exRNAQC study, we evaluated if performance interactions between  
314 pre-analytic variables exist. More specifically, we evaluated whether the impact of a certain  
315 pre-analytic variable on exRNA sequencing outcome depends on the choice of other pre-  
316 analytical variables. To this purpose, three non-preservation blood collection tubes and two  
317 RNA purification kits were specifically selected for further evaluation (Fig. 1). The tube  
318 selection (Serum, EDTA and Citrate) was based on their superior performance in phase 1 and  
319 on their widespread use in the clinic. The kit selection was based on their sensitivity (Fig. 2a &  
320 b) and reproducibility (Fig. 2e & f) from phase 1 (Supplementary Fig. 15). Plasma input volume  
321 was used as an additional criterion, as we aimed to include at least one kit that requires less  
322 than one milliliter biofluid. Because of the differences in kit performance on mRNA and miRNA  
323 level, MIR0.2 and CCF2 were selected for probing the mRNA transcriptome and MAX0.5 and  
324 MIRA0.6 for the small RNA transcriptome. For evaluation of the different blood collection tube-  
325 kit combinations in exRNAQC phase 2, blood was drawn from five healthy individuals and  
326 processed at three time intervals (immediately (T0), 4 hours (T04) or 16 hours (T16)), resulting  
327 in 180 samples processed for RNA purification and mRNA capture or small RNA sequencing.  
328 Interactions were analyzed using six relevant performance metrics: (1) duplication rate, (2)  
329 RNA concentration, (3) extraction efficiency, (4) sensitivity, (5) reproducibility and (6) biotype.  
330 Significant interactions between pre-analytic variables on mRNA and miRNA level are  
331 summarized in Fig. 5a & b, respectively. For mRNA, the number of detected genes  
332 (**sensitivity**) was significantly lower (adjusted p-value = 0.004) in the Serum tube compared

333 to the other tubes, but only if extracted with CCF2 (Fig. 5c). The Serum tube also resulted in  
334 higher **duplication rates** at time interval T16 when purified with CCF2 (adjusted p-value of  
335 0.048), albeit with small effect sizes (95% for serum and 92/91% for EDTA/citrate). We  
336 observed a significantly higher **RNA concentration** and **extraction efficiency** for the EDTA  
337 tube at time interval T16 compared to other time intervals. In terms of reproducibility, no  
338 significant interactions were observed. Also, between RNA purification kits a clear difference  
339 in plasma RNA concentration was observed, which is unexpected considering that the same  
340 biofluid was used for both kits. This suggests a difference in purification efficiency between  
341 MIR0.2 and CCF2. Apart from the interaction analyses, also RNA abundance analyses and  
342 GSEA across time intervals were performed, and confirmed results from phase 1; for these  
343 selected non-preservation tubes higher log<sub>2</sub> fold changes (log<sub>2</sub> FC) were observed at the  
344 second time interval compared to the first one (Supplementary Fig. 14b and Supplementary  
345 Table 4), except for the Serum-CCF2 combination. Differential genes ( $|\log_2 \text{FC}| > 1$  and  
346 Benjamini-Hochberg adjusted p-value  $< 0.05$ ) were only detected for the T0-T16 comparison  
347 and ranged from 0/6386 genes (Serum-CCF2) to 280/7876 genes (Citrate and EDTA in  
348 combination with CCF2). On the other hand, differential gene sets were observed for both time  
349 interval comparisons, although lower numbers of significant gene set changes (Benjamini-  
350 Hochberg adjusted p-value  $< 0.05$ ) were detected for the T0-T04 comparison (0-17 gene sets)  
351 compared to the T0-T16 comparison (0-92 gene sets). For small RNAs, more significant  
352 interactions were found compared to mRNA. EDTA tubes were found to have significantly  
353 lower **sensitivity** compared to the other tubes (adjusted p-value  $< 0.001$ ), but only if extracted  
354 with MAX0.5. Conversely, when extracted with MIRA0.6, Citrate was the tube with lower  
355 sensitivity (adjusted p-value  $< 0.001$ ). For both purification kits, Serum tubes showed the  
356 highest sensitivity. Sensitivity was also significantly lower for EDTA and Citrate tubes at time  
357 intervals T0 (adjusted p-value  $< 0.003$ ) and T16, respectively (adjusted p-value  $< 0.001$ ). EDTA  
358 at time interval T16 showed significantly higher **RNA concentration** and **extraction efficiency**  
359 (adjusted p-value  $< 0.001$ ). Moreover, EDTA also showed higher extraction efficiency  
360 compared to other tubes when MAX0.5 purification was used. Significant interactions of tube

361 type with purification kit and time interval were also observed for the **biotype** metric. The  
362 miRNA fraction in Serum was significantly lower when the purification was done using MAX0.5  
363 (adjusted p-value < 0.001). On the other hand, RNA extraction of Citrate plasma with the  
364 MIRA0.6 kit resulted in the lowest miRNA fraction (adjusted p-value < 0.001). Finally, the  
365 **reproducibility** for Citrate was significantly higher only when extracted with the MIRA0.6 kit  
366 (adjusted p-value < 0.001).

367

## 368 **Discussion**

369 In the extracellular RNA Quality Control (exRNAQC) study, we examined eight RNA  
370 purification methods, ten blood collection tubes, and three time intervals as pre-analytical  
371 variables affecting exRNA quantification, using full transcriptome mRNA and small RNA  
372 sequencing. Eight kits marketed for RNA purification from serum or plasma and ten blood  
373 collection tubes commonly used in the clinic and available at study initiation were selected for  
374 investigation. More than 1.6 liter of blood was collected from 20 different healthy donors to  
375 conduct experiments in triplicate (exRNAQC phase 1) or quintuplicate (exRNAQC phase 2),  
376 resulting in 456 extracellular transcriptomes. To control the RNA purification and library  
377 preparation workflows, 189 synthetic spike-in RNA molecules (Sequin and ERCC spike-ins for  
378 mRNA capture sequencing, and RC and LP spike-ins for small RNA sequencing) were used.  
379 We previously demonstrated the importance of using these spike-in RNAs for sequencing-  
380 based quantification of exRNA<sup>20,21</sup>, and further confirmed their critical importance in the current  
381 exRNAQC study. Here, spike-in RNAs were used to assess the RNA concentration and yield,  
382 and to determine the extraction efficiency of the different RNA purification methods.  
383 Importantly, we provide full access to the data and analysis pipelines through the European  
384 Genome-phenome Archive (EGA), ArrayExpress, R2 Genomics Analysis and Visualization  
385 Platform (<http://r2platform.com/exRNAQC/>) and <https://github.com/OncoRNALab/exRNAQC>  
386 (Data availability and Code availability), supplying the research community with different output  
387 formats (from raw sequencing data for bioinformaticians to browsable data access for any

388 researcher) to mine and analyze the exRNAQC data. Along with the data, we also provide  
389 consistent and standardized pre-analytics information to better interpret, compare, and  
390 reproduce our results. To this purpose, the transcriptomes are well annotated according to the  
391 Biospecimen Reporting for Improved Study Quality (BRISQ) guidelines<sup>22,23</sup> (Supplementary  
392 Table 5). Overall, these aspects make the exRNAQC study not only the largest, but also the  
393 most comprehensive sequencing-based evaluation of pre-analytical factors affecting  
394 extracellular transcriptomes so far.

395 Although all eight tested RNA purification kits are marketed for purification of exRNA from  
396 serum or plasma, unexpectedly large performance differences were observed for both small  
397 RNA and, to a greater extent, mRNA. With most exRNA kits specifically developed for  
398 microRNA quantification, it is not very surprising that the kit performance at miRNA level is  
399 more homogenous than at mRNA level. We clearly noted that the mRNA purification  
400 performance was linked to the biofluid input and eluate volume. More specifically, a higher  
401 biofluid input volume resulted in higher mRNA concentrations. This association did not hold  
402 true for miRNA, as exemplified by CCF1 and CCF4. Also, RNA purification kits with a large  
403 eluate volume typically showed a high RNA yield but low RNA concentration. For these kits,  
404 condensing the eluate volume prior to library preparation could potentially increase their overall  
405 performance. Kits with a high extraction efficiency did not always result in better RNA  
406 quantification results because of limited biofluid input volumes. If these kits would  
407 accommodate a larger biofluid input volume (while maintaining their extraction efficiency), their  
408 overall performance could improve dramatically. Note, however, that the extraction efficiency  
409 of some kits decreased when using the maximum input volume compared to the minimum  
410 (e.g., CCF). Finally, we want to emphasize the importance of removing co-purified genomic  
411 DNA (gDNA) from the extracted RNA samples prior to exRNA quantification<sup>24</sup>. We observed  
412 high-level gDNA contamination in RNA-eluates produced with the MAP kit despite applying a  
413 commonly used gDNA removal strategy that worked well for all other RNA purification kits.  
414 This gDNA contamination is most likely due to an incompatibility between the RNA elution

415 buffer and gDNA removal reagents. Alternative gDNA removal strategies should be evaluated  
416 and implemented before applying the MAP RNA extraction kit for exRNA analysis.

417 To evaluate the impact of the blood collection tube on downstream exRNA sequencing,  
418 biofluids (serum and plasma) were prepared at three different time intervals upon blood  
419 collection to assess potential changes in exRNA content due to blood storage at room  
420 temperature. To set a reference, each tube type was processed immediately after blood  
421 collection. For non-preservation tubes, we set the processing time intervals at 4 and 16 hours  
422 to mimic same-day processing and next-day processing, real-life situations often happening in  
423 the clinic. For preservation tubes that are specifically marketed to stabilize extracellular nucleic  
424 acids for 7 up to 14 days, more extreme time intervals for plasma preparation were selected,  
425 i.e., 24 and 72 hours upon blood collection. Surprisingly, in terms of stability over time,  
426 preservation tubes performed far worse than non-preservation tubes (including Serum), as  
427 reflected in increasing RNA concentrations and number of detected genes over time, and by  
428 compromised reproducibility. While preservation tubes were stored at room temperature for  
429 longer duration compared to non-preservation tubes, storage time was still substantially  
430 shorter than advertised for these tubes. In addition, RNA concentrations were much lower and  
431 hemolysis levels markedly higher in some of these tubes compared to non-preservation tubes,  
432 even at baseline (i.e., immediate processing upon blood draw). Although hemolysis may  
433 induce changes in exRNA content, the observed instability of the performance metrics over  
434 time for these tubes cannot solely be explained by differences in hemolysis over time. In this  
435 context, it is worth mentioning that, between individuals and across time intervals, we observed  
436 substantial differences in the amount of plasma that could be prepared from the preservation  
437 tubes, an issue that was reported previously<sup>25</sup>. This also points towards performance instability  
438 (over time). Moreover, for DNA Streck and RNA Streck, library preparation resulted in  
439 insufficient yield for equimolar pooling and the fraction of reads mapping to the correct strand  
440 was lower compared to other tubes (see strandedness in  
441 <https://github.com/OncoRNALab/exRNAQC>). Apart from the performance metrics used to  
442 evaluate the different blood collection tubes, tube stability over time was further evaluated by



443 analyzing circular versus linear RNA fractions, as well as by differential RNA abundance and  
444 originating cell type composition (via deconvolution) analyses. We hypothesized that the  
445 difference in stability between linear and circular RNA would translate to a distinct change in  
446 abundance over time, but this could not be confirmed. However, both the differential  
447 abundance analyses (across tubes and across time intervals) and the deconvolution analyses  
448 underscore the previous observation that preservation tubes perform far worse than non-  
449 preservation tubes. Based on these findings, we conclude that the tested preservation tubes  
450 are not suitable for exRNA analysis at the examined time intervals. It should be noted that  
451 during the exRNAQC study course, additional blood preservation tubes were developed and  
452 marketed, including the cfDNA/cfRNA Preservation Blood Tube (Zymo Research, R1075), the  
453 RNA Complete BCT (Streck, 230579), and cf-DNA/cf-RNA Preservative Tube (Norgen Biotek  
454 Corp., 63980). Posthoc evaluation using small RNA (for RNA Complete BCT) or mRNA capture  
455 sequencing (for cf-DNA/cf-RNA Preservative Tube) demonstrated poor performance  
456 (considering all evaluated performance metrics). The Zymo Research tube was not evaluated,  
457 as it could not be delivered by the company due to long delays in tube manufacturing (email  
458 communication). Importantly, although non-preservation tubes show better performance, it  
459 should be highlighted that the differential abundance analyses over time demonstrate that also  
460 for these tubes, the abundance of a considerable number of mRNAs changes over time. Based  
461 on the GSEA and deconvolution results, we recommend Citrate tubes for extracellular analysis  
462 and to process tubes within four hours upon blood draw for the analysis of exRNA. We invite  
463 blood collection tube manufacturers to increase their efforts to develop a plasma or serum tube  
464 that preserves the extracellular transcriptome for at least three days.

465 In the second phase of the exRNAQC study, we assessed whether interactions occur between  
466 pre-analytical variables such as RNA purification method, blood collection tube, and time  
467 interval. For both mRNA capture and small RNA sequencing, several two-way interactions  
468 between the blood collection tube and the RNA purification method, and between the blood  
469 collection tube and the time interval, were observed. In line with our expectations, no significant  
470 RNA purification method-time interval interactions were identified. Remarkably, for small RNA

471 sequencing, more significant interactions affecting the performance metrics were detected  
472 compared to mRNA capture sequencing. We observed significant tube-kit interactions for the  
473 duplication rate and sensitivity performance metrics for the mRNA profiles, and for the  
474 extraction efficiency, sensitivity, reproducibility, and biotype metrics for the small RNA profiles.  
475 These interactions are not unexpected, given that blood collection tube  
476 coatings/preservatives/anticoagulants may induce changes in RNA purification conditions that  
477 impact performance, such as specific monovalent or divalent ions, general salt concentrations  
478 or pH values<sup>26</sup>. Importantly, the presence of these interactions demonstrates that one should  
479 not simply combine the best-performing blood collection tubes and RNA purification kits (from  
480 single factor studies), but that compatibility between these pre-analytical variables should be  
481 tested when optimizing a specific sample processing workflow. For both small RNA and mRNA  
482 sequencing, significant tube-time interval interactions were observed, confirming that even for  
483 the best-performing tubes, standardization of blood processing time intervals remain crucially  
484 important. Note that for mRNA profiles, results of Sequin-based performance metrics (i.e., RNA  
485 concentration and extraction efficiency) should be interpreted with caution (in exRNAQC phase  
486 2), as we cannot exclude differential extraction efficiencies of Sequin spike-in RNA between  
487 MIR0.2 and CCF2. Importantly, this finding does not impact our conclusions of exRNAQC  
488 phase 1, given that Sequins were only used for performance evaluation of the different blood  
489 collection tubes for which exRNA was extracted using the same RNA purification method (i.e.,  
490 MIR0.2). Also, the performance metrics for evaluation of the different RNA purification methods  
491 in exRNAQC phase 1 do not rely on Sequin spike-ins.

492 Although the exRNAQC study represents the most comprehensive performance assessment  
493 of RNA purification methods and blood collection tubes in the context of exRNA profiling to  
494 date, the study also comes with a few limitations. All experiments were performed in a single  
495 laboratory. Ideally, a multicenter study should confirm the present findings. Although liquid  
496 biopsy collection and processing procedures in the exRNAQC study were tightly controlled,  
497 we cannot exclude a potential impact of other pre-analytics, e.g. fasting status of the donor or  
498 biofluid storage conditions. In addition, different donors were sampled for evaluation of non-

499 preservation and preservation blood collection tubes. As such, absolute values of the  
500 performance metrics (Supplementary Fig. 7 and Supplementary Fig. 8) cannot be directly  
501 compared across these two groups of tubes. However, note that this does not impact our  
502 conclusions for preservation tubes, as these are based on the stability of the performance  
503 metrics over time, i.e. comparing performance of the same tube type at different time intervals.  
504 Also, in the cellular deconvolution analysis, we did not include red blood cells and platelets,  
505 since the EPIC deconvolution tool has no signatures for these blood fractions. Therefore, blood  
506 collection tube performance in terms of platelet activation mediated exRNA release was not  
507 studied in the exRNAQC study. Nevertheless, the GSEA results of some tubes, including  
508 Serum and EDTA (Supplementary Table 4), point towards the presence of platelet activation.  
509 Note that the performance metrics solely assess technical performance, and that the impact  
510 of the pre-analytics on biomarker detection was not addressed in this study. Finally, we only  
511 focused on the analysis of microRNAs for small RNA sequencing. Although important, the  
512 study of other types of small RNAs was beyond the scope of this study.

513 In the exRNAQC study, we demonstrate that the choice of RNA purification method and blood  
514 collection tube substantially impacts mRNA and miRNA quantification by evaluation of 11  
515 performance metrics. Here, eight commercially available RNA purification methods and ten  
516 blood collection tubes were studied, but the proposed framework and metrics can also be used  
517 to evaluate the performance of more recently developed RNA purification methods and blood  
518 collection tubes. Based on the findings presented here, we highly recommend a) standardizing  
519 sample collection and processing, b) carefully annotating and reporting pre-analytics, and c)  
520 making use of synthetic spike-in RNA molecules for sequencing-based quality control and  
521 optional normalization of exRNA. This is crucially important for interpretation and comparison  
522 of all exRNA study results and will enhance the reproducibility of exRNA research as a starting  
523 point for biofluid based biomarker studies.

524

## 525 **Data availability**

526 Full access to the data of the exRNAQC study is available through the European Genome-  
527 phenome Archive (EGA; study ID EGAS00001005263 (exRNAQC phase1) and  
528 EGAS00001006499 (exRNAQC phase 2) and ArrayExpress (accession ID E-MTAB-10504 -  
529 E-MTAB-10507). mRNA capture and small RNA sequencing of the RNA purification kit  
530 experiment (exRNAQC phase 1) were identified with study codes exRNAQC004 and  
531 exRNAQC011, respectively. mRNA capture and small RNA sequencing of the blood collection  
532 tube experiment (exRNAQC phase 1) were identified with study codes exRNAQC005 and  
533 exRNAQC013, respectively. mRNA capture and small RNA sequencing of exRNAQC phase 2  
534 were identified with the study code exRNAQC017. Browsable access is provided through the  
535 R2 Genomics Analysis and Visualization Platform (<http://r2platform.com/exRNAQC/>), as  
536 exemplified for the analysis of differential gene abundance across time intervals in  
537 Supplementary Fig. 16. Note that in R2, data on MAP RNA eluates were excluded (because  
538 of residual DNA contamination), and that data can be analyzed using two different  
539 normalization strategies, i.e., counts normalized by variance stabilizing transformation  
540 (DESeq2) or spike-normalized counts. Detailed sample annotation (pre-analytics information)  
541 can be found in Supplementary Table 5.

542

## 543 **Code availability**

544 Analysis pipelines are available through GitHub (<https://github.com/OncoRNALab/exRNAQC>).

545

## 546 **References**

547

- 548 1. Taylor-Phillips, S. et al. Open accuracy of non-invasive prenatal testing using cell-free  
549 DNA for detection of Down, Edwards and Patau syndromes: A systematic review and  
550 meta-analysis. *BMJ Open* **6**, e010002 (2016).

- 551 2. Heitzer, E., Haque, I. S., Roberts, C. E. S. & Speicher, M. R. Current and future  
552 perspectives of liquid biopsies in genomics-driven oncology. *Nat. Rev. Genet.* **20**, 71-88  
553 (2019).
- 554 3. Stępień, E., et al. The circulating non-coding RNA landscape for biomarker research:  
555 lessons and prospects from cardiovascular diseases. *Acta Pharmacol. Sin.* **39**, 1085-  
556 1099 (2018).
- 557 4. Guay, C. & Regazzi, R. Circulating microRNAs as novel biomarkers for diabetes mellitus.  
558 *Nat. Rev. Endocrinol.* **9**, 513-521 (2013).
- 559 5. Zeng, L., Cui, J., Wu, H. & Lu, Q. The emerging role of circulating microRNAs as  
560 biomarkers in autoimmune diseases. *Autoimmunity* **47**, 419-429 (2014).
- 561 6. Sole, C., Arnaiz, E., Manterola, L., Otaegui, D. & Lawrie, C. H. The circulating  
562 transcriptome as a source of cancer liquid biopsy biomarkers. *Semin. Cancer Biol.* **58**,  
563 100-108 (2019).
- 564 7. Zaporozhchenko, I. A., Ponomaryova, A. A., Rykova, E. Y. & Laktionov, P. P. The  
565 potential of circulating cell-free RNA as a cancer biomarker: challenges and  
566 opportunities. *Expert Rev. Mol. Diagn.* **18**, 133-145 (2018).
- 567 8. Houseley, J. & Tollervey, D. The many pathways of RNA degradation. *Cell* **136**, 763-776  
568 (2009).
- 569 9. de Jong, O. G. et al. Cellular stress conditions are reflected in the protein and RNA  
570 content of endothelial cell-derived exosomes. *J. Extracell. Vesicles* **1**, (2012).
- 571 10. Gahlawat, A. W. et al. Evaluation of storage tubes for combined analysis of circulating  
572 nucleic acids in liquid biopsies. *Int. J. Mol. Sci.* **20**, 704 (2019).
- 573 11. Sorber, L. et al. Circulating cell-free DNA and RNA analysis as liquid biopsy: Optimal  
574 centrifugation protocol. *Cancers (Basel)* **11**, 458 (2019).
- 575 12. Söderström, A. C., Nybo, M., Nielsen, C. & Vinholt, P. J. The effect of centrifugation  
576 speed and time on pre-analytical platelet activation. *Clin. Chem. Lab. Med.* **54**, 1913-  
577 1920 (2016).

- 578 13. Das, S. et al. The Extracellular RNA Communication Consortium: Establishing  
579 foundational knowledge and technologies for extracellular RNA research. *Cell* **177**, 231-  
580 242 (2019).
- 581 14. Ainsztein, A. M. et al. The NIH Extracellular RNA Communication Consortium. *J.*  
582 *Extracell. Vesicles* **4**, 27493 (2015).
- 583 15. Grossman, R. L. et al. BloodPAC Data Commons for liquid biopsy data. *JCO Clin.*  
584 *Cancer Informatics* **5**, 479-486 (2021).
- 585 16. Febbo, P. G. et al. Minimum Technical Data Elements for liquid biopsy data submitted to  
586 public databases. *Clin. Pharmacol. Ther.* **107**, 730-734 (2020).
- 587 17. Mestdagh, P. et al. Evaluation of quantitative miRNA expression platforms in the  
588 microRNA quality control (miRQC) study. *Nat. Methods* **11**, 809-815 (2014).
- 589 18. Shah, J. S., Soon, P. S. & Marsh, D. J. Comparison of methodologies to detect low levels  
590 of hemolysis in serum for accurate assessment of serum microRNAs. *PLoS One* **11**, 1-  
591 12 (2016).
- 592 19. Kirschner, M. B. et al. The impact of hemolysis on cell-free microRNA biomarkers. *Front.*  
593 *Genet.* **4**, 94 (2013).
- 594 20. Hulstaert, E. et al. Charting extracellular transcriptomes in the Human Biofluid RNA Atlas.  
595 *Cell Rep.* **33**, 108552 (2020).
- 596 21. Hulstaert, E. et al. Messenger RNA capture sequencing of extracellular RNA from human  
597 biofluids using a comprehensive set of spike-in controls. *STAR Protoc.* **2**, 100475 (2021).
- 598 22. Moore, H. M. et al. Biospecimen reporting for improved study quality (BRISQ). *J.*  
599 *Proteome Res.* **10**, 3429-3438 (2011).
- 600 23. Moore, H. M. et al. Biospecimen reporting for improved study quality (BRISQ). *Cancer*  
601 *Cytopathol.* **119**, 92-102 (2011).
- 602 24. Verwilt, J. et al. When DNA gets in the way: A cautionary note for DNA contamination in  
603 extracellular RNA-seq studies. *Proc. Natl. Acad. Sci. U. S. A.* **117**, 18934-18936 (2020).

- 604 25. Sorber, L. et al. A multicenter study to assess EGFR mutational status in plasma: Focus  
605 on an optimized workflow for liquid biopsy in a clinical setting. *Cancers (Basel)* **10**, 1-14  
606 (2018).
- 607 26. Hu, W. P., Chen, Y. C. & Chen, W. Y. Improve sample preparation process for miRNA  
608 isolation from the culture cells by using silica fiber membrane. *Sci. Rep.* **10**, 1-9 (2020).
- 609 27. Deveson, I. W. et al. Representing genetic variation with synthetic DNA standards. *Nat.*  
610 *Methods* **13**, 784-791 (2016).
- 611 28. Locati, M. D. et al. Improving small RNA-seq by using a synthetic spike-in set for size-  
612 range quality control together with a set for data normalization. *Nucleic Acids Res.* **43**,  
613 e89 (2015).
- 614 29. Hafner, M. et al. RNA-ligase-dependent biases in miRNA representation in deep-  
615 sequenced small RNA cDNA libraries. *RNA* **17**, 1697-1712 (2011).
- 616 30. Van Goethem, A. et al. Depletion of tRNA-halves enables effective small RNA  
617 sequencing of low-input murine serum samples. *Sci. Rep.* **6**, 1-11 (2016).
- 618 31. Martin, M. Cutadapt removes adapter sequences from high-throughput sequencing reads.  
619 EMBnet.journal, [S.l.], v. 17, n. 1, p. pp. 10-12, may 2011. ISSN 2226-6089. Available at:  
620 <<https://journal.embnet.org/index.php/embnetjournal/article/view/200>>. Date accessed:  
621 21 dec. 2022. doi:<https://doi.org/10.14806/ej.17.1.200>..
- 622 32. Bray, N. L., Pimentel, H., Melsted, P. & Pachter, L. Near-optimal probabilistic RNA-seq  
623 quantification. *Nat. Biotechnol.* **34**, 525-527 (2016).
- 624 33. Dobin, A. et al. STAR: Ultrafast universal RNA-seq aligner. *Bioinformatics* **29**, 15-21  
625 (2013).
- 626 34. Quinlan, A. R. & Hall, I. M. BEDTools: A flexible suite of utilities for comparing genomic  
627 features. *Bioinformatics* **26**, 841-842 (2010).
- 628 35. Wang, L., Wang, S. & Li, W. RSeQC: Quality control of RNA-seq experiments.  
629 *Bioinformatics* **28**, 2184-2185 (2012).
- 630 36. Yates, A. D. et al. Ensembl 2020. *Nucleic Acids Res.* **48**, D682-D688 (2020).

- 631 37. Langmead, B., Trapnell, C., Pop, M. & Salzberg, S. L. Ultrafast and memory-efficient  
632 alignment of short DNA sequences to the human genome. *Genome Biol.* **10**, R25 (2009).
- 633 38. Griffiths-Jones, S. The microRNA registry. *Nucleic Acids Res.* **32**, D109-D111 (2004).
- 634 39. Griffiths-Jones, S., Grocock, R. J., van Dongen, S., Bateman, A. & Enright, A. J.  
635 miRBase: microRNA sequences, targets and gene nomenclature. *Nucleic Acids Res.* **34**,  
636 D140-D144 (2006).
- 637 40. Griffiths-Jones, S., Saini, H. K., Van Dongen, S. & Enright, A. J. miRBase: Tools for  
638 microRNA genomics. *Nucleic Acids Res.* **36**, D154-D158 (2008).
- 639 41. Kozomara, A. & Griffiths-Jones, S. MiRBase: Integrating microRNA annotation and  
640 deep-sequencing data. *Nucleic Acids Res.* **39**, D152-D157 (2011).
- 641 42. Kozomara, A. & Griffiths-Jones, S. MiRBase: Annotating high confidence microRNAs  
642 using deep sequencing data. *Nucleic Acids Res.* **42**, D68-D73 (2014).
- 643 43. Kozomara, A., Birgaoanu, M. & Griffiths-Jones, S. MiRBase: From microRNA sequences  
644 to function. *Nucleic Acids Res.* **47**, D155-D162 (2019).
- 645 44. Trapnell, C., Pachter, L. & Salzberg, S. L. TopHat: Discovering splice junctions with RNA-  
646 Seq. *Bioinformatics* **25**, 1105-1111 (2009).
- 647 45. Zhang, X. O. et al. Diverse alternative back-splicing and alternative splicing landscape  
648 of circular RNAs. *Genome Res.* **26**, 1277-1287 (2016).
- 649 46. Morlion, A. et al. CiLiQuant: Quantification of RNA junction reads based on their circular  
650 or linear transcript origin. *Front. Bioinforma.* **2**, 834034 (2022).
- 651 47. Avila Cobos, F., Vandesompele, J., Mestdagh, P. & De Preter, K. Computational  
652 deconvolution of transcriptomics data from mixed cell populations. *Bioinformatics* **34**,  
653 1969-1979 (2018).
- 654 48. Schelker, M. et al. Estimation of immune cell content in tumour tissue using single-cell  
655 RNA-seq data. *Nat. Commun.* **8**, 2032 (2017).
- 656 49. Racle, J., de Jonge, K., Baumgaertner, P., Speiser, D. E. & Gfeller, D. Simultaneous  
657 enumeration of cancer and immune cell types from bulk tumor gene expression data.  
658 *Elife* **6**, e26476 (2017).



- 659 50. Avila Cobos, F., Alquicira-Hernandez, J., Powell, J. E., Mestdagh, P. & De Preter, K.  
660 Benchmarking of cell type deconvolution pipelines for transcriptomics data. *Nat.*  
661 *Commun.* **11**, 5650 (2020).
- 662 51. Brooks, M. E. et al. glmmTMB balances speed and flexibility among packages for zero-  
663 inflated generalized linear mixed modeling. *R J.* **9**, 378-400 (2017).
- 664 52. Brand, A., Allen, L., Altman, M., Hlava, M. & Scott, J. Beyond authorship: attribution,  
665 contribution, collaboration, and credit. *Learn Publ.* **28**, 151-155 (2015).
- 666 53. Van Paemel, R. et al. Genome-wide study of the effect of blood collection tubes on the  
667 cell-free DNA methylome. *Epigenetics* **16**, 797-807 (2021).

668

## 669 **Figure legends**

670

671 **Fig. 1: In the extracellular RNA Quality Control (exRNAQC) study, the impact of eight exRNA purification**  
672 **methods, ten blood collection tubes and three processing time intervals on mRNA capture and small RNA**  
673 **sequencing is assessed by evaluating each of the pre-analytics separately (exRNAQC phase 1), as well as**  
674 **by analyzing interactions between pre-analytics (exRNAQC phase 2).** To evaluate the impact of the eight  
675 exRNA purification methods (upper left panel), two blood draws from a single individual were performed to  
676 separately apply mRNA capture and small RNA sequencing. To compare RNA purification performance, nine  
677 performance metrics were calculated (see Methods). To evaluate the impact of the ten blood collection tubes (upper  
678 right panel), nine individuals were sampled, enabling to test three time intervals between blood draw and  
679 downstream processing for each of the tubes. Preservation tubes were processed immediately upon blood  
680 collection (T0), after 24 hours (T24) or after 72 hours (T72). Non-preservation plasma and serum tubes were  
681 processed immediately upon blood collection (T0), after 4 hours (T04) or after 16 hours (T16). Both mRNA capture  
682 and small RNA sequencing were performed, and the data was analyzed using five performance metrics (see  
683 Methods). Based on the sensitivity and reproducibility metrics, a dedicated selection of precise and sensitive exRNA  
684 purification methods and blood collection tubes was put forward for further evaluation in exRNAQC phase 2. For  
685 both mRNA capture and small RNA sequencing, five individuals were sampled to test three blood collection tubes  
686 and four exRNA purification methods. Interactions between exRNA purification methods, blood collection tubes and  
687 processing time intervals were assessed by the evaluation of six performance metrics (see Methods). ACD-A: BD  
688 Vacutainer Glass ACD Solution A tube; Biomatrix: LBgard Blood Tube; CCF: QIAamp ccfDNA/RNA Kit; CIRC:  
689 Plasma/Serum Circulating and Exosomal RNA Purification Kit/Slurry Format; Citrate: Vacuette Tube 9 ml 9NC

690 Coagulation sodium citrate 3.2%; DNA Streck: Cell-Free DNA BCT; EDTA: BD Vacutainer Plastic K2EDTA tube;  
691 EDTA separator: Vacuette Tube 8 ml K2E K2EDTA Separator; MAP: MagNA Pure 24 Total NA Isolation Kit in  
692 combination with the MagNA Pure instrument; MAX: the Maxwell RSC miRNA Plasma and Exosome Kit in  
693 combination with the Maxwell RSC Instrument; MIR: the miRNeasy Serum/Plasma Kit; MIRA: the miRNeasy  
694 Serum/Plasma Advanced Kit; MIRV: the mirVana PARIS Kit with purification protocol for total RNA; MIRVE:  
695 mirVana PARIS Kit with purification protocol for RNA enriched for small RNAs; NUC: the NucleoSpin miRNA Plasma  
696 Kit; PAXgene: PAXgene Blood ccfDNA Tube; RNA Streck: Cell-Free RNA BCT; Roche: Cell-Free DNA Collection  
697 Tube; Serum: BD Vacutainer SST II Advance Tube.

698

699 **Fig. 2: RNA purification methods strongly influence mRNA and small RNA sequencing.** For both mRNA  
700 capture (left panels) and small RNA (right panels) sequencing, performance metrics are shown. For each of the  
701 unique RNA purification-plasma input volume combinations, 3 technical replicates are analyzed ( $n = 39$  for mRNA  
702 capture sequencing,  $n = 45$  for small RNA sequencing). **(a&b)** Absolute number of mRNAs and miRNAs,  
703 respectively, that reach the count threshold (i.e., sensitivity). **(c&d)** Endogenous RNA concentration. Values are log  
704 rescaled to the lowest mean of all kits and transformed back to linear scale. The mean and 95% confidence interval  
705 are shown. **(e&f)** Reproducibility between technical replicates based on ALC (smaller ALC indicates better  
706 reproducibility) at mRNA and miRNA level, respectively. **(g&h)** Overview of all performance metrics at mRNA  
707 capture and small RNA sequencing level, respectively, after transforming the values to robust z-scores. A higher z-  
708 score indicates a better performance. Rows and columns of the heatmaps are clustered according to complete  
709 hierarchical clustering based on Euclidean distance. Average z refers to the mean of robust z-scores for a specific  
710 RNA purification method. The number that follows the abbreviation of the purification kit is the plasma input volume  
711 (in ml).

712

713 **Fig. 3. The tested blood preservation tubes are not suitable for exRNA analysis.** Per blood collection tube and  
714 per performance metric, a summary of mean fold changes (FC) between time interval 1 (i.e., T04 (blood processing  
715 starts 4 hours after blood collection) for non-preservation tubes and T24 for preservation tubes) and time interval 0  
716 (T0) versus time interval 2 (i.e., T16 for non-preservation tubes and T72 for preservation tubes) and time interval 0  
717 (T0) is given, for both mRNA capture sequencing **(a&c)** and small RNA sequencing **(b&d)**. Ideally, the mean FC of  
718 the stability metrics approaches 1, indicating that there is little change from baseline and the blood collection tube  
719 performs well over time. Non-preservation blood tubes are the BD Vacutainer Plastic K2EDTA tube (EDTA),  
720 Vacuette Tube 8 ml K2E K2EDTA Separator (EDTA separator), BD Vacutainer Glass ACD Solution A tube (ACD-  
721 A), Vacuette Tube 9 ml 9NC Coagulation sodium citrate 3.2% (Citrate), and BD Vacutainer SST II Advance Tube  
722 (Serum). The preservation tubes are the Cell-Free RNA BCT (RNA Streck), Cell-Free DNA BCT (DNA Streck),

723 PAXgene Blood ccfDNA Tube (PAXgene), Cell-Free DNA Collection Tube (Roche) and LBgard Blood Tube  
724 (Biomatrix). Note that different donors were sampled and that tubes were processed at different time intervals for  
725 preservation and non-preservation blood tubes.

726

727 **Fig. 4: Changes in immune cell composition over time.** Colored cells represent adjusted p-values < 0.05  
728 (Tukey's method) from beta regression models with random effects for all cell types. Time interval 0 corresponds to  
729 plasma prepared immediately after blood draw. For the non-preservation tubes, time interval 1 corresponds to T04  
730 and time interval 2 to T16. For the preservation tubes, time interval 1 corresponds to T24 and time interval 2 to T72.  
731 T04, T16, T24, T72: plasma prepared 4, 16, 24 and 72 hours after blood draw, respectively. Note that different  
732 donors were sampled and that tubes were processed at different time intervals for preservation and non-  
733 preservation tubes. ACD-A: BD Vacutainer Glass ACD Solution A tube; Biomatrix: LBgard Blood Tube; Citrate:  
734 Vacuette Tube 9 ml 9NC Coagulation sodium citrate 3.2%; DNA Streck: Cell-Free DNA BCT; EDTA: BD Vacutainer  
735 Plastic K2EDTA tube; EDTA separator: Vacuette Tube 8 ml K2E K2EDTA Separator; PAXgene: PAXgene Blood  
736 ccfDNA Tube; RNA Streck: Cell-Free RNA BCT; Roche: Cell-Free DNA Collection Tube; Serum: BD Vacutainer  
737 SST II Advance Tube.

738

739 **Fig. 5: Interactions between pre-analytics should be considered when comparing RNA purification kit or**  
740 **blood collection tube performance.** For both mRNA capture and small RNA sequencing, 5 biological replicates  
741 were used for each of the 18 unique tube (n = 3), purification method (n = 2) and time interval (n = 3) combinations  
742 (total n = 90). Shown are the interactions between pre-analytics for mRNA capture (a) and small RNA (b)  
743 sequencing. P-values correspond to the Wald test for the terms in the linear mixed-effects model. Example of a  
744 significant blood collection tube – kit interaction on mRNA (c) and small RNA (d) level. Adjusted p-values were  
745 calculated using Tukey's method for comparing a family of 3 estimates. In the boxplots, the lower and upper hinge  
746 of the boxes represents the 25th and 75th percentile, respectively. The whiskers extend to the lowest and highest  
747 value that is within 1.5 times the interquartile range. Data beyond the end of the whiskers are outliers. CCF: QIAamp  
748 ccfDNA/RNA Kit; MAX: Maxwell RSC miRNA Plasma and Exosome Kit in combination with the Maxwell RSC  
749 Instrument; MIR: miRNeasy Serum/Plasma Kit; MIRA: miRNeasy Serum/Plasma Advanced Kit.

750

## 751 **Methods**

### 752 **Donor material and liquid biopsy preparation**

753 Sample collection was approved by the ethics committee of Ghent University Hospital (Belgian  
754 Registration number B670201733701) and written informed consent was obtained from 20

755 healthy donors, including 5 males and 15 females (age ranges from 27 to 54 years old).  
756 Incapacitated or pregnant individuals, as well as individuals younger than 20 years old were  
757 excluded from the study. Venous blood was collected from an elbow vein after disinfection with  
758 2% chlorhexidine in 70% alcohol. In total, ten different blood collection tubes were used: the  
759 BD Vacutainer SST II Advance Tube (referred to as Serum in this study; Becton Dickinson and  
760 Company, 366444), BD Vacutainer Plastic K2EDTA tube (EDTA; Becton Dickinson and  
761 Company, 367525), Vacuette Tube 8 ml K2E K2EDTA Separator (EDTA separator; Greiner  
762 Bio-One, 455040), BD Vacutainer Glass ACD Solution A tube (ACD-A; Becton Dickinson and  
763 Company, 366645), Vacuette Tube 9 ml 9NC Coagulation sodium citrate 3.2% (citrate; Greiner  
764 Bio-One, 455322), Cell-Free RNA BCT (RNA Streck; Streck, 230248), Cell-Free DNA BCT  
765 (DNA Streck; Streck, 218996), PAXgene Blood ccfDNA Tube (PAXgene; Qiagen, 768115),  
766 Cell-Free DNA Collection Tube (Roche; Roche, 07785666001), and LBgard Blood Tube  
767 (Biomatrica; Biomatrica, M68021-001). Immediately after blood draw, blood collection tubes  
768 were inverted five times and all tubes were transported to the laboratory for plasma or serum  
769 preparation. Tubes were immediately processed or at 4h, 16h, 24h or 72h upon blood  
770 collection. Details on the different blood draws and plasma/serum preparations are available  
771 in the Supplementary Information.

772

### 773 **RNA isolation and gDNA removal**

774 In total, eight different exRNA purification methods, including six spin column-based kits and  
775 two automated extraction procedures, were used according to the manufacturer's manual: the  
776 miRNeasy Serum/Plasma Kit (abbreviated to MIR in this study; Qiagen, 217184), miRNeasy  
777 Serum/Plasma Advanced Kit (MIRA; Qiagen, 217204), mirVana PARIS Kit (MIRV; Life  
778 Technologies, AM1556), NucleoSpin miRNA Plasma Kit (NUC; Macherey-Nagel, 740981.50),  
779 QIAamp ccfDNA/RNA Kit (CCF; Qiagen, 55184), Plasma/Serum Circulating and Exosomal  
780 RNA Purification Kit/Slurry Format (CIRC; Norgen Biotek Corp., 42800), Maxwell RSC miRNA  
781 Plasma and Serum Kit (Promega, AX5740 and AS1680) in combination with the Maxwell RSC  
782 Instrument (MAX; Promega, AS4500), and MagNA Pure 24 Total NA Isolation Kit (Roche,

783 07658036001) in combination with the MagNA Pure 24 instrument (MAP; Roche,  
784 07290519001). Per 100 µl liquid biopsy input volume, 1 µl Sequin spike-in controls (Garvan  
785 Institute of Medical Research<sup>27</sup>) and/or 1 µl RNA extraction Control (RC) spike-ins<sup>28</sup> (IDT) were  
786 added to the lysate for TruSeq RNA Exome Library Prep sequencing and/or TruSeq Small  
787 RNA Library Prep sequencing, respectively (see Supplementary Information for  
788 concentrations). To maximally concentrate the RNA eluate, minimum eluate volumes were  
789 used, unless otherwise recommended by the manufacturer. For evaluation of the different  
790 purification methods in exRNAQC phase 1, both the minimum and maximum recommended  
791 plasma input volumes were tested in triplicate. Details on the exRNA purification methods, and  
792 Sequin and RC spike-in controls are available in the Supplementary Information.

793 gDNA removal of RNA samples for TruSeq RNA Exome Library Prep sequencing was  
794 performed using HL-dsDNase (ArcticZymes, 70800-202) and Heat & Run 10X Reaction Buffer  
795 (ArcticZymes, 66001). Briefly, 2 µl External RNA Control Consortium (ERCC) spike-in controls  
796 (ThermoFisher Scientific, 4456740), 1 µl HL-dsDNase and 1.4 µl reaction buffer were added  
797 to 12 µl RNA eluate, and incubated for 10 min at 37 °C, followed by 5 min at 55 °C. To RNA  
798 samples used for both TruSeq RNA Exome Library Prep sequencing and TruSeq Small RNA  
799 Library Prep sequencing, also 2 µl Library Prep Control (LP) spike-ins<sup>29</sup> (IDT) were added to  
800 the RNA eluate before starting gDNA removal and 1.6 µl reaction buffer was used. RNA  
801 samples solely used for TruSeq Small RNA Library Prep sequencing were not DNase treated.  
802 Here, 2 µl LP spike-ins were added to 12 µl RNA eluate before starting library preparation.  
803 Details on ERCC and LP spike-in control concentrations are available in the Supplementary  
804 Information.

805

### 806 **mRNA capture sequencing**

807 mRNA libraries were prepared starting from 8.5 µl RNA eluate using the TruSeq RNA Exome  
808 Kit (Illumina, 20020189, 20020490, 20020492, 20020493, 20020183), according to the  
809 manufacturer's protocol with following adaptations: fragmentation of RNA for 2 min at 94 °C,  
810 second strand cDNA synthesis for 30 minutes at 16 °C (with the thermal cycler lid pre-heated

811 at 40 °C), and second PCR amplification using 14 PCR cycles. Upon the first and second PCR  
812 amplification, libraries were validated on a Fragment Analyzer (Advanced Analytical  
813 Technologies), using 1 µl of library. Library concentrations were determined using Fragment  
814 Analyzer software for smear analysis in the 160 to 700 base pair (bp) range. Library  
815 quantification was qPCR-based, using the KAPA Library Quantification Kit (Kapa Biosystems),  
816 and/or based on NanoDrop 1000 measurements. Further details on the library preparation and  
817 quantification protocol are described in Hulstaert *et al.*<sup>21</sup> For evaluation of the different RNA  
818 purification methods, 45 libraries were pooled on replicate level at 4 nM, yielding three pools  
819 of 15 samples, quality controlled using the KAPA Library Quantification Kit, and sequenced on  
820 a NextSeq 500 instrument (NextSeq 500/550 High Output Kit v2.5 (Illumina, 20024907, PE 2  
821 x 75 cycles)). Loading concentrations of the three pools ranged from 2.1 pM to 2.3 pM.  
822 Percentage PhiX was 3%. For evaluation of the different blood collection tubes, all 90 libraries  
823 were pooled at 1.5 nM or the highest possible concentration, quality controlled using the KAPA  
824 Library Quantification Kit, and sequenced on a NovaSeq 6000 instrument (NovaSeq 6000 S2  
825 Reagent Kit (Illumina, 20012861, PE 2 x 75 cycles)). Loading concentration of the pool was  
826 324 pM. Percentage PhiX was 1 %. For exRNAQC phase 2, 90 libraries were pooled at 5.50  
827 nM, quality controlled using the KAPA Library Quantification Kit, and sequenced on a SP100  
828 flow cell (Illumina, NovaSeq 6000). Loading concentration of the pool is 340 pM. Differences  
829 in read distribution across samples were subsequently used to re-pool individual libraries in  
830 order to obtain an equimolar pool. Subsequently, samples were sequenced on a S2 flow cell,  
831 at a loading concentration of 360 pM.

832

### 833 **Small RNA sequencing**

834 Small RNA libraries were prepared starting from 5 µL RNA eluate using the TruSeq Small RNA  
835 Library Prep Kit (Illumina, RS-200-0012, RS-200-0024, RS-200-0036, RS-200-0048),  
836 according to the manufacturer's protocol with following adaptations: the RNA 3' adapter (RA3)  
837 and the RNA 5' adapter (RA5) were 4-fold diluted with RNase-free water, and the number of  
838 PCR cycles was increased to 16<sup>20,30</sup>. For phase 1, samples were divided across library prep

839 batches according to index availability. For each batch, 3  $\mu$ l of small RNA library from each  
840 sample was pooled prior to automated size selection using the Pippin prep (Sage Sciences,  
841 CDH3050). Size selected libraries were quantified using qPCR, and sequenced on a MO flow  
842 cell (Illumina, NextSeq 500) using loading concentrations ranging from 1.2 to 2.4 pM.  
843 Differences in read distribution across samples were subsequently used to re-pool individual  
844 libraries in order to obtain an equimolar pool. After size selection on a Pippin prep and qPCR  
845 quantification, these pools were sequenced on a HO flow cell (Illumina, NextSeq 500, NextSeq  
846 500/550 High Output Kit v2.5, 20024907) using loading concentrations ranging from 1.2 to 3  
847 pM. For phase 2, individual libraries were quantified using qPCR and pooled equimolarly  
848 across 2 pools. After size selection on a Pippin prep and qPCR quantification, library pools  
849 were sequenced on a NovaSeq 6000 XP flow cell (Illumina) using a loading concentration of  
850 270 nM.

851

## 852 **Data analysis**

853 In total, 456 transcriptomes were profiled and analyzed. The raw, processed and metadata  
854 were submitted to the European Genome-phenome Archive (EGA), ArrayExpress and R2  
855 Genomics Analysis and Visualization Platform (see Data availability). A high-level summary of  
856 the sequencing statistics can be found in Supplementary Table 3 and Supplementary Table 6-  
857 10. Detailed pre-analytics information (for the BRISQ elements<sup>22,23</sup>) can be found in  
858 Supplementary Table 5.

859

## 860 ***Quality control and quantification of mRNA capture sequencing data***

861 In case of adapter contamination indicated by FASTQC (v0.11.8;  
862 [www.bioinformatics.babraham.ac.uk/projects/fastqc](http://www.bioinformatics.babraham.ac.uk/projects/fastqc)), adapters were trimmed with Cutadapt<sup>31</sup>  
863 (v1.18; 3' adapter R1: 'AGATCGGAAGAGCACACGTCTGAACTCCAGTCA'; 3' adapter R2  
864 'AGATCGGAAGAGCGTCGTGTAGGGAAAGAGTGT'). Only reads with  $\geq 99\%$  accuracy in at  
865 least 80% of bases of both mates were kept. Subsequently, FASTQ files were subsampled  
866 with Seqtk (v1.3; <https://github.com/lh3/seqtk>) to the lowest number of reads pairs obtained in

867 the experiment. Since the low amount of input RNA resulted in a high number of duplicates  
868 (Supplementary Table 3 and Supplementary Table 7), we removed these duplicates using  
869 Clumpify dedupe (v38.26; [www.sourceforge.net/projects/bbmap](http://www.sourceforge.net/projects/bbmap)) with the following  
870 specifications: paired-end mode, 2 substitutions allowed, kmersize of 31, and 20 passes. For  
871 duplicate removal, only the first 60 bases of both reads were considered to account for the  
872 sequencing quality drop at the end of the reads. Strand-specific transcript-level quantification  
873 of the deduplicated FASTQ files was performed with Kallisto<sup>32</sup> (v0.44.0). For coverage and  
874 strandedness analysis, mapped reads were obtained by STAR<sup>33</sup> (v2.6.0c) using the default  
875 parameters (except for `--twopassMode Basic`, `--outFilterMatchNmin 20` and `--  
876 outSAMprimaryFlag AllBestScore`). For all exons coverage information was retrieved by the  
877 `genomeCoverageBed` and `intersectBed` functions of BEDTools<sup>34</sup> (v2.27.1). Strandedness  
878 information was obtained with RSeQC<sup>35</sup> (v2.6.4). The reference files for all analyses were  
879 based on genome build hg38 ([www.ncbi.nlm.nih.gov/assembly/GCF\\_000001405.26](http://www.ncbi.nlm.nih.gov/assembly/GCF_000001405.26)) and  
880 transcriptome build Ensembl v91<sup>36</sup>. Spike annotations were added to both genome and  
881 transcriptome files.

882

### 883 ***Quality control and quantification of small RNA sequencing data***

884 First, adaptor trimming (3' adaptor: TGG AATTCTCGGGTGCCAAGG) was performed using  
885 Cutadapt (v1.16) with a maximum error rate of 0.15 and discarding reads shorter than 15 bp  
886 and those in which no adaptor was found. Subsequently, low quality reads were filtered out  
887 (reads with  $\geq$  Q20 in at least 80% of bases were kept) by FASTX-Toolkit (v0.0.14;  
888 [http://hannonlab.cshl.edu/fastx\\_toolkit/index.html](http://hannonlab.cshl.edu/fastx_toolkit/index.html)). Filtered FASTQ files were subsampled to  
889 the minimum number of reads in the experiment (Supplementary Table 6 and Supplementary  
890 Table 8) using Seqtk (v1.3). Reads were collapsed with FASTX-Toolkit and LP and RC spike  
891 reads (including possible fragments) were annotated. The non-spike reads were mapped with  
892 Bowtie<sup>37</sup> (v1.2.2, with additional parameters `-k 10 -n 1 -l 25`) considering only perfect matches.  
893 Mapped reads were annotated by matching the genomic coordinates of each read with  
894 genomic locations of miRNAs (obtained from miRBase<sup>38-43</sup>, v22) and other small RNAs (tRNAs



895 obtained from UCSC GRCh38/hg38; snoRNA, snRNA, MT\_tRNA, MT\_rRNA, rRNA, and  
896 miscRNA from Ensembl, v91).

897

### 898 ***Defining performance metrics***

899 The statistical programming language R (v4.0.3; [www.r-project.org](http://www.r-project.org)) was used throughout this  
900 section and all scripts can be found at GitHub (<https://github.com/OncoRNALab/exRNAQC>).

901 In total, 11 performance metrics were developed, of which nine were used for evaluation of the  
902 different RNA purification methods (exRNAQC phase 1), five for blood collection tube  
903 evaluation and six for phase 2 interaction analyses (Table 1). Each performance metric is  
904 briefly explained below. For each part of the study, more in-depth descriptions of the metrics  
905 and results are available through GitHub.

906

| performance metric    | exRNAQC phase 1 - RNA purification                                                           | exRNAQC phase 1 - blood collection tube                                                         |
|-----------------------|----------------------------------------------------------------------------------------------|-------------------------------------------------------------------------------------------------|
| RNA concentration     | RNA concentration in eluate, i.e., total sum of endogenous counts / sum of ERCC or LP spikes | RNA concentration in plasma, i.e., total sum of endogenous counts / sum of Sequin or RC spikes* |
| sensitivity           | number of protein coding genes or miRNAs*                                                    |                                                                                                 |
| reproducibility       | based on RNA count fold changes between replicates*                                          |                                                                                                 |
| biotype               |                                                                                              | % of counts that belongs to mRNAs or miRNAs*                                                    |
| hemolysis             |                                                                                              | Nanodrop (absorbance of light at 414 nm)                                                        |
| RNA yield             | RNA concentration x eluate volume                                                            |                                                                                                 |
| count threshold       | detection threshold that removes 95% of single observations between technical replicates     |                                                                                                 |
| data retention        | % of total counts remaining after applying count threshold                                   |                                                                                                 |
| coverage              | % of transcriptome covered at least once                                                     |                                                                                                 |
| extraction efficiency | RNA yield / plasma input volume*                                                             |                                                                                                 |
| duplication rate      | % duplicated reads*                                                                          |                                                                                                 |

907 **Table 1. In total, 11 performance metrics are determined to evaluate the impact of RNA purification methods and blood collection tubes on mRNA capture and small**  
908 **RNA sequencing results.** An overview of the different performance metrics is given. Gray indicates that the performance metric is not calculated. Metrics marked with an \* were  
909 also calculated in exRNAQC phase 2. ERCC: Extracellular RNA Communication Consortium; LP: Library Prep Control; RC: RNA extraction Control.

910 *Count threshold*

911 To distinguish signal from noise, we made use of pairwise count comparisons across three  
912 technical replicates for evaluation of the different RNA purification methods. We defined a  
913 count threshold for each RNA purification method and biotype in a similar manner as defined  
914 in the miRQC study<sup>17</sup>. Specifically, a threshold that reduces the fraction of single positives in  
915 technical replicates by at least 95 % (single positives are cases where a given gene has zero  
916 counts in one replicate and a non-zero value in the other one). This threshold can be used as  
917 a reproducibility metric between technical replicates. For each kit-volume combination, the  
918 median threshold of the three pairwise replicate comparisons was used (Supplementary Table  
919 2). As the blood collection tube experiment in exRNAQC phase 1 did not have technical  
920 replicates and RNA purification for all tubes was performed using MIR0.2, the median  
921 thresholds of MIR0.2 (3 counts for small RNAs; 6 counts for mRNAs) were applied here as  
922 well.

923

924 *Data retention*

925 Data retention is defined as the percentage of gene counts remaining after applying the count  
926 threshold as filter, therefore giving information about the fraction of counts lost by applying the  
927 cut-off.

928

929 *Sensitivity*

930 We defined sensitivity as the number of different protein coding genes or miRNAs picked up  
931 above the count threshold.

932

933 *RNA concentration*

934 For the RNA purification method experiment in exRNAQC phase 1, the different methods were  
935 tested on the same plasma sample. By adding equal amounts of ERCC and LP spikes (for  
936 mRNA and small RNA, respectively) after RNA purification, we were able to calculate

937 endogenous RNA concentrations in the eluate. For instance, in cases of low endogenous RNA  
938 content after RNA purification, relatively more ERCC and LP spikes will be sequenced. By  
939 dividing the total sum of endogenous counts by the sum of ERCC or LP spikes, we could  
940 therefore compare the RNA concentrations in the eluate of the different purification methods.  
941 For the blood collection tube experiment of phase 1 and for the blood collection tube-kit  
942 combinations of phase 2, we were interested in the impact of the different blood collection  
943 tubes on the RNA concentration in plasma. By adding equal amounts of Sequin and RC spikes  
944 (for mRNA and small RNA, respectively) during RNA purification (upon sample lysis), we were  
945 able to calculate relative endogenous RNA concentrations in the plasma. For instance, in  
946 cases of low endogenous RNA content before extraction, relatively more Sequin and RC  
947 spikes will be sequenced. By dividing the total sum of endogenous counts by the sum of Sequin  
948 or RC spikes, we could therefore compare the RNA concentrations in plasma of the different  
949 tubes.

950

#### 951 *RNA yield*

952 Multiplying the RNA concentration by the eluate volume gives the RNA yield in the total eluate.

953

#### 954 *Extraction efficiency*

955 Correcting the relative RNA yield for the plasma input volume (dividing yield by input volume)  
956 gives an idea of the theoretical RNA extraction efficiency of the method.

957

#### 958 *Reproducibility*

959 As described in the miRQC study<sup>17</sup>, the area left of the cumulative distribution curve (ALC) was  
960 calculated by comparing the actual cumulative distribution curve of log<sub>2</sub> fold changes in gene  
961 or miRNA abundance between pairs of replicates to the theoretical cumulative distribution  
962 (optimal curve). Less reproducibility between samples results in more deviations from this  
963 optimal curve and therefore larger ALC-values.

964 *Duplication rate*

965 Duplication rate was obtained by dividing the number of reads removed by Clumpify (see  
966 Methods) by the number of subsampled reads.

967

968 *Coverage*

969 Coverage is the percentage of bases from the total transcriptome covered by at least one  
970 sequencing read.

971

972 *Hemolysis*

973 Hemolysis was measured with Nanodrop (absorbance of light at 414 nm) in plasma.

974

975 *Biotype*

976 Fraction of total counts that go to mRNA (mRNA capture sequencing) or miRNAs (small RNA  
977 sequencing).

978

979 ***Accounting for size selection bias***

980 For the small RNA library preparation of the RNA purified using the different methods in  
981 exRNAQC phase 1, the three technical replicates of each extraction method were divided over  
982 three different pools. Next, pippin prep size selection for miRNAs occurred on each pool  
983 individually. To account for size selection bias (which resulted in consistently lower sequencing  
984 counts in the second pool), we each time downsampled the miRNA counts of the other two  
985 replicates to the sum of miRNA counts of the replicate in the second pool. Down-sampling was  
986 based on reservoir sampling - random sampling without replacement (subsample\_miRs.py  
987 script on <https://github.com/OncoRNALab/exRNAQC>).

988

## 989 **Transforming performance metrics into robust z-scores**

990 For evaluation of the different RNA purification methods in exRNAQC phase 1, individual  
991 scores for performance metrics were transformed to z-scores. As the standard z-score is  
992 sensitive to outliers, we used a robust z-score transformation, based on the median ( $\mu_{1/2}$ ) and  
993 median absolute deviation ( $MAD = \text{median}_i(|X_i - \text{median } X_{1\dots n}|)$ ), instead. The general  
994 formula for robust z-score calculation is shown below:

$$995 \quad \text{robust zscore} = \frac{x - \mu_{1/2}}{s}$$

996 Where s is a scaling factor that depends on the MAD. In case MAD is not zero:  $s = MAD * 1.4826$ . If MAD equals zero, s approximately equals the standard deviation:  $s = \text{meanAD} * 1.2533$ , with  $\text{meanAD} = \text{mean}_i(|X_i - \text{mean } X_{1\dots n}|)$  (<https://asq.org/quality-press/display-item?item=E0801>, <https://www.ibm.com/docs/en/cognos-analytics/11.1.0?topic=terms-modified-z-score>).

1001

## 1002 **Fold change analyses for stability over time assessment**

1003 To evaluate tube stability across time intervals in exRNAQC phase 1 and 2, we determined  
1004 several performance metrics per blood collection tube at different time intervals. We then  
1005 calculated, for every tube and donor, the fold change across different time intervals (relative to  
1006 the base interval at T0, so excluding T24-72 and T04-16). A theoretical example is shown in  
1007 Supplementary Fig. 6.

1008

## 1009 **circRNA and linear RNA fraction determination**

1010 For the assessment of blood collection tube stability over time in exRNAQC phase 1, an in-  
1011 house pipeline was used to investigate the differences in fractions of circRNAs between tubes  
1012 and time intervals. Starting from the raw FASTQ files from the mRNA capture sequencing,  
1013 Cutadapt<sup>31</sup> (v1.18) was used to remove the adapter sequences and reads that end up shorter  
1014 than 20 bp. Next, the reads of which less than 80% of the bases had a Q-score higher than 19  
1015 were removed. Subsequently, clumpify.sh from BBMap (v38.26;

1016 (<https://sourceforge.net/projects/bbmap>) with default parameters was used to remove PCR  
1017 duplicate reads. The deduplicated reads were mapped using TopHat<sup>44</sup> (v2.1.0) with Bowtie  
1018 (v1.1.2) and fusion mapping turned on. Next, the CIRCexplorer2<sup>45</sup> (v2.3.3) functions parse,  
1019 annotate, assemble and denovo were used to identify and annotate known circRNAs and to  
1020 identify novel circRNAs or alternative back-splicing events. Last, the circRNA ratios on back-  
1021 splice junction and gene level were calculated using CiLiQuant<sup>46</sup> (v1.0).

1022

### 1023 ***Differential abundance analyses***

1024 Differential abundance analyses were performed on the data of the blood collection tube  
1025 experiment of exRNAQC phase 1. In a matrix selected for T0 samples, genes were filtered out  
1026 when not present with a minimum of 10 counts in all three replicates of one tube type. For the  
1027 comparison of the time intervals, only the samples for the respective tube were selected and  
1028 genes were filtered out when not present with a minimum of 10 counts in all three replicates of  
1029 one time interval. The filtered data was normalized with Limma voom (v3.52.4) and contrasts,  
1030 comparing subsequent time intervals to T0, were fit. Genes with a  $|\log_2 \text{FC}| > 1$  and an  
1031 Benjamini-Hochberg adjusted p-value  $< 0.05$  were retained as significant. On the log<sub>2</sub> fold  
1032 change ranked gene list, gene set enrichment analysis (GSEA) with fgsea (v1.22.0) on the  
1033 MSigDB C2 pathways was performed. Pathways with an Benjamini-Hochberg adjusted p-value  
1034 of less than 0.05 were retained as significantly up or down regulated.

1035

### 1036 ***Differences in immune cell composition over time***

1037 To further evaluate blood collection tube stability over time in exRNAQC phase 1, we first we  
1038 used computational deconvolution (on subsampled data) to infer the cell type composition  
1039 (proportions) of different immune cell types present in blood<sup>47</sup>. Since the origin (niche) of the  
1040 expression profiles has a tremendous impact on the deconvolution results<sup>48</sup> and it is possible  
1041 that RNA coming from other cell type(s) is also present in circulation, we used EPIC<sup>49</sup>, a  
1042 method that has a built-in reference matrix from circulating immune cells (known as 'BRef'  
1043 signature) and includes the presence of an unknown component ('otherCells'). Specifically, we

1044 used TPM normalized count matrices as input, as recommended by the authors<sup>49</sup> and shown  
1045 as the optimal choice for this method in a recent benchmarking study<sup>50</sup>.

1046 Next, to evaluate differences in cell type composition of several blood immune cell types, we  
1047 performed a repeated-measures analysis by means of beta regression models with random  
1048 effects. For each cell type a separate model was fitted with 'tube' and 'time interval' as factor  
1049 variables (main and interaction effects included), with donor as random effect and with tube-  
1050 specific variance components (allowing for variance heterogeneity that was observed in the  
1051 data exploration phase). All models were fit with the glmmTMB R package (v1.1.2.3)<sup>51</sup>. Based  
1052 on the model fits, all pairwise comparisons between the three time intervals were tested for  
1053 each type of tube: T0 vs T1, T0 vs T2 and T1 vs T2. For each combination of cell type and  
1054 tube, the p-values were adjusted for multiple testing with Tukey's method as implemented in  
1055 the emmeans.glmmTMB R function (R packages glmmTMB and emmeans (v1.7.0;  
1056 <https://CRAN.R-project.org/package=emmeans>)). All analyses were done with the statistical  
1057 software R (v4.1.0; [www.r-project.org](http://www.r-project.org)). See <https://github.com/OncoRNALab/exRNAQC>  
1058 (exRNAQC005, deconvolution) for a detailed report with the corresponding R code.

1059

### 1060 ***Repeated measures analyses***

1061 For data analysis of exRNAQC phase 2, linear mixed-effects models were built with the nlme  
1062 package (v3.1-157) in R. Blood collection tube, RNA purification method and time interval were  
1063 included as fixed effects and donor ID as random effect. The heteroscedasticity introduced by  
1064 different RNA purification methods was considered. Next, an ANOVA test was performed on  
1065 the model to estimate the significance of the interactions. The normality of the residuals was  
1066 checked with the qqnorm function (see <https://github.com/OncoRNALab/exRNAQC>).

1067

### 1068 **Acknowledgements**

1069 This study was in part funded by Ghent University (BOF-GOA), Stand up to Cancer (Kom op  
1070 tegen Kanker, the Flemish cancer society), the Foundation against Cancer, Research



1071 Foundation Flanders (FWO), the Liquidhope Transcan-2 project and the European Union's  
1072 Horizon 2020 research and innovation program (grant agreement 826121). H.H.H., C.E.,  
1073 J.D.W., E.H., P.D., and R.V.P. were funded by a predoctoral fellowship grant from the FWO  
1074 (12Q6217N, 1S07416N, 1S90621N, 1133120N, 11H7523N, and 11B3718N). F.A.C was  
1075 supported by a Special Research Fund postdoctoral scholarship from Ghent University  
1076 (BOF21/PDO/007). A.M. was supported by a Special Research Fund scholarship from Ghent  
1077 University, Stand up to Cancer and a predoctoral fellowship grant from the FWO (11C1621N).  
1078 A.D. was supported by a postdoctoral fellowship grant from the Special Research Fund of  
1079 Ghent University and the FWO (1224021N). K.S. was supported by a grant from Stand up to  
1080 Cancer. J.D. was supported by the Special Research Fund of Ghent University. We thank  
1081 Illumina for sponsoring library preparation and sequencing reagents, and Qiagen, Promega  
1082 and Roche for sponsoring blood collection tubes and/or RNA purification kits. The sponsors  
1083 had no role in the design, interpretation, or writing of the study.

1084

## 1085 **Author contributions**

1086 The exRNAQC Consortium

1087

1088 Author contributions are reported according to the CRediT taxonomy<sup>52</sup>. Within the CRediT  
1089 groups, authors are in alphabetical order and \* indicates lead contributions. All authors  
1090 approved the manuscript.

1091

## 1092 **Conceptualization**

1093 Anneleen Decock<sup>1,2</sup>, Olivier De Wever<sup>2,3</sup>, Celine Everaert<sup>1,2,4</sup>, Hetty Hilde Helmoortel<sup>1,2</sup>, An  
1094 Hendrix<sup>2,3</sup>, Pieter Mestdagh<sup>1,2,5</sup>, Annelien Morlion<sup>1,2</sup>, Jo Vandesompele<sup>1,2,5</sup> & Ruben Van  
1095 Paemel<sup>1,2,4,6</sup>

1096

## 1097 **Data curation**

1098 Francisco Avila Cobos<sup>1,2,4</sup>, Anneleen Decock<sup>1,2</sup>, Celine Everaert<sup>1,2,4</sup>, Hetty Hilde Helsmoortel<sup>1,2</sup>,  
1099 Jan Koster<sup>7</sup>, Annelien Morlion<sup>1,2</sup>, Franco Poma-Soto<sup>1,2</sup>, Ruben Van Paemel<sup>1,2,4,6</sup> & Jasper  
1100 Verwilt<sup>1,2</sup>

1101

## 1102 **Formal analysis**

1103 Jasper Anckaert<sup>1,2</sup>, Francisco Avila Cobos<sup>1,2,4</sup>, Jilke De Wilde<sup>1,2,4\*</sup>, Celine Everaert<sup>1,2,4</sup>, Carolina  
1104 Fierro<sup>5</sup>, Pieter Mestdagh<sup>1,2,5</sup>, Annelien Morlion<sup>1,2,\*</sup>, Franco Poma-Soto<sup>1,2</sup>, Jo Vandesompele<sup>1,2,5</sup>,  
1105 Ruben Van Paemel<sup>1,2,4,6,\*</sup> & Jasper Verwilt<sup>1,2</sup>

1106

## 1107 **Funding acquisition**

1108 Anneleen Decock<sup>1,2</sup>, Pieter Mestdagh<sup>1,2,5</sup> & Jo Vandesompele<sup>1,2,5</sup>

1109

## 1110 **Investigation**

1111 Anneleen Decock<sup>1,2</sup>, Philippe Decruyenaere<sup>1,2,8</sup>, Jill Deleu<sup>1,2</sup>, Jilke De Wilde<sup>1,2,4</sup>, Bert  
1112 Dhondt<sup>2,3,9</sup>, Hetty Hilde Helsmoortel<sup>1,2</sup>, Eva Hulstaert<sup>1,2,10</sup>, Nele Nijs<sup>5</sup>, Justine Nuytens<sup>1,2</sup>,  
1113 Annouck Philippron<sup>2,11,12</sup>, Kathleen Schoofs<sup>1,2,4</sup>, Eveline Vanden Eynde<sup>1,2</sup>, Ruben Van  
1114 Paemel<sup>1,2,4,6</sup>, Kimberly Verniers<sup>1,2</sup>, Jasper Verwilt<sup>1,2</sup> & Nurten Yigit<sup>1,2</sup>

1115

## 1116 **Methodology**

1117 Francisco Avila Cobos<sup>1,2,4</sup>, Anneleen Decock<sup>1,2</sup>, Bert Dhondt<sup>2,3,9</sup>, Thibaut D'huyvetter<sup>1,2</sup>, Celine  
1118 Everaert<sup>1,2,4</sup>, Carolina Fierro<sup>5</sup>, Hetty Hilde Helsmoortel<sup>1,2</sup>, Pieter Mestdagh<sup>1,2,5</sup>, Annelien  
1119 Morlion<sup>1,2</sup>, Nele Nijs<sup>5</sup>, Annouck Philippron<sup>2,11,12</sup>, Thomas Piofczyk<sup>5</sup>, Olivier Thas<sup>13,14,15</sup>, Jo  
1120 Vandesompele<sup>1,2,5</sup> & Ruben Van Paemel<sup>1,2,4,6</sup>

1121

## 1122 **Project administration**

1123 Anneleen Decock<sup>1,2</sup>

1124

## 1125 **Resources**

1126 Philippe Decruyenaere<sup>1,2,8</sup>, Jilke De Wilde<sup>1,2,4</sup>, Bert Dhondt<sup>2,3,9</sup>, Eva Hulstaert<sup>1,2,10</sup>, Jan Koster<sup>7</sup>,  
1127 Scott Kuersten<sup>16</sup>, Tim R. Mercer<sup>17,18</sup>, Annouck Philippron<sup>2,11,12</sup>, Gary P. Schroth<sup>16</sup> & Ruben Van  
1128 Paemel<sup>1,2,4,6</sup>

1129

### 1130 **Software**

1131 Jasper Anckaert<sup>1,2</sup>, Francisco Avila Cobos<sup>1,2,4</sup>, Celine Everaert<sup>1,2,4</sup>, Annelien Morlion<sup>1,2</sup>, Olivier  
1132 Thas<sup>13,14,15</sup>, Ruben Van Paemel<sup>1,2,4,6</sup> & Jasper Verwilt<sup>1,2</sup>

1133

### 1134 **Supervision**

1135 Katleen De Preter<sup>2,4</sup>, Pieter Mestdagh<sup>1,2,5</sup>, Jo Vandesompele<sup>1,2,5</sup> & Tom Van Maerken<sup>1,2,19</sup>

1136

### 1137 **Visualization**

1138 Francisco Avila Cobos<sup>1,2,4</sup>, Anneleen Decock<sup>1,2</sup>, Jilke De Wilde<sup>1,2,4</sup>, Celine Everaert<sup>1,2,4</sup>, Jan  
1139 Koster<sup>7</sup>, Annelien Morlion<sup>1,2</sup>, Franco Poma-Soto<sup>1,2</sup>, Kathleen Schoofs<sup>1,2,4</sup>, Ruben Van  
1140 Paemel<sup>1,2,4,6</sup> & Jasper Verwilt<sup>1,2</sup>

1141

### 1142 **Writing - original draft**

1143 Francisco Avila Cobos<sup>1,2,4</sup>, Anneleen Decock<sup>1,2</sup>, Philippe Decruyenaere<sup>1,2,8</sup>, Jill Deleu<sup>1,2</sup>, Jilke  
1144 De Wilde<sup>1,2,4</sup>, Celine Everaert<sup>1,2,4</sup>, Annelien Morlion<sup>1,2</sup>, Kathleen Schoofs<sup>1,2,4</sup>, Ruben Van  
1145 Paemel<sup>1,2,4,6</sup> & Jasper Verwilt<sup>1,2</sup>

1146

### 1147 **Writing - review & editing**

1148 Anneleen Decock<sup>1,2</sup>, Celine Everaert<sup>1,2,4</sup>, Pieter Mestdagh<sup>1,2,5</sup>, Annelien Morlion<sup>1,2</sup> & Jo  
1149 Vandesompele<sup>1,2,5</sup>

1150

### 1151 **Affiliations**

1152 1 OncoRNALab, Center for Medical Genetics, Department of Biomolecular Medicine, Ghent

- 1153 University, Ghent, Belgium.
- 1154 2 Cancer Research Institute Ghent (CRIG), Ghent, Belgium.
- 1155 3 Laboratory of Experimental Cancer Research, Ghent University, Ghent, Belgium.
- 1156 4 TOBI lab, Center for Medical Genetics, Department of Biomolecular Medicine, Ghent  
1157 University, Ghent, Belgium.
- 1158 5 Biogazelle, Zwijnaarde, Belgium.
- 1159 6 Department of Pediatrics, Ghent University Hospital, Ghent, Belgium.
- 1160 7 Center for Experimental and Molecular Medicine (CEMM), Amsterdam University Medical  
1161 Centers, University of Amsterdam, Amsterdam, The Netherlands.
- 1162 8 Department of Hematology, Ghent University Hospital, Ghent, Belgium.
- 1163 9 Department of Urology, Ghent University Hospital, Ghent, Belgium.
- 1164 10 Department of Dermatology, Ghent University Hospital, Ghent, Belgium.
- 1165 11 Lab for Experimental Surgery, Ghent University, Ghent, Belgium.
- 1166 12 Department of Gastrointestinal Surgery, Ghent University Hospital, Ghent, Belgium.
- 1167 13 Data Science Institute (DSI), Interuniversity Institute for Biostatistics and Statistical  
1168 Bioinformatics (I-BioStat), Hasselt University, Hasselt, Belgium.
- 1169 14 Department of Applied Mathematics, Computer Science and Statistics, Ghent University,  
1170 Gent, Belgium.
- 1171 15 National Institute of Applied Statistics Research Australia (NIASRA), University of  
1172 Wollongong, Wollongong, Australia.
- 1173 16 Illumina, San Diego, California, USA.
- 1174 17 Australian Institute of Bioengineering and Nanotechnology, University of Queensland,  
1175 Brisbane, QLD, Australia.
- 1176 18 Kinghorn Centre for Clinical Genomics, Garvan Institute of Medical Research, Sydney,  
1177 NSW, Australia.
- 1178 19 Department of Laboratory Medicine, AZ Groeninge, Kortrijk, Belgium.
- 1179

## 1180 **Conflict of interest**

1181 Carolina Fierro and Nele Nijs are employees, Thomas Piofczyk is a former employee, Pieter  
1182 Mestdagh is a consultant, and Jo Vandesompele a co-founder of Biogazelle, a clinical CRO  
1183 providing human biofluid extracellular RNA sequencing, now a CellCarta company. Gary P.  
1184 Schroth and Scott Kuersten are employees of Illumina, providing library preparation and  
1185 sequencing reagents. Promega, Qiagen and Roche sponsored blood collection tubes and/or  
1186 RNA purification kits. Funders did not influence data analysis, interpretation, and manuscript  
1187 writing.

1188

## 1189 **Additional information**

1190

### 1191 **Supplementary Table legends**

1192

1193 **Supplementary Table 1. Available literature on the influence of pre-analytics on RNA sequencing data,**  
1194 **including studies on plasma and/or serum.** The pre-analytics analyzed in the selected studies are listed: number  
1195 of blood collection tube types; hemolysis measured (yes/no); the fluid (serum/plasma or both); number of  
1196 centrifugation protocols; number of RNA isolation kits; the RNA type; the gene expression analysis method; other  
1197 pre-analytics.

1198

1199 **Supplementary Table 2. Filter threshold of the different RNA purification methods.** Kit: RNA purification kit  
1200 abbreviation; mRNA threshold: median threshold that removes 95% of single positive genes between technical  
1201 replicates; miRNA threshold: median threshold that removes 95% of single positive miRNAs between technical  
1202 replicates. More explanation on these thresholds in Methods. NA: Not applicable.

1203

1204 **Supplementary Table 3. mRNA capture sequencing data statistics of RNA purification kit experiment**  
1205 **(exRNAQC004).** UniqueID: RNA identifier; SampleID: combination of kit abbreviation and technical replicate  
1206 number; raw\_reads: number of sequenced reads pairs; qcfiltered\_reads: number of read pairs after quality filtering;  
1207 post\_subsampling: number of read pairs after subsampling; post\_deduplication: number of read pairs after Clumpify  
1208 duplicate removal; duplicate\_prct: % of duplicates in subsampled reads; kallisto\_prct\_alignment: % of duplicate  
1209 removed reads that were pseudoaligned; strandedness\_prct: % of reads on correct strand (stranded protocol).

1210

1211 **Supplementary Table 4. Gene set enrichment analysis results on differential abundant mRNAs across time**

1212 **intervals for each blood collection tube type of exRNAQC phase 1 and 2.** Results of the different comparisons

1213 are summarized in different tabs. For each comparison, gene sets significantly enriched for differential abundant

1214 genes are indicated, as well as their p-value (pval), BH-adjusted p-value (padj), expected error for the standard

1215 deviation of the p-value logarithm (log2err), normalized enrichment score (NES) and leading-edge genes that drive

1216 the enrichment.

1217

1218 **Supplementary Table 5. Pre-analytical variable annotation for all samples included in the exRNAQC study.**

1219 In the first tab, the different pre-analytical variables are listed, and for each of them a description is provided. Note

1220 that the pre-analytics are categorized into three groups, i.e., variables linked to the blood draw (with prefix B\_),

1221 biofluid preparation (with prefix L\_) or RNA purification (with prefix R\_). This tab also includes a description of the

1222 BRISQ elements<sup>22,23</sup>. In the following tabs, annotated samples are listed per experiment (the mRNA capture

1223 sequencing of the RNA purification kit study (exRNAQC004), the mRNA capture sequencing of the blood collection

1224 tube study (exRNAQC005), the small RNA sequencing of the RNA purification kit study (exRNAQC011), the small

1225 RNA sequencing of the blood collection tube study (exRNAQC013) or the mRNA capture/small RNA sequencing

1226 of phase 2 (exRNAQC017\_mRNA and exRNAQC017\_small RNA)).

1227

1228 **Supplementary Table 6. Small RNA sequencing data statistics of RNA purification kit experiment**

1229 **(exRNAQC011).** UniqueID: RNA identifier; SampleID: combination of kit abbreviation and technical replicate

1230 number; raw\_reads: number of sequenced (single-end) reads; qcfiltered\_reads: number of reads after quality

1231 filtering; post\_subsampling: number of reads after subsampling; aligned\_reads: number of subsampled reads

1232 aligned to reference genome; spike\_reads: number of reads aligned to spikes; prct\_aligned: % of subsampled reads

1233 aligned to reference genome; prct\_aligned\_plus\_spikes: % of subsampled reads aligned to reference genome or

1234 to spikes.

1235

1236 **Supplementary Table 7. mRNA capture sequencing data statistics of blood collection tube experiment**

1237 **(exRNAQC005).** UniqueID: RNA identifier; SampleID: combination of tube abbreviation, donor number (biological

1238 replicate), and time interval; raw\_reads: number of sequenced reads pairs; qcfiltered\_reads: number of read pairs

1239 after quality filtering; post\_subsampling: number of read pairs after subsampling; post\_deduplication: number of

1240 read pairs after Clumpify duplicate removal; duplicate\_prct: % of duplicates in subsampled reads;

1241 kallisto\_prct\_alignment: % of duplicate removed reads that were pseudoaligned; strandedness\_prct: % of reads on

1242 correct strand (stranded protocol).

1243

1244 **Supplementary Table 8. Small RNA sequencing data statistics of blood collection tube experiment**

1245 **(exRNAQC013)**. UniqueID: RNA identifier; SampleID: combination of tube abbreviation, donor number (biological  
1246 replicate), and time interval; raw\_reads: number of sequenced (single-end) reads; qcfiltered\_reads: number of  
1247 reads after quality filtering; post\_subsampling: number of reads after subsampling; aligned\_reads: number of  
1248 subsampled reads aligned to reference genome; spike\_reads: number of reads aligned to spikes; prct\_aligned: %  
1249 of subsampled reads aligned to reference genome; prct\_aligned\_plus\_spikes: % of subsampled reads aligned to  
1250 reference genome or to spikes.

1251

1252 **Supplementary Table 9. mRNA capture sequencing data statistics of phase 2 (exRNAQC017)**. UniqueID:

1253 RNA identifier; SampleID: combination of RNA isolation kit abbreviation, tube abbreviation, time interval and donor  
1254 number (biological replicate); raw\_reads: number of sequenced reads pairs; qcfiltered\_reads: number of read pairs  
1255 after quality filtering; post\_subsampling: number of read pairs after subsampling; post\_deduplication: number of  
1256 read pairs after Clumpify duplicate removal; duplicate\_prct: % of duplicates in subsampled reads;  
1257 kallisto\_prct\_alignment: % of duplicate removed reads that were pseudoaligned; strandedness\_prct: % of reads on  
1258 correct strand (stranded protocol).

1259

1260 **Supplementary Table 10. Small RNA sequencing data statistics of phase 2 (exRNAQC017)**. UniqueID: RNA

1261 identifier; SampleID: combination of RNA isolation kit abbreviation, tube abbreviation, time interval and donor  
1262 number (biological replicate); raw\_reads: number of sequenced (single-end) reads; qcfiltered\_reads: number of  
1263 reads after quality filtering; post\_subsampling: number of reads after subsampling; aligned\_reads: number of  
1264 subsampled reads aligned to reference genome; spike\_reads: number of reads aligned to spikes; prct\_aligned: %  
1265 of subsampled reads aligned to reference genome; prct\_aligned\_plus\_spikes: % of subsampled reads aligned to  
1266 reference genome or to spikes.

1267

1268 **Supplementary Table 11. Capture probes for Sequin and External RNA Control Consortium (ERCC) spike-**

1269 **in controls**. Oligos to capture the Sequin and ERCC spike-in controls are listed. For each oligo, the probe\_ID,  
1270 sequence, GC content (%), melting temperature ( $T_m$  in °C),  $\Delta G$  and binding position in the Sequin or ERCC spike-  
1271 in sequence are given.

1272

1273 **Supplementary Figure legends**

1274



1275 **Supplementary Fig. 1: The exRNAQC study represents the most comprehensive analysis of pre-analytics**  
1276 **in the context of exRNA profiling.** The exRNAQC study outperforms previous studies analyzing pre-analytics  
1277 impacting exRNA analyses in terms of the number of evaluated blood collection tubes and RNA purification methods  
1278 (Supplementary Table 1). Studies are annotated with NA if the number of blood collection tubes or RNA purification  
1279 methods cannot be clearly determined from the corresponding publication or if no RNA purification was performed.  
1280

1281 **Supplementary Fig. 2: Performance of RNA purification kits on duplication rate, coverage and strandedness**  
1282 **at mRNA level.** For each of the unique RNA purification-plasma input volume combinations, 3 technical replicates  
1283 are analyzed. (a) Percentage of read duplicates found by Clumpify after subsampling (n = 39). (b) Percentage of  
1284 bases in the total transcriptome that are covered at least once (n = 39). (c) Percentage of reads on correct strand  
1285 according to strand-specific protocol (n = 45). The number that follows the abbreviation of the purification kit is the  
1286 plasma input volume (in ml).  
1287

1288 **Supplementary Fig. 3: Correlation between Femto Pulse-based (in ng/μl) and sequencing-based eluate RNA**  
1289 **concentrations.** (a) Endogenous mRNA vs ERCC ratio of RNA purification kits. (b) Endogenous small RNA vs LP  
1290 ratio of RNA purification kits. Only samples with a Femto Pulse concentration above the limit of quantification (15  
1291 pg/μl) were kept (n = 23 for mRNA capture sequencing, n = 45 for small RNA sequencing). Axes showed in  
1292 logarithmic scale. Spearman correlation coefficients and p-values are indicated (calculated using the spearmanr  
1293 function (Scipy library) in Python). CCF: QIAamp ccfDNA/RNA Kit; CIRC: Plasma/Serum Circulating and Exosomal  
1294 RNA Purification Kit/Slurry Format; ERCC: Extracellular RNA Communication Consortium; LP: Library Prep Control;  
1295 MAX: Maxwell RSC miRNA Plasma and Exosome Kit in combination with the Maxwell RSC Instrument; MIR:  
1296 miRNeasy Serum/Plasma Kit; MIRA: miRNeasy Serum/Plasma Advanced Kit; MIRV: mirVana PARIS Kit with  
1297 purification protocol for total RNA; MIRVE: mirVana PARIS Kit with purification protocol for RNA enriched for small  
1298 RNAs; NUC: NucleoSpin miRNA Plasma Kit.  
1299

1300 **Supplementary Fig. 4: Extracellular RNA is highly fragmented.** For each RNA purification method, FemtoPulse  
1301 results are shown for one of the triplicate RNA purifications using the maximum plasma input volume.  
1302 Measurements are on DNase-treated samples (using 2 μl sample), except for MIRVE0.625 (RNA004084; 2 μl RNA  
1303 eluate). Number that follows the abbreviation of the purification kit is the plasma input volume (in ml). CCF: QIAamp  
1304 ccfDNA/RNA Kit; CIRC: Plasma/Serum Circulating and Exosomal RNA Purification Kit/Slurry Format; MAX: the  
1305 Maxwell RSC miRNA Plasma and Exosome Kit in combination with the Maxwell RSC Instrument; MIR: the  
1306 miRNeasy Serum/Plasma Kit; MIRA: the miRNeasy Serum/Plasma Advanced Kit; MIRV: the mirVana PARIS Kit

1307 with purification protocol for total RNA; MIRVE: mirVana PARIS Kit with purification protocol for RNA enriched for  
1308 small RNAs; NUC: the NucleoSpin miRNA Plasma Kit.

1309

1310 **Supplementary Fig. 5: Performance of RNA purification methods on count threshold, data retention, RNA**  
1311 **yield, and extraction efficiency at mRNA and small RNA level.** For each of the unique RNA purification-plasma  
1312 input volume combinations, 3 technical replicates are analyzed (n = 39 for mRNA capture sequencing, n = 45 for  
1313 small RNA sequencing). **(a&b)** Count threshold required to eliminate at least 95% of single positive genes or  
1314 miRNAs, respectively, between technical replicates. **(c&d)** Data retention: % of total counts that are kept after  
1315 applying count threshold. **(e&f)** RNA yield, obtained by correcting the RNA concentration for eluate volume, values  
1316 are log rescaled to the lowest mean of all kits and transformed back to linear space, mean and 95% confidence  
1317 interval are shown. **(g&h)** Extraction efficiency, obtained by correcting the RNA yield for input volume, values are  
1318 log rescaled to the lowest mean of all kits and transformed back to linear space, mean and 95% confidence interval  
1319 are shown. Number that follows the abbreviation of the purification kit is the plasma input volume (in ml).

1320

1321 **Supplementary Fig. 6: Illustrative example of performance metric evolution over time** for one donor, two  
1322 blood collection tubes and three time intervals **(a)** and corresponding boxplot of the fold changes per blood collection  
1323 tube **(b)**. T0: plasma prepared immediately after blood draw, T24, T72: plasma prepared 24 hours and 72 hours  
1324 after blood draw, respectively. The white triangle on the boxplot corresponds to the mean. Reproduced from Van  
1325 Paemel *et al.*<sup>53</sup>

1326

1327 **Supplementary Fig. 7: Performance metrics of blood collection tubes over time at mRNA level.** **(a)** Evolution  
1328 of hemolysis in plasma, measured by absorbance at 414 nm with Nanodrop. **(b)** Evolution of RNA concentration  
1329 calculated based on the number of endogenous counts vs Sequin spike-in RNA. **(c)** Evolution of sensitivity, i.e., the  
1330 number of protein coding genes. **(d)** Evolution of the fraction of counts mapping to mRNAs versus all counts (biotype  
1331 performance metric). **(e)** Evolution of the pairwise area left of the curve (reproducibility performance metric). T0:  
1332 plasma prepared immediately after blood draw. T04, T16, T24, T72: plasma prepared 4, 16, 24 and 72 hours after  
1333 blood draw, respectively. Note that different donors were sampled and that tubes were processed at different time  
1334 intervals for preservation and non-preservation tubes. ACD-A: BD Vacutainer Glass ACD Solution A tube;  
1335 Biomatrix: LBgard Blood Tube; Citrate: Vacuette Tube 9 ml 9NC Coagulation sodium citrate 3.2%; DNA Streck:  
1336 Cell-Free DNA BCT; EDTA: BD Vacutainer Plastic K2EDTA tube; EDTA separator: Vacuette Tube 8 ml K2E  
1337 K2EDTA Separator; PAXgene: PAXgene Blood ccfDNA Tube; RNA Streck: Cell-Free RNA BCT; Roche: Cell-Free  
1338 DNA Collection Tube; Serum: BD Vacutainer SST II Advance Tube.

1339

1340 **Supplementary Fig. 8: Performance metrics of blood collection tubes over time at small RNA level. (a)**  
1341 Evolution of hemolysis in plasma, measured by absorbance at 414 nm with Nanodrop. **(b)** Evolution of RNA  
1342 concentration calculated based on number of endogenous counts vs RC spike-in RNA. **(c)** Evolution of sensitivity,  
1343 i.e., the number miRNAs. **(d)** Evolution of the fraction of counts mapping to miRNAs versus all counts (biotype  
1344 performance metric). **(e)** Evolution of the pairwise area left of the curve (reproducibility performance metrics). T0:  
1345 plasma prepared immediately after blood draw. T04, T16, T24, T72: plasma prepared 4, 16, 24 and 72 hours after  
1346 blood draw, respectively. Note that different donors were sampled and that tubes were processed at different time  
1347 intervals for preservation and non-preservation tubes. ACD-A: BD Vacutainer Glass ACD Solution A tube;  
1348 Biomatrix: Lbgard Blood Tube; Citrate: Vacuette Tube 9 ml 9NC Coagulation sodium citrate 3.2%; DNA Streck:  
1349 Cell-Free DNA BCT; EDTA: BD Vacutainer Plastic K2EDTA tube; EDTA separator: Vacuette Tube 8 ml K2E  
1350 K2EDTA Separator; PAXgene: PAXgene Blood ccfDNA Tube; RNA Streck: Cell-Free RNA BCT; Roche: Cell-Free  
1351 DNA Collection Tube; Serum: BD Vacutainer SST II Advance Tube.

1352

1353 **Supplementary Fig. 9: Example of hemolysis in preservation tubes. (a)** Visual inspection of non-preservation  
1354 plasma tubes of donor 7 (Supplementary Fig. 7a and Supplementary Fig. 8a) and (b) of preservation plasma tubes  
1355 of donor 5 (Supplementary Fig. 7a and Supplementary Fig. 8a) at time interval T0. For donor 5, plasma from the  
1356 PAXgene, RNA Streck and Roche tube showed to be hemolytic, which is in line with the NanoDrop measurements  
1357 (Supplementary Fig. 7a and Supplementary Fig. 8a). ACD-A: BD Vacutainer Glass ACD Solution A tube;  
1358 Biomatrix: Lbgard Blood Tube; Citrate: Vacuette Tube 9 ml 9NC Coagulation sodium citrate 3.2%; DNA Streck:  
1359 Cell-Free DNA BCT; EDTA: BD Vacutainer Plastic K2EDTA tube; EDTA separator: Vacuette Tube 8 ml K2E  
1360 K2EDTA Separator; PAXgene: PAXgene Blood ccfDNA Tube; RNA Streck: Cell-Free RNA BCT; Roche: Cell-Free  
1361 DNA Collection Tube.

1362

1363 **Supplementary Fig. 10: Fold changes over time at mRNA level for each blood collection tube performance**  
1364 **metric. (a)** Boxplot of the fold change within each donor across time intervals, per tube, for hemolysis as measured  
1365 by absorbance at 414 nm with Nanodrop. **(b)** Boxplot of fold change of plasma RNA concentration, based on the  
1366 ratio of endogenous vs Sequin spike-in RNA reads. **(c)** Boxplot of the fold change of the sensitivity, i.e., the number  
1367 of genes after filtering out genes with counts fewer than 6 reads. **(d)** Reproducibility, i.e., area left of the curve,  
1368 transformed from log<sub>2</sub> to linear scale. **(e)** Boxplot of the fold change of the fraction of the counts mapping to protein  
1369 coding genes versus all counts (biotype performance metric). In the boxplots, the lower and upper hinge of the  
1370 boxes represents the 25th and 75th percentile, respectively. The whiskers extend to the lowest and highest value  
1371 that is within 1.5 times the interquartile range. Data beyond the end of the whiskers are outliers. The white triangle  
1372 on the boxplot corresponds to the mean of the fold change. Individual data points are shown as colored dots (for

1373 non-preservation tubes) or triangles (for preservation tubes). The first time interval corresponds to the comparison  
1374 of T04 versus T0 (non-preservation tubes) or T24 versus T0 (preservation tubes). The second time interval  
1375 corresponds to the comparison of T16 versus T0 (non-preservation tubes) or T72 vs T0 (preservation tubes). T0:  
1376 plasma prepared immediately after blood draw. T04, T16, T24, T72: plasma prepared 4, 16, 24 and 72 hours after  
1377 blood draw, respectively. Note that different donors were sampled and that tubes were processed at different time  
1378 intervals for preservation and non-preservation tubes. ACD-A: BD Vacutainer Glass ACD Solution A tube;  
1379 Biomatrix: LBGard Blood Tube; Citrate: Vacuette Tube 9 ml 9NC Coagulation sodium citrate 3.2%; DNA Streck:  
1380 Cell-Free DNA BCT; EDTA: BD Vacutainer Plastic K2EDTA tube; EDTA separator: Vacuette Tube 8 ml K2E  
1381 K2EDTA Separator; PAXgene: PAXgene Blood ccfDNA Tube; RNA Streck: Cell-Free RNA BCT; Roche: Cell-Free  
1382 DNA Collection Tube; Serum: BD Vacutainer SST II Advance Tube.

1383

1384 **Supplementary Fig. 11: Fold changes over time at small RNA level for each blood collection tube**  
1385 **performance metric.** (a) Boxplot of the fold change within each donor across time intervals, per tube, for hemolysis,  
1386 as measured by absorbance at 414 nm with Nanodrop. (b) Boxplot of fold change of plasma RNA concentration,  
1387 based on the ratio of endogenous vs RC spike-in RNA reads. (c) Boxplot of the fold change of the sensitivity, i.e.,  
1388 the number of miRNAs after filtering out miRNAs with counts fewer than 3 reads. (d) Reproducibility, i.e., area left  
1389 of the curve, transformed from log<sub>2</sub> to linear scale. (e) Boxplot of the fold change of the fraction of the counts  
1390 mapping to miRNAs versus all counts (biotype performance metric). In the boxplots, the lower and upper hinge of  
1391 the boxes represents the 25th and 75th percentile, respectively. The whiskers extend to the lowest and highest  
1392 value that is within 1.5 times the interquartile range. Data beyond the end of the whiskers are outliers. The white  
1393 triangle on the boxplot corresponds to the mean of the fold change. Individual data points are shown as colored  
1394 dots (for non-preservation tubes) or triangles (for preservation tubes). The first time interval corresponds to the  
1395 comparison of T04 versus T0 (non-preservation tubes) or T24 versus T0 (preservation tubes). The second time  
1396 interval corresponds to the comparison of T16 versus T0 (non-preservation tubes) or T72 vs T0 (preservation  
1397 tubes). T0: plasma prepared immediately after blood draw. T04, T16, T24, T72: plasma prepared 4, 16, 24 and 72  
1398 hours after blood draw, respectively. Note that different donors were sampled and that tubes were processed at  
1399 different time intervals for preservation and non-preservation tubes. ACD-A: BD Vacutainer Glass ACD Solution A  
1400 tube; Biomatrix: LBGard Blood Tube; Citrate: Vacuette Tube 9 ml 9NC Coagulation sodium citrate 3.2%; DNA  
1401 Streck: Cell-Free DNA BCT; EDTA: BD Vacutainer Plastic K2EDTA tube; EDTA separator: Vacuette Tube 8 ml K2E  
1402 K2EDTA Separator; PAXgene: PAXgene Blood ccfDNA Tube; RNA Streck: Cell-Free RNA BCT; Roche: Cell-Free  
1403 DNA Collection Tube; Serum: BD Vacutainer SST II Advance Tube.

1404

1405 **Supplementary Fig. 12: Total number of circular and linear reads relative to T0.** Each white dot with colored  
1406 outline represents the number of reads relative to the same donor's T0 tube. The fully colored dots represent the  
1407 average relative number of reads and 95% confidence intervals are shown. Each plot represents a different tube  
1408 type. The relative number of linear and circular reads are calculated by multiplying the fraction of the endogenous  
1409 RNA reads and the Sequin spikes by the fraction of linear or circRNA reads, respectively. T0: plasma prepared  
1410 immediately after blood draw. T04, T16, T24, T72: plasma prepared 4, 16, 24 and 72 hours after blood draw,  
1411 respectively. Note that different donors were sampled and that tubes were processed at different time intervals for  
1412 preservation and non-preservation tubes. ACD-A: BD Vacutainer Glass ACD Solution A tube; Biomatrix: LBgard  
1413 Blood Tube; Citrate: Vacurette Tube 9 ml 9NC Coagulation sodium citrate 3.2%; DNA Streck: Cell-Free DNA BCT;  
1414 EDTA: BD Vacutainer Plastic K2EDTA tube; EDTA separator: Vacurette Tube 8 ml K2E K2EDTA Separator;  
1415 PAXgene: PAXgene Blood ccfDNA Tube; RNA Streck: Cell-Free RNA BCT; Roche: Cell-Free DNA Collection Tube;  
1416 Serum: BD Vacutainer SST II Advance Tube.

1417  
1418 **Supplementary Fig. 13: RNA abundance levels differ across blood collection tubes.** Using normalized and  
1419 scaled count data, gene abundance levels (i.e., mean abundance of the tube replicates) are shown for each tube  
1420 type at time interval T0. The normalised counts are scaled between -1 (low abundance) and 1 (high abundance)  
1421 per gene to make abundance differences across genes comparable. Only genes with  $\geq 10$  counts in all three  
1422 replicates of one tube type were included. T0: plasma prepared immediately after blood draw. Note that different  
1423 donors were sampled for preservation and non-preservation tubes. ACD-A: BD Vacutainer Glass ACD Solution A  
1424 tube; Biomatrix: LBgard Blood Tube; Citrate: Vacurette Tube 9 ml 9NC Coagulation sodium citrate 3.2%; DNA  
1425 Streck: Cell-Free DNA BCT; EDTA: BD Vacutainer Plastic K2EDTA tube; EDTA separator: Vacurette Tube 8 ml K2E  
1426 K2EDTA Separator; PAXgene: PAXgene Blood ccfDNA Tube; RNA Streck: Cell-Free RNA BCT; Roche: Cell-Free  
1427 DNA Collection Tube; Serum: BD Vacutainer SST II Advance Tube.

1428  
1429 **Supplementary Fig. 14: RNA abundance levels differ across time intervals.** For each blood collection tube in  
1430 exRNAQC phase 1 (a) and 2 (b), distributions of log<sub>2</sub> fold changes between time interval 1 and 0 (T0), and time  
1431 interval 2 and 0 (T0) are shown. For the non-preservation tubes, time interval 1 corresponds to T04 and time interval  
1432 2 to T16. For the preservation tubes, time interval 1 corresponds to T24 and time interval 2 to T72. T0: plasma  
1433 prepared immediately after blood draw. T04, T16, T24, T72: plasma prepared 4, 16, 24 and 72 hours after blood  
1434 draw, respectively. Note that different donors were sampled and that tubes were processed at different time intervals  
1435 for preservation and non-preservation tubes. ACD-A: BD Vacutainer Glass ACD Solution A tube; Biomatrix:  
1436 LBgard Blood Tube; Citrate: Vacurette Tube 9 ml 9NC Coagulation sodium citrate 3.2%; DNA Streck: Cell-Free DNA  
1437 BCT; EDTA: BD Vacutainer Plastic K2EDTA tube; EDTA separator: Vacurette Tube 8 ml K2E K2EDTA Separator;

1438 PAXgene: PAXgene Blood ccfDNA Tube; RNA Streck: Cell-Free RNA BCT; Roche: Cell-Free DNA Collection Tube;  
1439 Serum: BD Vacutainer SST II Advance Tube.

1440

1441 **Supplementary Fig. 15: Kit selection for exRNAQC phase 2 for mRNA capture (a) and small RNA (b)**  
1442 **sequencing.** Median robust z-score (see Methods) per kit-input volume combination (13 in a, 15 in b) shown for  
1443 sensitivity and reproducibility metrics; Number that follows the abbreviation of the purification kit is the plasma input  
1444 volume (in ml).

1445

1446 **Supplementary Fig. 16: Data access through the R2 Genomics Analysis and Visualization Platform enables**  
1447 **browsable result access for any researcher to mine and analyze the exRNAQC data.** Shown are abundance  
1448 levels of a gene (C5AR1), identified by the gene set enrichment analyses on the data of exRNAQC phase 2 as  
1449 differentially abundant between time interval T0 and T16 in EDTA. Following the settings in the upper panel to 'View  
1450 a gene in groups', this can be nicely visualized in R2 (lower panel). Red panel is Citrate, green is EDTA, purple is  
1451 Serum. In the annotation track 'hours\_to\_start\_processing', red represents T0, green T04, and blue T16. Mouse  
1452 hover actions enable to visualize these annotations on the online platform.

1453

1454 **Supplementary Information**

1455

Fig. 1

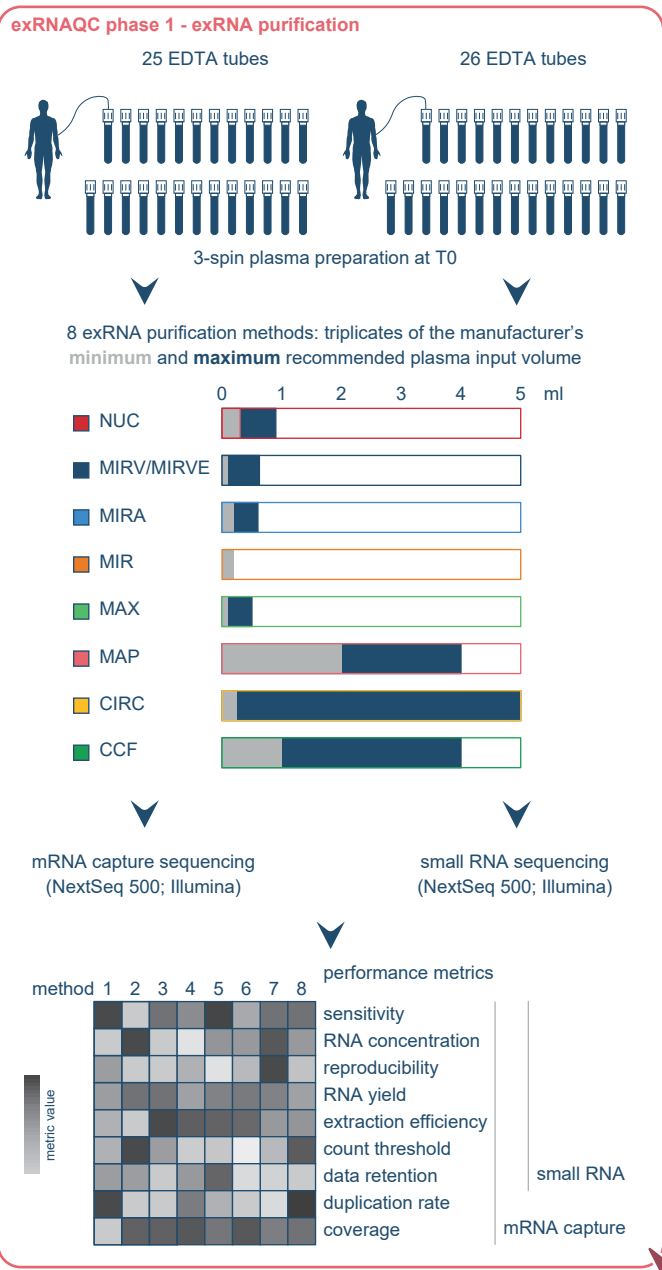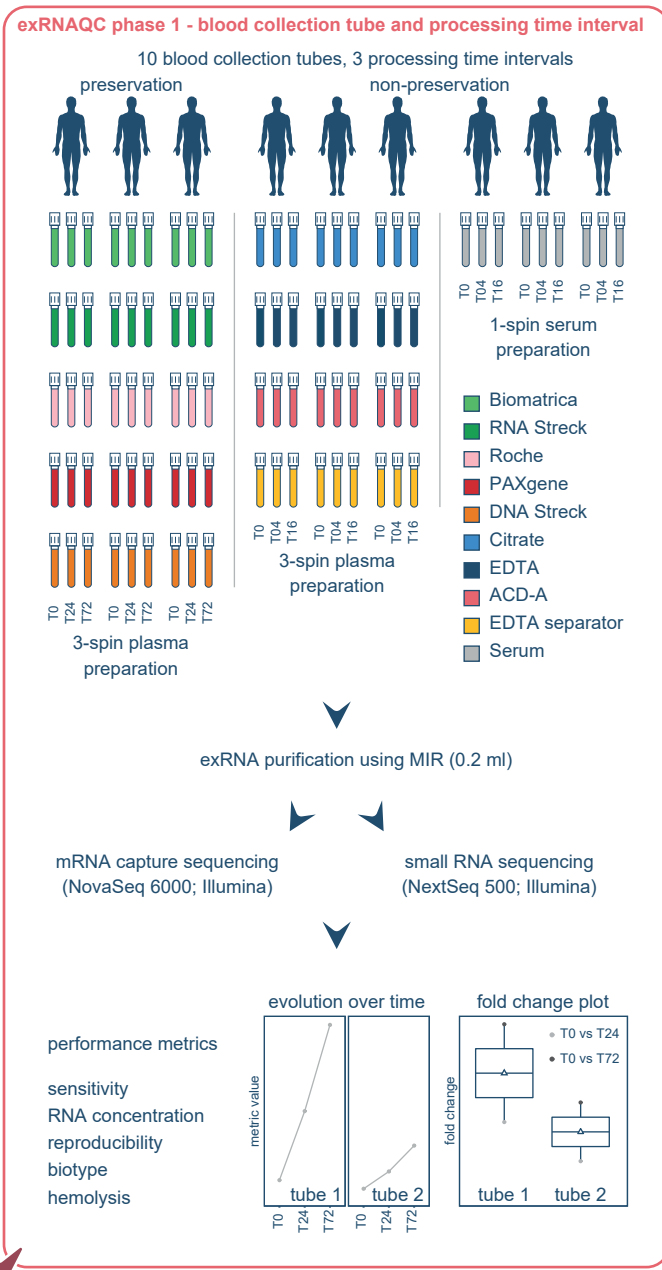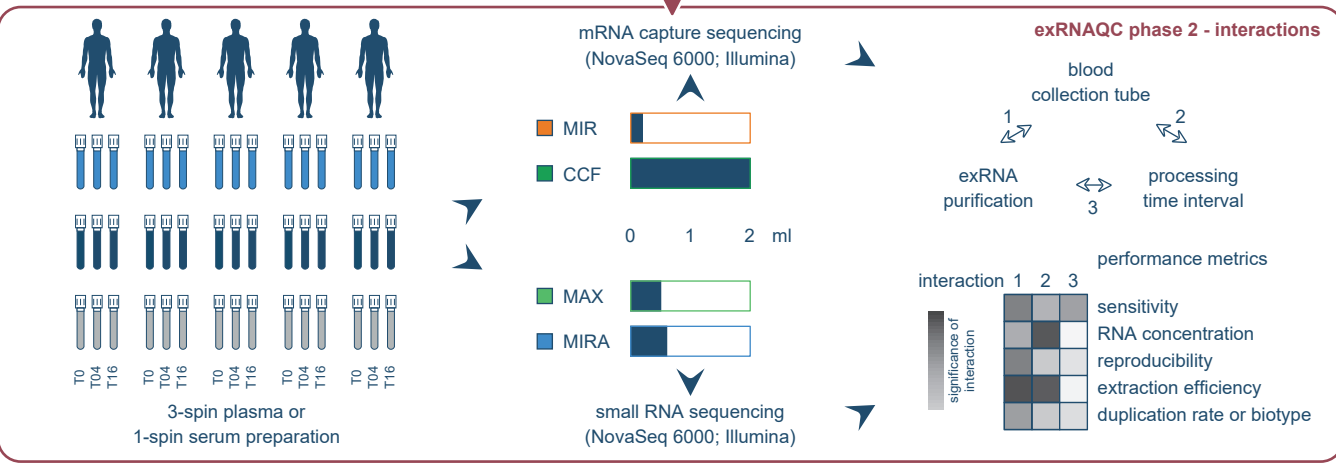

**Fig. 2**

- miRNeasy Serum/Plasma Advanced Kit (MIRA)
- Plasma/Serum Circulating and Exosomal RNA Purification Kit/Slurry Format (CIRC)
- mirVana PARIS Kit with purification protocol for RNA enriched for small RNAs (MIRVE)
- NucleoSpin miRNA Plasma Kit (NUC)
- miRNeasy Serum/Plasma Kit (MIR)
- QIAzol Lysis Reagent (QIAzol)
- QIAzol Lysis Reagent (QIAzol)
- mirVana PARIS Kit (MIRV)
- Maxwell RSC miRNA Plasma and Serum Purification Instrument (MAX)

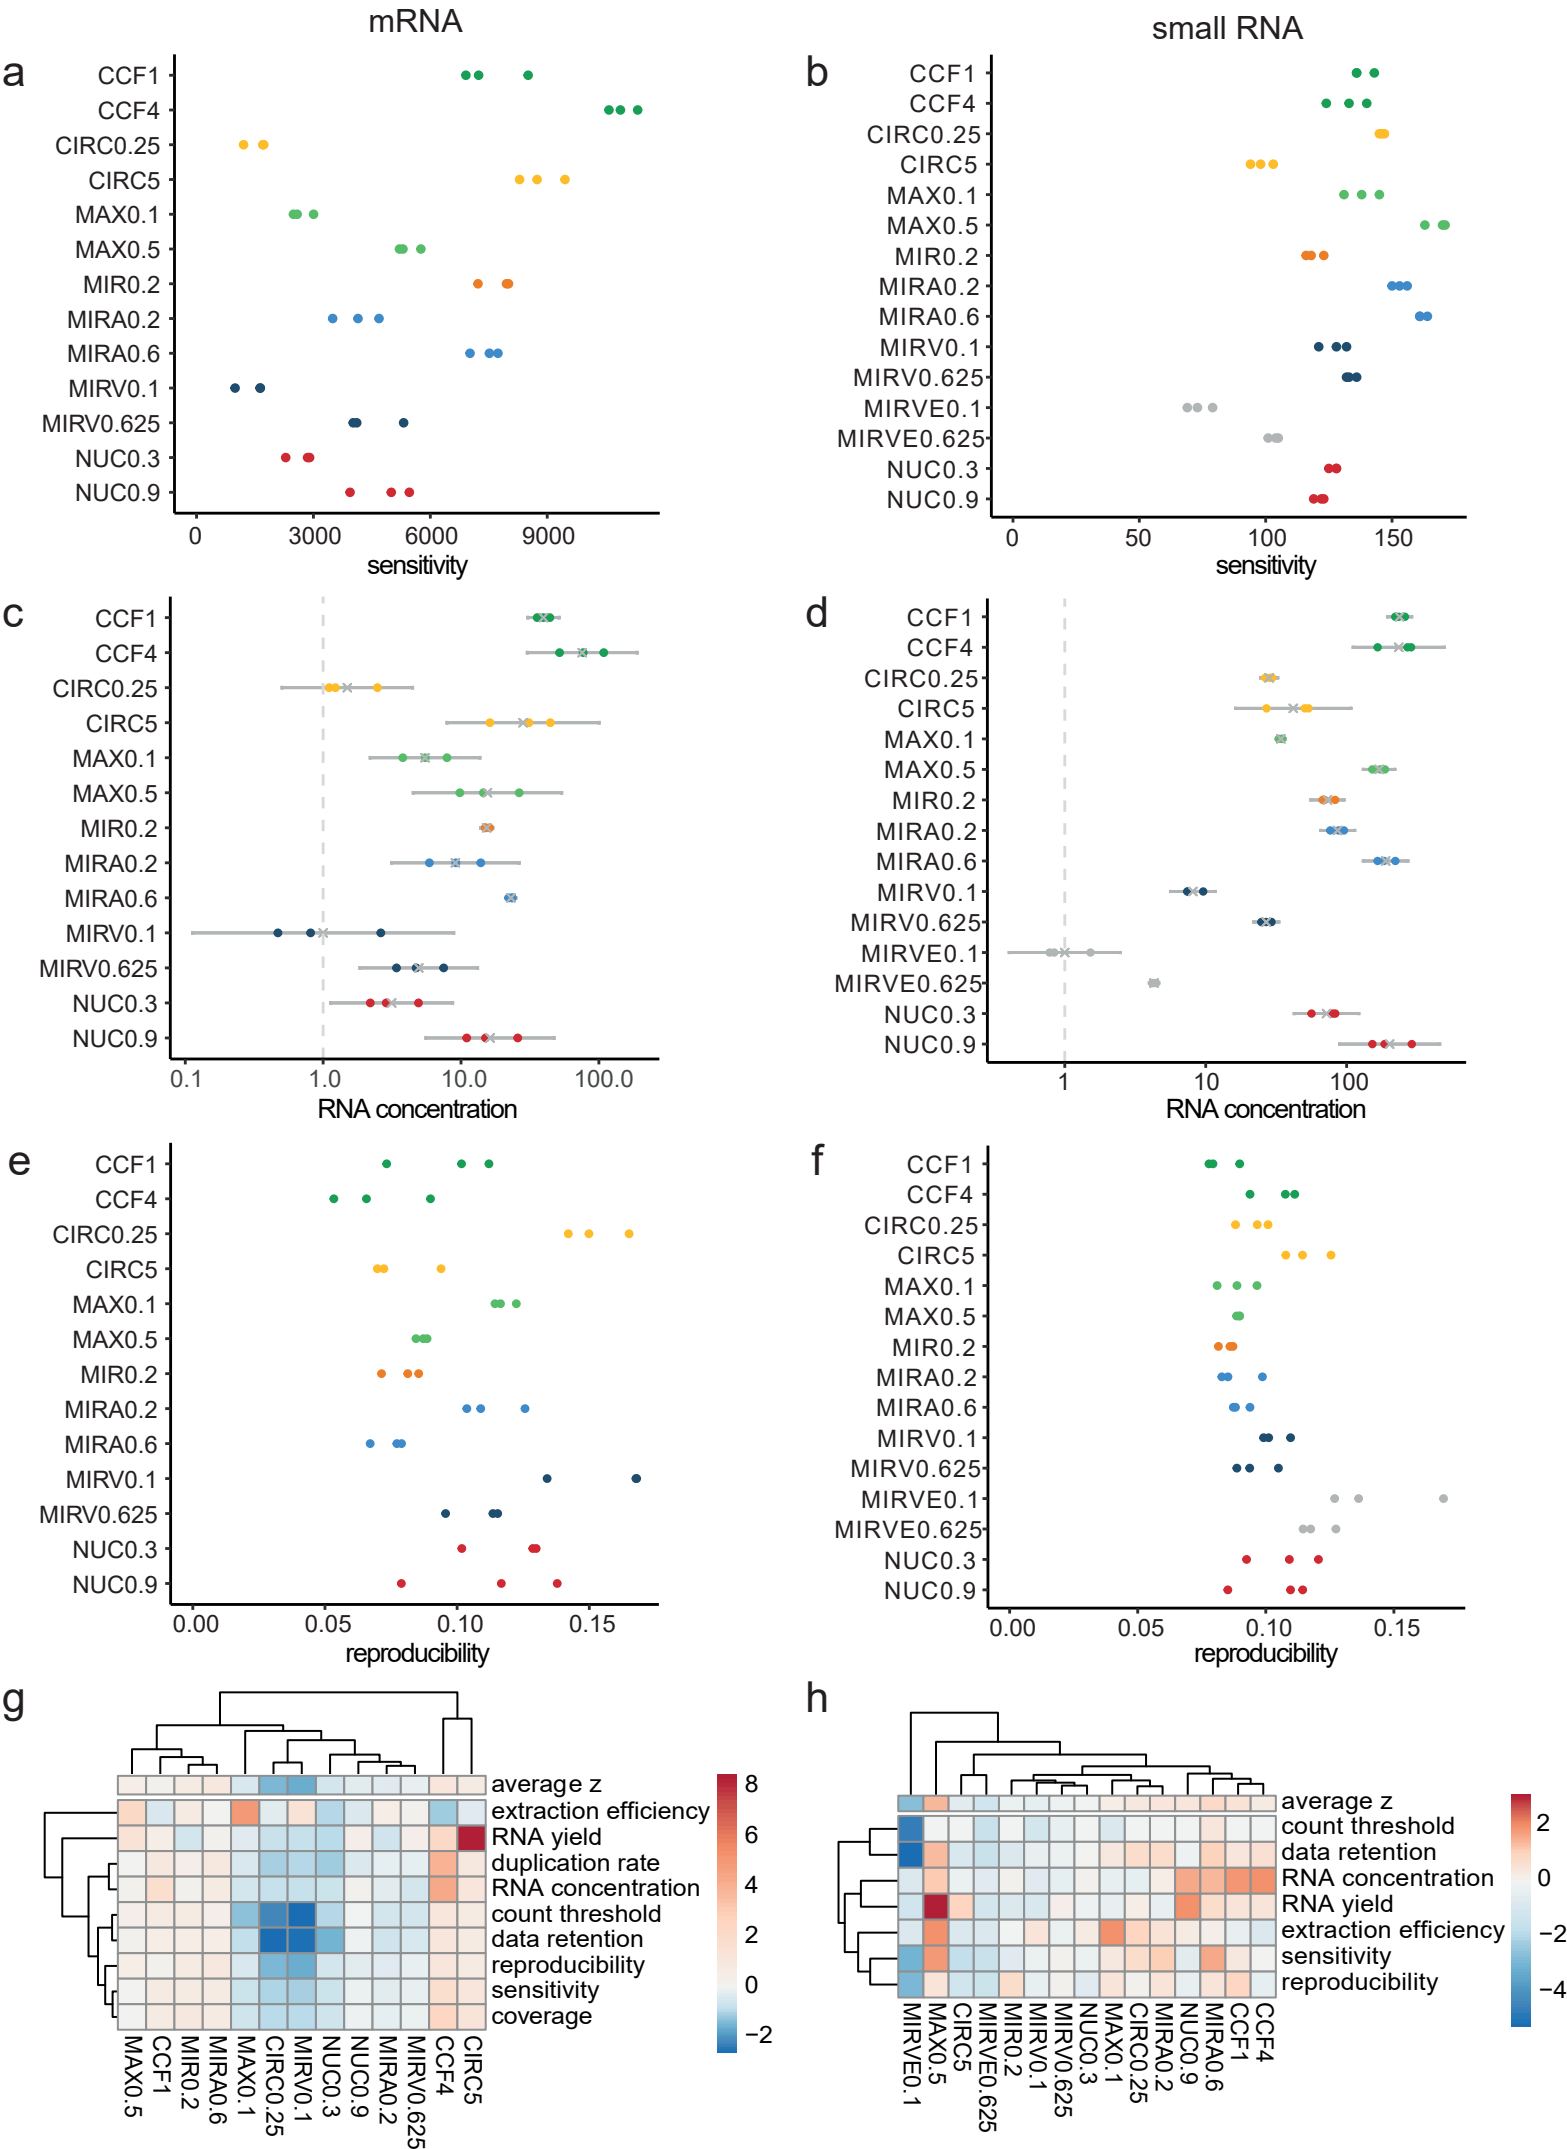



Fig. 3

reproducibility      biotype      sensitivity      hemolysis      RNA concentration

mRNA

small RNA

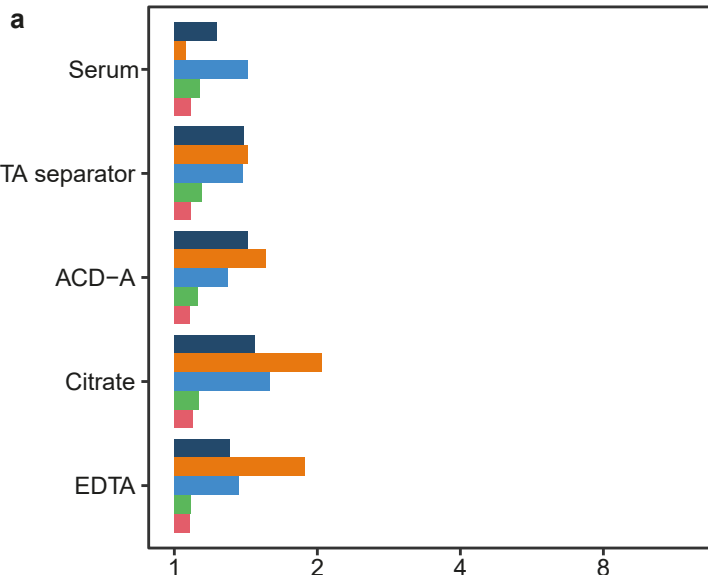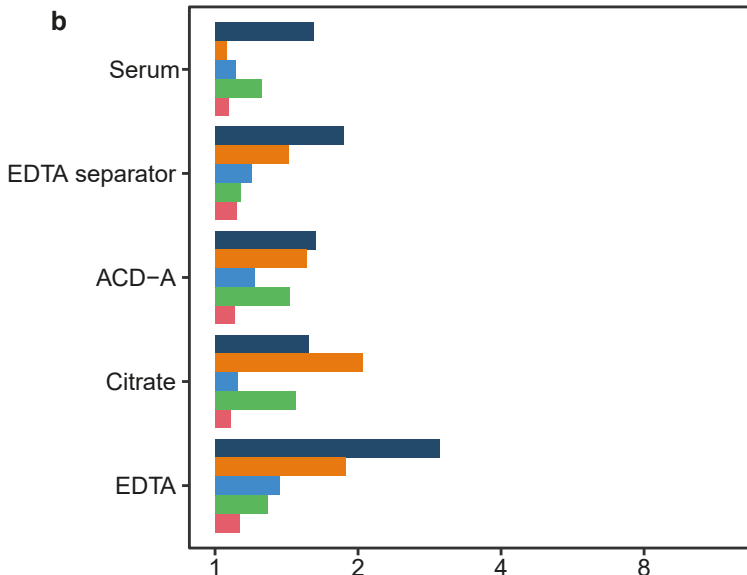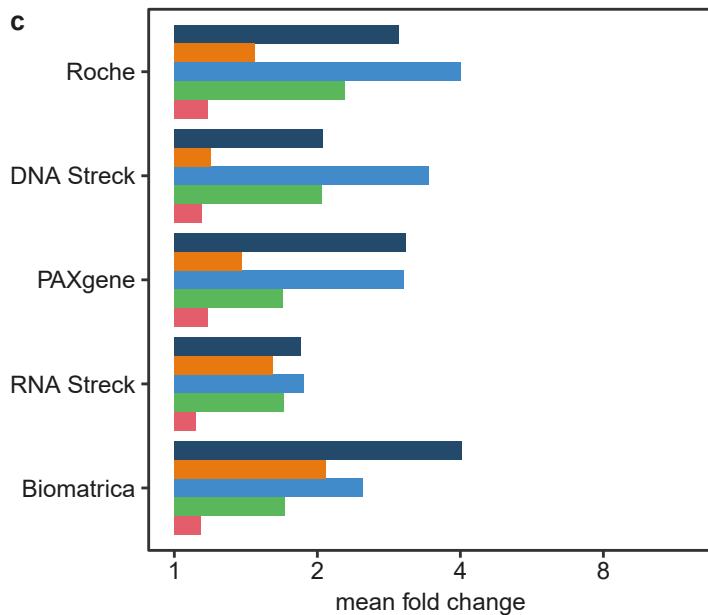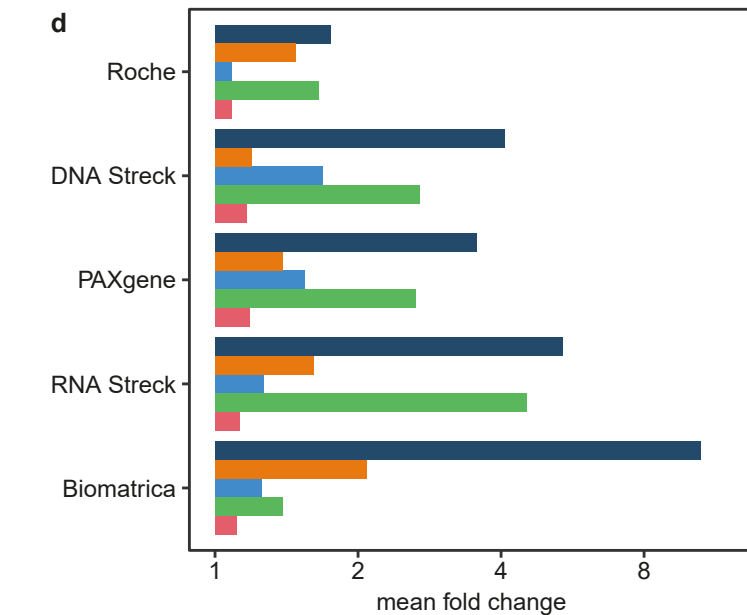

Fig. 4

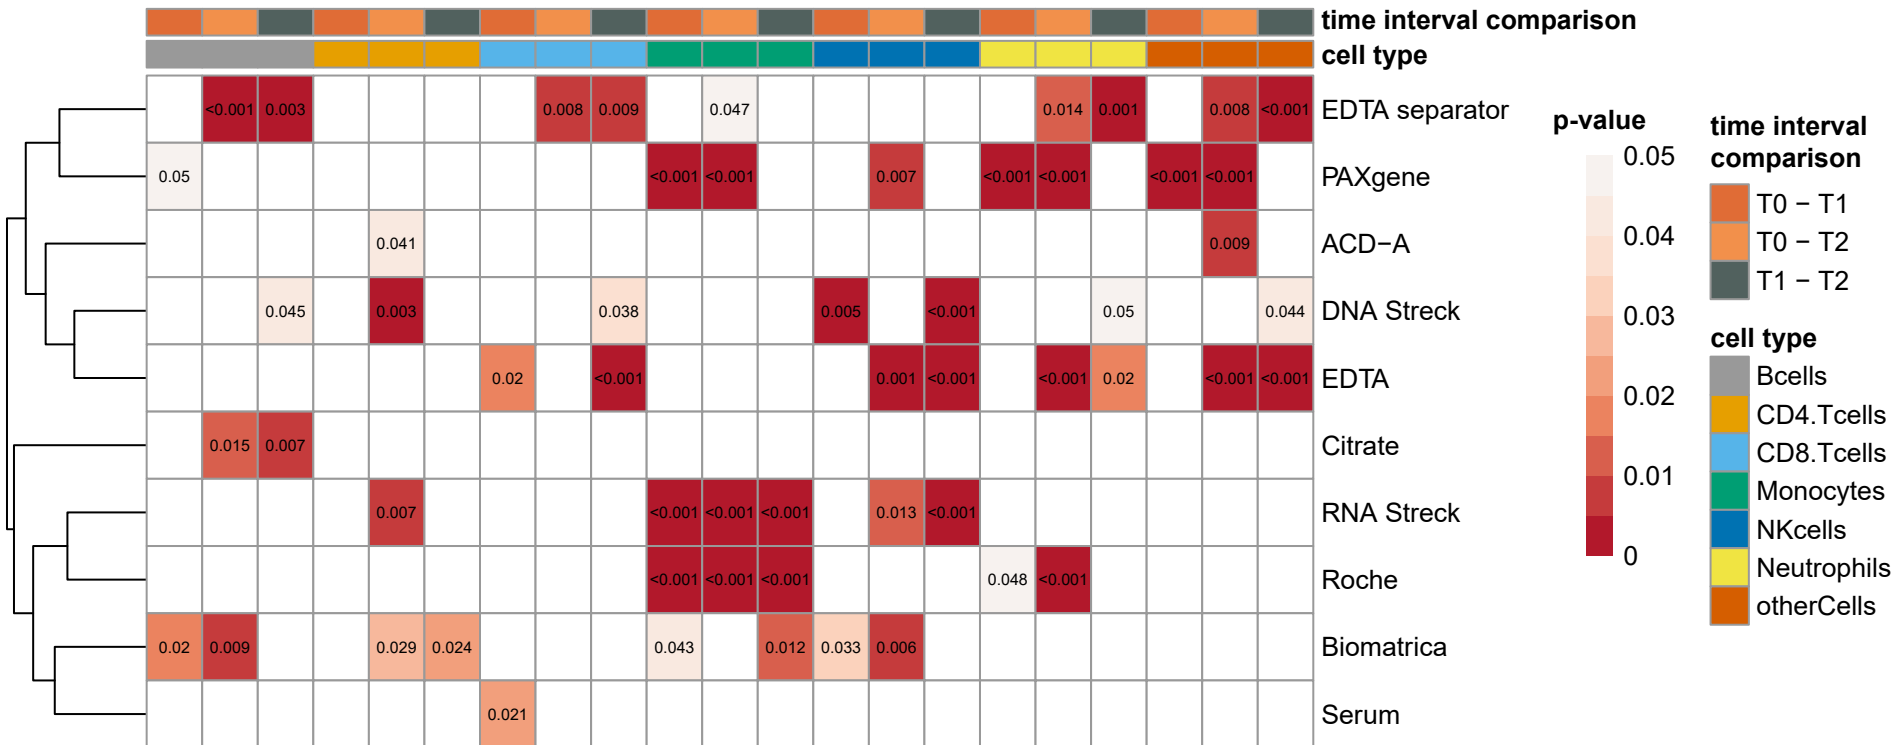

# Fig. 5

## a

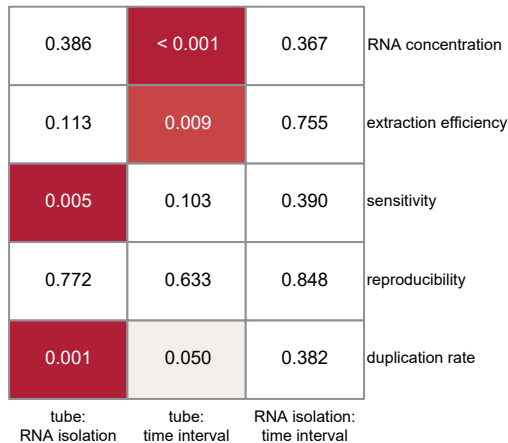

## b

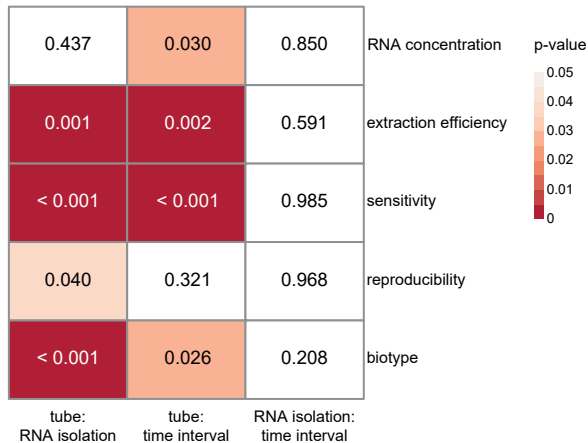

## c

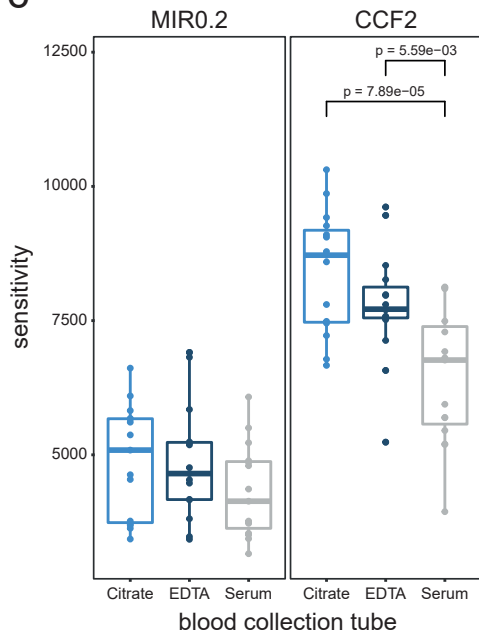

## d

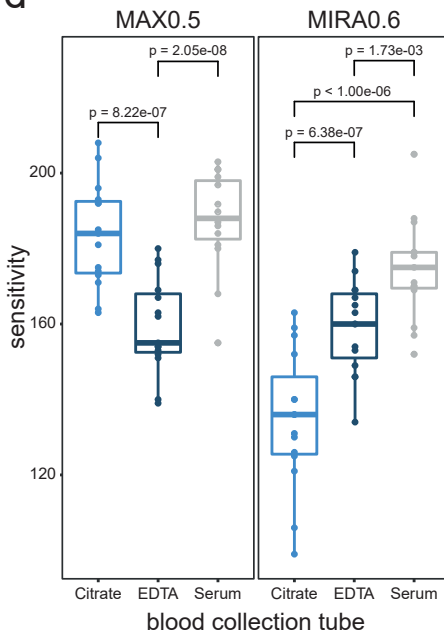

Source: https://www.biorxiv.org/content/10.1101/2021.05.11.442610.full.pdf
