# Supplementary material for: Performance evaluation of RNA purification kits and blood collection tubes in the Extracellular RNA Quality Control (exRNAQC) study
Source: bioRxiv preprint, doi:10.1101/2021.05.11.442610, version 2 (2022-12-27)
Supplement: Supplementary Table 4 [file 442610_file27.xlsx]

## Sheet: EDTAT0vsT16
pathway	pval	padj	log2err	NES	leadingEdge
REACTOME_IMMUNOREGULATORY_INTERACTIONS_BETWEEN_A_LYMPHOID_AND_A_NON_LYMPHOID_CELL	5.42239e-08	2.10931e-05	0.719513	2.2619	HLA-C, SELL, HLA-A, HLA-F, HLA-B, ITGB2, IFITM1, ITGAL, FCGR3A, TYROBP, JAML, HLA-E, B2M, ITGB1, CD3E, ICAM3, ITGA4
REACTOME_NEUTROPHIL_DEGRANULATION	3.11542e-06	0.00060595	0.627257	1.92488	ITGAX, ADGRE5, FCGR2A, HLA-C, SELL, HLA-A, FCN1, HLA-B, ITGB2, FCGR3B, S100A9, CTSS, PTPRC, ATP11B, LYZ, PSAP, HSPA1A, ITGAL, S100A8, CCT8, S100A11, GSN, TYROBP, OSTF1, B2M, FTH1, CTSB, SDCBP, CD44, GMFG, ACTR2, BIN2, MNDA, IQGAP1, COTL1, CCT2, UBR4, VCP, NME2, PYGL, PTPRJ
REACTOME_EXTRACELLULAR_MATRIX_ORGANIZATION	2.27274e-05	0.00294699	0.57561	2.06366	ITGAX, ITGB2, CTSS, PPIB, VCAN, ITGAL, ITGB1, TGFB1, CTSB, ICAM3, ITGA4, CD44
REACTOME_INNATE_IMMUNE_SYSTEM	3.69106e-05	0.00358956	0.557332	1.69408	FOS, ITGAX, NFKBIA, ADGRE5, FCGR2A, HLA-C, SELL, HLA-A, FCN1, HLA-B, ITGB2, FCGR3B, S100A9, CTSS, PTPRC, ATP11B, LYZ, PSAP, HSPA1A, ITGAL, S100A8, FCGR3A, CCT8, HSP90B1, S100A11, GSN, TYROBP, UBC, OSTF1, HLA-E, B2M, MALT1, MYO5A, NCF1, FTH1, DNM2, CTSB, LCP2, SDCBP, ICAM3, CD44, GMFG, LRRFIP1, PIK3R1, ACTR2, BIN2, CDC42, LYN, MNDA, IQGAP1, COTL1, CCT2, UBR4, VCP, NME2, PYGL, PTPRJ, TAX1BP1, MYO9B…
KEGG_CELL_ADHESION_MOLECULES_CAMS	0.000141149	0.0109814	0.518848	1.97281	HLA-C, SELL, HLA-A, HLA-F, HLA-B, ITGB2, PTPRC, VCAN, ITGAL, HLA-E, ITGB1, ICAM3, ITGA4
REACTOME_ANTIGEN_PROCESSING_CROSS_PRESENTATION	0.000424247	0.0275054	0.498493	1.91328	HLA-C, HLA-A, HLA-F, HLA-B, S100A9, CTSS, S100A8, UBC, HLA-E, B2M, CALR, NCF1
KEGG_VIRAL_MYOCARDITIS	0.000669681	0.0372151	0.477271	1.87774	HLA-C, HLA-A, HLA-F, HLA-B, ITGB2, ITGAL, HLA-E
REACTOME_INTERFERON_ALPHA_BETA_SIGNALING	0.000830002	0.0403588	0.477271	1.86259	HLA-C, HLA-A, HLA-F, IFITM2, HLA-B, IFITM1, HLA-E, IFITM3

## Sheet: CitrateT0vsT16
pathway	pval	padj	log2err	NES	leadingEdge
REACTOME_CELLULAR_RESPONSE_TO_STARVATION	1.05219e-05	0.000290439	0.593325	1.89853	RPL6, RPS8, RPS27A, RPL37, RPS19, RPS10, RPS29, RPL36, RPL21, RPL4, RPS12, RPS13, RPL13, RPL29, RPS9, RPS15A, RPL36A, RPS3A, RPS17, RPL24, RPS18, RPS16, RPL5, RPS6, FAU, RPS20, RPS28, RPL26, RPL34, RPL27A, RPL11, RPL10A, RPL37A, RPL15, RPL31, RPL35A, RPL14, RPS14, RPL32, UBA52, RPS25, RPL19, RPL9, RPS4X, RPL38, RPL35, RPL23, RPL27, RPS27, RPS3, RPLP1, RPL18A, RPS7, RPL7, RPL13A, RPL10, RPS2, RPS2…
REACTOME_EUKARYOTIC_TRANSLATION_ELONGATION	8.09334e-06	0.000290439	0.593325	1.93445	RPL6, RPS8, RPS27A, RPL37, RPS19, RPS10, RPS29, RPL36, RPL21, RPL4, RPS12, RPS13, RPL13, RPL29, RPS9, RPS15A, RPL36A, RPS3A, RPS17, RPL24, RPS18, RPS16, RPL5, RPS6, FAU, RPS20, RPS28, RPL26, RPL34, RPL27A, RPL11, RPL10A, RPL37A, RPL15, EEF1B2, RPL31, RPL35A, RPL14, RPS14, RPL32, EEF1D, UBA52, RPS25, RPL19, RPL9, EEF1A1, RPS4X, RPL38, RPL35, RPL23, RPL27, RPS27, RPS3, RPLP1, RPL18A, RPS7, RPL7, RP…
REACTOME_EUKARYOTIC_TRANSLATION_INITIATION	6.41438e-06	0.000290439	0.610527	1.904	RPL6, EIF3D, RPS8, RPS27A, RPL37, RPS19, RPS10, RPS29, RPL36, RPL21, RPL4, RPS12, RPS13, RPL13, RPL29, RPS9, RPS15A, RPL36A, RPS3A, RPS17, RPL24, RPS18, RPS16, RPL5, RPS6, FAU, RPS20, EIF3M, RPS28, RPL26, RPL34, RPL27A, RPL11, RPL10A, RPL37A, RPL15, EIF4A2, RPL31, RPL35A, RPL14, RPS14, RPL32, UBA52, RPS25, RPL19, RPL9, RPS4X, RPL38, RPL35, EIF3G, RPL23, RPL27, EIF3H, RPS27, RPS3, RPLP1, RPL18A, R…
REACTOME_METABOLISM_OF_AMINO_ACIDS_AND_DERIVATIVES	8.56478e-06	0.000290439	0.593325	1.90492	RARS1, RPL6, GLUD1, RPS8, RPS27A, RPL37, RPS19, RPS10, RPS29, RPL36, RPL21, RPL4, RPS12, RPS13, RPL13, RPL29, RPS9, RPS15A, RPL36A, RPS3A, RPS17, RPL24, RPS18, RPS16, GLUL, RPL5, RPS6, FAU, RPS20, RPS28, RPL26, RPL34, RPL27A, RPL11, RPL10A, RPL37A, RPL15, RPL31, RPL35A, RPL14, RPS14, RPL32, UBA52, RPS25, RPL19, RPL9, RPS4X, RPL38, RPL35, RPL23, RPL27, RPS27, RPS3, RPLP1, RPL18A, RPS7, RPL7, RPL13…
REACTOME_RESPONSE_OF_EIF2AK4_GCN2_TO_AMINO_ACID_DEFICIENCY	1.05219e-05	0.000290439	0.593325	1.89853	RPL6, RPS8, RPS27A, RPL37, RPS19, RPS10, RPS29, RPL36, RPL21, RPL4, RPS12, RPS13, RPL13, RPL29, RPS9, RPS15A, RPL36A, RPS3A, RPS17, RPL24, RPS18, RPS16, RPL5, RPS6, FAU, RPS20, RPS28, RPL26, RPL34, RPL27A, RPL11, RPL10A, RPL37A, RPL15, RPL31, RPL35A, RPL14, RPS14, RPL32, UBA52, RPS25, RPL19, RPL9, RPS4X, RPL38, RPL35, RPL23, RPL27, RPS27, RPS3, RPLP1, RPL18A, RPS7, RPL7, RPL13A, RPL10, RPS2, RPS2…
REACTOME_SELENOAMINO_ACID_METABOLISM	1.16162e-05	0.000290439	0.593325	1.89363	RARS1, RPL6, RPS8, RPS27A, RPL37, RPS19, RPS10, RPS29, RPL36, RPL21, RPL4, RPS12, RPS13, RPL13, RPL29, RPS9, RPS15A, RPL36A, RPS3A, RPS17, RPL24, RPS18, RPS16, RPL5, RPS6, FAU, RPS20, RPS28, RPL26, RPL34, RPL27A, RPL11, RPL10A, RPL37A, RPL15, RPL31, RPL35A, RPL14, RPS14, RPL32, UBA52, RPS25, RPL19, RPL9, RPS4X, RPL38, RPL35, RPL23, RPL27, RPS27, RPS3, RPLP1, RPL18A, RPS7, RPL7, RPL13A, RPL10, RPS…
REACTOME_SRP_DEPENDENT_COTRANSLATIONAL_PROTEIN_TARGETING_TO_MEMBRANE	1.30534e-05	0.000290439	0.593325	1.88601	RPL6, RPS8, RPS27A, RPL37, RPS19, RPS10, RPS29, RPL36, RPL21, RPL4, RPS12, RPS13, RPL13, RPL29, RPS9, RPS15A, RPL36A, RPS3A, RPS17, RPL24, RPS18, RPS16, RPL5, RPS6, FAU, RPS20, RPS28, RPL26, RPL34, RPL27A, RPL11, RPL10A, RPL37A, RPL15, RPL31, RPL35A, RPL14, RPS14, RPL32, UBA52, RPS25, RPL19, RPL9, RPS4X, RPL38, RPL35, RPL23, RPL27, RPS27, RPS3, RPLP1, RPL18A, RPS7, RPL7, RPL13A, RPL10, RPS2, RPS2…
REACTOME_TRANSLATION	2.21192e-06	0.000290439	0.627257	1.92255	RARS1, RPL6, EIF3D, RPS8, RPS27A, RPL37, RPS19, RPS10, RPS29, RPL36, RPL21, RPL4, RPS12, RPS13, RPL13, RPL29, RPS9, RPS15A, RPL36A, RPS3A, RPS17, RPL24, RPS18, RPS16, RPL5, RPS6, FAU, RPS20, EIF3M, RPS28, RPL26, RPL34, RPL27A, RPL11, RPL10A, RPL37A, RPL15, EIF4A2, EEF1B2, RPL31, RPL35A, RPL14, RPS14, RPL32, EEF1D, UBA52, RPS25, RPL19, RPL9, EEF1A1, RPS4X, RPL38, RPL35, EIF3G, RPL23, RPL27, EIF3H,…
KEGG_RIBOSOME	1.6005e-05	0.000316544	0.57561	1.88556	RPL6, RPS8, RPS27A, RPL37, RPS19, RPS10, RPS29, RPL36, RPL21, RPL4, RPS12, RPS13, RPL13, RPL29, RPS9, RPS15A, RPL36A, RPS3A, RPS17, RPL24, RPS18, RPS16, RPL5, RPS6, FAU, RPS20, RPS28, RPL26, RPL34, RPL27A, RPL11, RPL10A, RPL37A, RPL15, RPL31, RPL35A, RPL14, RPL32, UBA52, RPS25, RPL19, RPL9, RPS4X, RPL38, RPL35, RPL23, RPL27, RPS27, RPS3, RPLP1, RPL18A, RPS7, RPL7, RPL13A, RPL10, RPS2, RPS24, RPL1…
REACTOME_RRNA_PROCESSING	1.97633e-05	0.000351786	0.57561	1.87868	RPL6, RPS8, RPS27A, RPL37, RPS19, RPS10, RPS29, RPL36, RPL21, RPL4, RPS12, RPS13, RPL13, RPL29, RPS9, RPS15A, RPL36A, RPS3A, RPS17, RPL24, FBL, RPS18, RPS16, RPL5, RPS6, FAU, RPS20, RPS28, RPL26, RPL34, RPL27A, RPL11, RPL10A, RPL37A, RPL15, RPL31, RPL35A, RPL14, RPS14, RPL32, UBA52, RPS25, RPL19, RPL9, RPS4X, RPL38, RPL35, RPL23, RPL27, RPS27, RPS3, RPLP1, RPL18A, RPS7, RPL7, RPL13A, RPL10, RPS2,…
REACTOME_NONSENSE_MEDIATED_DECAY_NMD	3.39635e-05	0.000465039	0.557332	1.87074	RPL6, UPF2, RPS8, RPS27A, RPL37, RPS19, RPS10, RPS29, RPL36, RPL21, RPL4, RPS12, RPS13, RPL13, RPL29, RPS9, RPS15A, RPL36A, RPS3A, RPS17, RPL24, RPS18, RPS16, RPL5, RPS6, FAU, RPS20, RPS28, RPL26, RPL34, RPL27A, RPL11, RPL10A, RPL37A, RPL15, RPL31, RPL35A, RPL14, RPS14, RPL32, UBA52, RPS25, RPL19, RPL9, RPS4X, RPL38, RPL35, RPL23, RPL27, RPS27, RPS3, RPLP1, RPL18A, RPS7, RPL7, RPL13A, RPL10, RPS2…
REACTOME_REGULATION_OF_EXPRESSION_OF_SLITS_AND_ROBOS	3.13919e-05	0.000465039	0.557332	1.87079	RPL6, UPF2, RPS8, RPS27A, RPL37, RPS19, RPS10, RPS29, RPL36, RPL21, RPL4, RPS12, UBC, RPS13, RPL13, RPL29, RPS9, RPS15A, RPL36A, RPS3A, RPS17, RPL24, RPS18, RPS16, RPL5, RPS6, FAU, RPS20, RPS28, RPL26, RPL34, RPL27A, RPL11, RPL10A, UBB, RPL37A, RPL15, RPL31, RPL35A, RPL14, RPS14, RPL32, UBA52, RPS25, RPL19, RPL9, RPS4X, RPL38, RPL35, RPL23, RPL27, RPS27, RPS3, RPLP1, RPL18A, RPS7, RPL7, RPL13A, R…
REACTOME_SIGNALING_BY_ROBO_RECEPTORS	3.29932e-05	0.000465039	0.557332	1.82779	EVL, RPL6, UPF2, RPS8, RPS27A, RPL37, RPS19, RPS10, RPS29, RPL36, RPL21, RPL4, RPS12, UBC, RPS13, RPL13, RPL29, RPS9, RPS15A, RPL36A, RPS3A, RPS17, RPL24, RPS18, RPS16, RPL5, RPS6, FAU, RPS20, RPS28, RPL26, RPL34, RPL27A, RPL11, RPL10A, UBB, RPL37A, RPL15, RPL31, RPL35A, RPL14, RPS14, RPL32, UBA52, RPS25, RPL19, RPL9, RPS4X, RPL38, RPL35, CDC42, RPL23, RPL27, RPS27, RPS3, RPLP1, RPL18A, RPS7, RPL…
REACTOME_METABOLISM_OF_RNA	0.000225746	0.0028702	0.518848	1.66827	DDX5, RBMX, RPL6, HNRNPM, UPF2, SRRM2, DHX9, POLR2A, RPS8, RPS27A, HNRNPA2B1, RPL37, PAPOLA, RPS19, RPS10, RPS29, RPL36, RPL21, RPL4, RPS12, UBC, NUP98, RPS13, SNRPN, RPL13, RPL29, RPS9, RPS15A, RPL36A, RPS3A, RPS17, RPL24, FBL, RPS18, RPS16, RPL5, RPS6, FAU, RPS20, RPS28, RPL26, RPL34, RPL27A, RPL11, RPL10A, UBB, RPL37A, RPL15, EIF4A2, HNRNPC, RPL31, YBX1, RPL35A, YWHAZ, RPL14, RPS14, RPL32, UBA…
REACTOME_CHROMOSOME_MAINTENANCE	0.00070195	0.00832981	0.477271	1.79979	H2AC20, H3-3B, SMARCA5, ATRX, H2BC21, H4C2, H2AC8, POLR2A, H2BC5, NPM1, H2BC4, H4C5, H2AC6
REACTOME_DNA_REPAIR	0.00111596	0.012415	0.45506	1.83436	H2AC20, ATM, SMARCA5, H2BC21, EP300, H4C2, USP7, H2AC8, POLR2A, H2BC5, RPS27A, H2BC4, UBC, H4C5, H2AC6
REACTOME_CELLULAR_RESPONSES_TO_EXTERNAL_STIMULI	0.00133852	0.0140151	0.45506	1.56972	H2AC20, H1-4, DYNLL1, H1-3, H3-3B, ATM, ETS1, GPX1, H1-2, RPL6, UBE2D3, CAPZA2, H2BC21, EP300, H4C2, H2AC8, PTGES3, H2BC5, RPS8, RPS27A, HBA2, PHC3, RPL37, RPS19, RPS10, RPS29, RPL36, RPL21, H2BC4, DYNC1H1, RPL4, RPS12, UBC, NUP98, HBA1, RPS13, RPL13, RPL29, RPS9, RPS15A, RPL36A, RPS3A, H4C5, RPS17, RPL24, TXNIP, RPS18, RPS16, RPL5, H2AC6, RPS6, FAU, RPS20, NCF2, RPS28, RPL26, SKP1, RPL34, NCOR1,…
REACTOME_DEVELOPMENTAL_BIOLOGY	0.00262042	0.0218946	0.431708	1.5066	H2AC20, CSF3R, EVL, SPTB, H3-3B, RPL6, UPF2, H2BC21, EP300, H4C2, CAPNS1, H2AC8, POLR2A, MYL12A, H2BC5, PTPRC, RPS8, RPS27A, SDCBP, RPL37, RPS19, RPS10, RPS29, RPL36, RPL21, H2BC4, LYN, RPL4, RPS12, UBC, TYROBP, RPS13, RPL13, RPL29, RPS9, RPS15A, RPL36A, RPS3A, H4C5, RPS17, RPL24, RPS18, RPS16, RPL5, H2AC6, RPS6, FAU, RPS20, RPS28, RPL26, ARHGEF12, RPL34, NCOR1, RPL27A, RPL11, RPL10A, UBB, RPL37A…
REACTOME_INFLUENZA_INFECTION	0.00235642	0.0218946	0.431708	1.59862	RPL6, POLR2A, RPS8, RPS27A, RPL37, RPS19, RPS10, RPS29, RPL36, RPL21, RPL4, RPS12, NUP98, RPS13, RPL13, RPL29, RPS9, RPS15A, RPL36A, RPS3A, RPS17, RPL24, RPS18, RPS16, RPL5, RPS6, FAU, RPS20, RPS28, RPL26, RPL34, RPL27A, RPL11, RPL10A, CANX, RPL37A, RPL15, RPL31, RPL35A, RPL14, RPS14, RPL32, UBA52, RPS25, RPL19, RPL9, RPS4X, RPL38, XPO1, RPL35, RPL23, RPL27, RPS27, RPS3, RPLP1, RPL18A, RPS7, RPL7…
REACTOME_INHIBITION_OF_DNA_RECOMBINATION_AT_TELOMERE	0.00255505	0.0218946	0.431708	1.77504	H2AC20, H3-3B, ATRX, H2BC21, H4C2, H2AC8, POLR2A, H2BC5, H2BC4, H4C5, H2AC6
REACTOME_NERVOUS_SYSTEM_DEVELOPMENT	0.00282908	0.0218946	0.431708	1.532	EVL, SPTB, RPL6, UPF2, MYL12A, PTPRC, RPS8, RPS27A, SDCBP, RPL37, RPS19, RPS10, RPS29, RPL36, RPL21, LYN, RPL4, RPS12, UBC, TYROBP, RPS13, RPL13, RPL29, RPS9, RPS15A, RPL36A, RPS3A, RPS17, RPL24, RPS18, RPS16, RPL5, RPS6, FAU, RPS20, RPS28, RPL26, ARHGEF12, RPL34, RPL27A, RPL11, RPL10A, UBB, RPL37A, RPL15, RPL31, RPL35A, ARPC2, RPL14, RPS14, RPL32, UBA52, RPS25, DNM2, RPL19, RPL9, RPS4X, RPL38, R…
REACTOME_RUNX1_REGULATES_TRANSCRIPTION_OF_GENES_INVOLVED_IN_DIFFERENTIATION_OF_HSCS	0.00271887	0.0218946	0.431708	1.68925	H2AC20, H3-3B, H2BC21, H4C2, H2AC8, H2BC5, RPS27A, H2BC4, UBC, H4C5, H2AC6, UBB, H3-3A, UBA52
REACTOME_SENESCENCE_ASSOCIATED_SECRETORY_PHENOTYPE_SASP	0.00263835	0.0218946	0.431708	1.71779	H2AC20, H3-3B, H2BC21, H4C2, H2AC8, H2BC5, RPS27A, H2BC4, UBC, H4C5, H2AC6, UBB, H3-3A, UBA52
REACTOME_MEIOTIC_RECOMBINATION	0.00321934	0.0238768	0.431708	1.72983	H2AC20, H3-3B, ATM, H2BC21, H4C2, H2AC8, H2BC5, H2BC4, H4C5, H2AC6
REACTOME_DNA_DAMAGE_TELOMERE_STRESS_INDUCED_SENESCENCE	0.00351633	0.0250362	0.431708	1.73127	H2AC20, H1-4, H1-3, ATM, H1-2, H2BC21, H4C2, H2AC8, H2BC5, H2BC4, H4C5, H2AC6
REACTOME_TELOMERE_MAINTENANCE	0.00392108	0.0268443	0.407018	1.71962	H2AC20, H3-3B, ATRX, H2BC21, H4C2, H2AC8, POLR2A, H2BC5, H2BC4, H4C5, H2AC6
REACTOME_TCF_DEPENDENT_SIGNALING_IN_RESPONSE_TO_WNT	0.00476572	0.0314184	0.407018	1.63618	H2AC20, H3-3B, H2BC21, EP300, H4C2, H2AC8, H2BC5, RPS27A, H2BC4, USP34, UBC, H4C5, H2AC6, UBB, H3-3A, YWHAZ, UBA52, XPO1
REACTOME_ACTIVATION_OF_THE_MRNA_UPON_BINDING_OF_THE_CAP_BINDING_COMPLEX_AND_EIFS_AND_SUBSEQUENT_BINDING_TO_43S	0.00540625	0.0343683	0.407018	1.61565	EIF3D, RPS8, RPS27A, RPS19, RPS10, RPS29, RPS12, RPS13, RPS9, RPS15A, RPS3A, RPS17, RPS18, RPS16, RPS6, FAU, RPS20, EIF3M, RPS28, EIF4A2, RPS14, RPS25, RPS4X, EIF3G, EIF3H, RPS27, RPS3, RPS7, EIF4B, RPS2, RPS24, RPS5, RPS15, EIF3F, EIF2S3, RPS23
REACTOME_B_WICH_COMPLEX_POSITIVELY_REGULATES_RRNA_EXPRESSION	0.00565403	0.0347041	0.407018	1.63388	H2AC20, H3-3B, SMARCA5, H2BC21, EP300, H4C2, H2AC8, H2BC5, H2BC4, H4C5, H2AC6
REACTOME_AMYLOID_FIBER_FORMATION	0.0072207	0.0428428	0.407018	1.6616	H2AC20, H3-3B, H2BC21, H4C2, H2AC8, H2BC5, RPS27A, H2BC4, ITM2B, UBC, B2M, H4C5, H2AC6, UBB, H3-3A, UBA52
REACTOME_ACTIVATED_PKN1_STIMULATES_TRANSCRIPTION_OF_AR_ANDROGEN_RECEPTOR_REGULATED_GENES_KLK2_AND_KLK3	0.00771279	0.0440863	0.407018	1.64304	H2AC20, H3-3B, H2BC21, H4C2, H2AC8, H2BC5, H2BC4, H4C5, H2AC6, H3-3A, PKN1
REACTOME_CELLULAR_SENESCENCE	0.00792563	0.0440863	0.38073	1.661	H2AC20, H1-4, H1-3, H3-3B, ATM, ETS1, H1-2, H2BC21, H4C2, H2AC8, H2BC5, RPS27A, PHC3, H2BC4, UBC
REACTOME_ACTIVATION_OF_ANTERIOR_HOX_GENES_IN_HINDBRAIN_DEVELOPMENT_DURING_EARLY_EMBRYOGENESIS	0.00877176	0.0473143	0.38073	1.6219	H2AC20, H3-3B, H2BC21, EP300, H4C2, H2AC8, POLR2A, H2BC5, H2BC4, H4C5, H2AC6, NCOR1, H3-3A

## Sheet: SerumT0vsT4
pathway	pval	padj	log2err	NES	leadingEdge
REACTOME_RESPONSE_TO_ELEVATED_PLATELET_CYTOSOLIC_CA2	1.47867e-05	0.00746727	0.593325	2.17421	CD9, THBS1, CLU, SPARC, FERMT3, PF4, TUBA4A, ALB, ITGA2B, APLP2, TIMP1, F13A1, MMRN1, EGF, PPBP, SRGN, ABCC4, TMSB4X, VCL, CD63, APP, TAGLN2, TGFB1

## Sheet: SerumT0vsT16
pathway	pval	padj	log2err	NES	leadingEdge
KEGG_RIBOSOME	1.11742e-05	0.00248988	0.593325	-2.00429	RPL35, RPL17, RPL12, RPS28, RPS9, RPL34, RPL5, RPL23A, RPS25, UBA52, RPL7A, RPS7, RPS3A, RPL21, RPL24, RPS20, RPL27A, RPL13, RPL36, RPS23, RPS3, RPS5, RPL15, RPL11, RPS10, RPS19, RPL37A, RPL7, RPL4, FAU, RPL27, RPS6, RPS17, RPS18, RPL26, RPL6, RPL19, RPL30, RPL32, RPLP0, RPS24, RPS27A, RPS4X, RPL14, RPSA, RPL18, RPS26, RPS29, RPL22, RPL36A, RPL29, RPL13A, RPS13, RPL35A, RPL31, RPS12, RPL3, RPL23,…
REACTOME_EUKARYOTIC_TRANSLATION_ELONGATION	5.53279e-06	0.00248988	0.610527	-1.99108	RPL35, RPL17, RPL12, RPS28, RPS9, RPL34, RPL5, RPL23A, RPS25, UBA52, RPL7A, RPS7, RPS3A, RPL21, RPL24, RPS20, RPL27A, RPL13, RPL36, RPS23, RPS3, RPS5, RPL15, RPL11, RPS10, RPS19, RPL37A, RPL7, RPL4, FAU, RPL27, RPS6, RPS17, RPS18, RPL26, RPL6, RPL19, RPL30, RPL32, EEF1A1, RPLP0, RPS24, RPS27A, RPS4X, EEF2, EEF1B2, RPL14, RPSA, RPL18, RPS26, RPS29, RPL22, RPL36A, RPL29, RPL13A, RPS13, RPL35A, RPL3…
REACTOME_SELENOAMINO_ACID_METABOLISM	1.47914e-05	0.00248988	0.593325	-1.90717	TXNRD1, QARS1, SECISBP2, RPL35, RPL17, RPL12, RPS28, RPS9, RPL34, RPL5, RPL23A, RPS25, UBA52, RPL7A, RPS7, RPS3A, RPL21, RPL24, RPS20, RPL27A, RPL13, RPL36, RPS23, RPS3, LARS1, RPS5, RPL15, RPL11, RPS10, RPS19, RPL37A, IARS1, RPL7, RPL4, FAU, RPL27, RPS6, RPS17, RPS18, RPL26, KARS1, RPL6, RPL19, RPL30, RPL32, RPLP0, RPS24, RPS27A, RPS4X, RPL14, RPSA, RPL18, RPS26, RPS29, RPL22, RPL36A, RPL29, RPL…
REACTOME_EUKARYOTIC_TRANSLATION_INITIATION	0.000388702	0.0490737	0.498493	-1.6601	EIF3C, EIF2S3, EIF3D, RPL35, EIF4A2, RPL17, EIF5B, RPL12, RPS28, RPS9, RPL34, RPL5, RPL23A, RPS25, EIF3H, UBA52, RPL7A, EIF3M, RPS7, RPS3A, RPL21, RPL24, RPS20, RPL27A, RPL13, RPL36, RPS23, RPS3, EIF3B, RPS5, RPL15, RPL11, RPS10, RPS19, RPL37A, RPL7, RPL4, FAU, RPL27, RPS6, RPS17, RPS18, RPL26, RPL6, RPL19, RPL30, RPL32, RPLP0, EIF4G1, RPS24, RPS27A, RPS4X, RPL14, RPSA, RPL18, RPS26, RPS29, EIF4B…

## Sheet: EDTA separatorT0vsT4
pathway	pval	padj	log2err	NES	leadingEdge
REACTOME_EUKARYOTIC_TRANSLATION_ELONGATION	1.55623e-05	0.00306578	0.57561	1.97809	RPL34, RPL24, RPL14, RPS8, RPS25, RPS6, RPS20, RPL36A, RPS27A, RPL35A, RPL19, RPS13, RPL38, RPL35, FAU, RPS9, RPL32, RPLP1, RPS23, RPS21, RPL37, RPS14, RPS24, RPS3A, RPS15A, RPL30, RPL29, RPL5, RPL10A, RPS4X, RPS10, RPL27A, RPS18, RPL27, RPL21, RPS12, RPL11, RPL36, RPL18A, RPL36AL, RPL26, RPL31, RPL7, RPL13, RPL37A, RPL6, RPS27, RPL39, RPL18, RPL9, RPL17, RPS26, RPL13A, EEF1D, RPL10, UBA52, RPS7,…
REACTOME_SELENOAMINO_ACID_METABOLISM	8.56409e-06	0.00306578	0.593325	2.00635	RPL34, RPL24, RPL14, RPS8, RPS25, TXNRD1, RPS6, RPS20, RPL36A, RPS27A, RPL35A, RPL19, RPS13, RARS1, RPL38, LARS1, RPL35, FAU, RPS9, RPL32, RPLP1, RPS23, RPS21, RPL37, RPS14, RPS24, RPS3A, KARS1, RPS15A, RPL30, RPL29, RPL5, RPL10A, RPS4X, RPS10, DARS1, RPL27A, RPS18, RPL27, RPL21, RPS12, RPL11, RPL36, QARS1, RPL18A, RPL36AL, RPL26, RPL31, RPL7, RPL13, RPL37A, RPL6, RPS27, RPL39, RPL18, RPL9, RPL17…
KEGG_RIBOSOME	2.84671e-05	0.00373868	0.57561	1.9755	RPL34, RPL24, RPL14, RPS8, RPS25, RPS6, RPS20, RPL36A, RPS27A, RPL35A, RPL19, RPS13, RPL38, RPL35, FAU, RPS9, RPL32, RPLP1, RPS23, RPS21, RPL37, RPS24, RPS3A, RPS15A, RPL30, RPL29, RPL5, RPL10A, RPS4X, RPS10, RPL27A, RPS18, RPL27, RPL21, RPS12, RPL11, RPL36, RPL18A, RPL36AL, RPL26, RPL31, RPL7, RPL13, RPL37A, RPL6, RPS27, RPL39, RPL18, RPL9, RPL17, RPS26, RPL13A, RPL10, UBA52, RPS7, RPS29, RPS3, …
REACTOME_NONSENSE_MEDIATED_DECAY_NMD	0.000475159	0.0468032	0.498493	1.7262	UPF2, PPP2CA, RPL34, RPL24, ETF1, RPL14, RPS8, RPS25, RPS6, RPS20, RPL36A, RPS27A, RPL35A, RPL19, RPS13, RPL38, RPL35, FAU, RPS9, RPL32, RPLP1, RPS23, RPS21, RPL37, RPS14, RPS24, RPS3A, RPS15A, RPL30, RPL29, RPL5, RPL10A, RPS4X, RPS10, RPL27A, RPS18, RPL27, RPL21, RPS12, RBM8A, RPL11, RPL36, RPL18A, RPL36AL, RPL26, RPL31, RPL7, RPL13, RPL37A, RPL6, RPS27, RPL39, RPL18, RPL9, RPL17, RPS26, RPL13A,…

## Sheet: EDTA separatorT0vsT16
pathway	pval	padj	log2err	NES	leadingEdge
KEGG_CYTOKINE_CYTOKINE_RECEPTOR_INTERACTION	4.87257e-07	9.66288e-05	0.659444	2.13624	CXCL8, CSF3R, TNFRSF1B, IFNGR1, TNFRSF10C, CXCR2, CXCR4, IL4R, CXCR1, IFNAR1, IL6ST, IL7R, IL2RG, TGFB1
REACTOME_GPCR_LIGAND_BINDING	4.95532e-07	9.66288e-05	0.659444	2.0996	CXCL8, C5AR1, CXCR2, FPR1, ADGRE5, CXCR4, PSAP, ECE1, CXCR1
REACTOME_EUKARYOTIC_TRANSLATION_ELONGATION	5.35364e-06	0.00052198	0.610527	-2.08176	RPS17, RPS24, RPSA, RPL28, EEF2, RPS21, RPLP2, RPL9, RPL23A, RPLP0, RPS28, RPS11, EEF1B2, RPS3, RPL27A, RPL13, RPL11, UBA52, RPS5, RPL8, RPS26, RPL22, RPS7, RPL17, RPL7A, RPS23, EEF1G, RPL37A, RPS19, RPS15, RPL18, RPL10, RPS18, RPS29, RPL23, RPL32, RPL13A, RPL12, RPS27A, RPL15, RPL36, RPL3, RPL27, RPS20, RPS2, RPL36A, RPS14, RPL41, RPL26, RPS9
REACTOME_RRNA_PROCESSING	4.61521e-06	0.00052198	0.610527	-2.11533	RPS17, DDX21, NOP10, RPS24, RPSA, RPL28, RPS21, RPLP2, RPL9, RPL23A, RPLP0, RPS28, RPS11, RPS3, RPL27A, RPL13, RPL11, UBA52, RPS5, RPL8, RPS26, NCL, RPL22, RPS7, RPL17, RPL7A, RPS23, RPL37A, RPS19, RPS15, RPL18, RPL10, RPS18, RPS29, RPL23, RPL32, RPL13A, RPL12, RPS27A, RPL15, RPL36, RPL3, RPL27, RPS20, RPS2, RPL36A, RIOK3, RPS14, RPL41, RPL26, RPS9
REACTOME_NEUTROPHIL_DEGRANULATION	7.78901e-06	0.000607543	0.593325	1.65261	C5AR1, SERPINA1, TNFRSF1B, CXCR2, FPR1, ANPEP, LAMP2, IGF2R, ADGRE5, MGAM, SLC44A2, SLC2A3, FCGR2A, FGL2, FCN1, MANBA, SELL, HLA-C, HLA-B, PSAP, RNASET2, ITGB2, YPEL5, HLA-A, S100A9, ITGAX, CTSS, CXCR1, ASAH1, DYNC1LI1, S100A8, FCGR3B, TYROBP, NFKB1, MNDA, CD44, B2M, GMFG, CD53, S100A11, CD68, ARHGAP9, CD63, PYGL, IQGAP2, SDCBP, PTPRC, VAPA, CYBA, RAP1A, LYZ
REACTOME_SELENOAMINO_ACID_METABOLISM	1.23236e-05	0.000801035	0.593325	-2.00341	EPRS1, KARS1, RPS17, RARS1, RPS24, RPSA, RPL28, RPS21, RPLP2, RPL9, RPL23A, RPLP0, RPS28, RPS11, RPS3, RPL27A, RPL13, RPL11, DARS1, UBA52, RPS5, RPL8, RPS26, RPL22, RPS7, RPL17, QARS1, RPL7A, RPS23, RPL37A, RPS19, RPS15, RPL18, SARS1, RPL10, RPS18, RPS29, RPL23, RPL32, RPL13A, RPL12, RPS27A, RPL15, RPL36, RPL3, RPL27, RPS20, RPS2, RPL36A, RPS14, RPL41, RPL26, RPS9
REACTOME_RESPONSE_OF_EIF2AK4_GCN2_TO_AMINO_ACID_DEFICIENCY	1.92283e-05	0.00107129	0.57561	-1.95016	EIF2S2, RPS17, RPS24, RPSA, RPL28, RPS21, RPLP2, RPL9, RPL23A, RPLP0, RPS28, RPS11, RPS3, RPL27A, RPL13, RPL11, UBA52, EIF2S3, RPS5, RPL8, RPS26, RPL22, RPS7, RPL17, RPL7A, RPS23, RPL37A, RPS19, RPS15, RPL18, RPL10, RPS18, RPS29, RPL23, RPL32, RPL13A, RPL12, RPS27A, RPL15, RPL36, RPL3, RPL27, RPS20, RPS2, RPL36A, RPS14, RPL41, RPL26, RPS9
REACTOME_REGULATION_OF_EXPRESSION_OF_SLITS_AND_ROBOS	2.71086e-05	0.00132155	0.57561	-1.87603	PSMD8, PSME2, PSMB4, RBX1, PSMA7, RPS17, UBB, EIF4G1, GSPT1, RPS24, RPSA, RPL28, RPS21, RPLP2, RPL9, PSMB8, RPL23A, RPLP0, PSMF1, RPS28, RPS11, RPS3, RPL27A, RPL13, RPL11, PABPC1, UBA52, RPS5, PSMA4, PSMB3, RPL8, RPS26, RPL22, RPS7, RPL17, RPL7A, RPS23, RPL37A, RPS19, PSMD2, RPS15, RPL18, RPL10, RPS18, RPS29, RPL23, CASC3, RPL32, RPL13A, RPL12, RPS27A, RPL15, RPL36, RPL3, PSMA2, RPL27, RPS20, RPS…
KEGG_RIBOSOME	4.47576e-05	0.00181609	0.557332	-1.90613	RPS17, RPS24, RPSA, RPL28, RPS21, RPLP2, RPL9, RPL23A, RPLP0, RPS28, RPS11, RPS3, RPL27A, RPL13, RPL11, UBA52, RPS5, RPL8, RPS26, RPL22, RPS7, RPL17, RPL7A, RPS23, RPL37A, RPS19, RPS15, RPL18, RPL10, RPS18, RPS29, RPL23, RPL32, RPL13A, RPL12, RPS27A, RPL15, RPL36, RPL3, RPL27, RPS20, RPS2, RPL36A, RPL41, RPL26, RPS9
REACTOME_EUKARYOTIC_TRANSLATION_INITIATION	4.8038e-05	0.00181609	0.557332	-1.91986	EIF3M, EIF5B, EIF2S2, RPS17, EIF4G1, RPS24, RPSA, RPL28, RPS21, RPLP2, EIF4A1, RPL9, RPL23A, RPLP0, RPS28, RPS11, EIF3F, EIF5, RPS3, RPL27A, RPL13, RPL11, PABPC1, UBA52, EIF2S3, RPS5, RPL8, RPS26, RPL22, RPS7, RPL17, EIF3H, RPL7A, EIF4H, RPS23, RPL37A, RPS19, RPS15, RPL18, RPL10, RPS18, RPS29, RPL23, RPL32, RPL13A, RPL12, RPS27A, RPL15, RPL36, RPL3, RPL27, RPS20, EIF3D, RPS2, RPL36A, RPS14, RPL41…
REACTOME_INTERLEUKIN_4_AND_INTERLEUKIN_13_SIGNALING	5.1223e-05	0.00181609	0.557332	1.90963	FOS, CXCL8, TNFRSF1B, JUNB, IL4R, ITGB2, BCL6, ITGAX, HSP90B1, IL2RG, TGFB1, HIF1A, AKT1
REACTOME_TRANSLATION	7.47681e-05	0.00242996	0.538434	-1.61829	WARS1, EPRS1, OXA1L, EIF3M, EIF5B, EIF2S2, KARS1, RPS17, RARS1, EIF4G1, GARS1, GSPT1, RPS24, RPSA, RPL28, EEF2, RPS21, RPLP2, EIF4A1, RPL9, RPL23A, RPLP0, RPS28, RPS11, EIF3F, EEF1B2, EIF5, RPS3, RPL27A, RPL13, RPL11, PABPC1, DARS1, UBA52, EIF2S3, RPS5, RPL8, RPS26, RPL22, RPS7, RPL17, QARS1, EIF3H, RPL7A, EIF4H, RPS23, EEF1G, RPL37A, SRP14, RPS19, RPS15, RPL18, SARS1, RPL10, RPS18, RPS29, RPL23,…
REACTOME_INNATE_IMMUNE_SYSTEM	0.000114613	0.00343838	0.538434	1.4472	TNFAIP3, FOS, TREM1, C5AR1, SERPINA1, TNFRSF1B, NFKBIA, CXCR2, FPR1, ANPEP, LAMP2, IGF2R, CD46, ADGRE5, MGAM, SLC44A2, SLC2A3, FCGR2A, FGL2, FCN1, RELA, MANBA, SELL, HLA-C, HLA-B, GAB2, PSAP, RNASET2, ITGB2, YPEL5, HLA-A, PELI1, MYO5A, S100A9, ITGAX, CTSS, CXCR1, ASAH1, HSP90B1, DYNC1LI1, NCF4, ICAM3, HLA-E, S100A8, FCGR3B, TYROBP, LYN, NFKB1, CNPY3, MNDA, CD44, B2M, PPP3CB, ITPR2, GMFG, CD53, AT…
KEGG_NATURAL_KILLER_CELL_MEDIATED_CYTOTOXICITY	0.000154382	0.00408075	0.518848	1.85579	IFNGR1, TNFRSF10C, HLA-C, HLA-B, ITGB2, HLA-A, IFNAR1, HLA-E, FCGR3B, PIK3R5, TYROBP, SOS2, PPP3CB, FCGR3A
REACTOME_IMMUNOREGULATORY_INTERACTIONS_BETWEEN_A_LYMPHOID_AND_A_NON_LYMPHOID_CELL	0.000156952	0.00408075	0.518848	1.91639	TREM1, PILRA, SELL, HLA-C, HLA-B, ITGB2, HLA-A, LILRA2, IFITM1, ICAM3, HLA-E, TYROBP, HLA-F, B2M, FCGR3A
REACTOME_NONSENSE_MEDIATED_DECAY_NMD	0.000184215	0.00449023	0.518848	-1.86968	PPP2R1A, RPS17, EIF4G1, SMG1, GSPT1, RPS24, RPSA, RPL28, RPS21, RPLP2, RPL9, RPL23A, RPLP0, RPS28, RPS11, RPS3, RPL27A, RPL13, RPL11, PABPC1, UBA52, RPS5, RPL8, RPS26, RPL22, RPS7, RPL17, RPL7A, RPS23, RPL37A, RPS19, RPS15, RPL18, RPL10, RPS18, RPS29, RPL23, CASC3, RPL32, RPL13A, RPL12, RPS27A, RPL15, RPL36, RPL3, RPL27, RPS20, RPS2, RPL36A, RPS14, RBM8A, RPL41, RPL26, RPS9
REACTOME_CELLULAR_RESPONSE_TO_CHEMICAL_STRESS	0.000295453	0.00677804	0.498493	-1.78008	ALB, CAT, PSMD8, PSME2, HBA1, PRDX1, PSMB4, NDUFA4, RBX1, HBA2, CSNK2B, GSTP1, PSMA7, UBB, PRDX5, NCOA2, PRDX6, HBB, COX7C, COX6B1
REACTOME_SRP_DEPENDENT_COTRANSLATIONAL_PROTEIN_TARGETING_TO_MEMBRANE	0.000526808	0.0114142	0.477271	-1.7332	RPS17, RPS24, RPSA, RPL28, RPS21, RPLP2, RPL9, RPL23A, RPLP0, RPS28, RPS11, RPS3, RPL27A, RPL13, RPL11, UBA52, RPS5, RPL8, RPS26, RPL22, RPS7, RPL17, RPL7A, RPS23, RPL37A, SRP14, RPS19, RPS15, RPL18, RPL10, RPS18, RPS29, RPL23, RPL32, RPL13A, RPL12, RPS27A, RPL15, RPL36, RPL3, SRP9, RPL27, RPS20, RPS2, RPL36A, RPS14, RPL41, RPL26, RPS9
REACTOME_CELLULAR_RESPONSE_TO_STARVATION	0.000638387	0.0131037	0.477271	-1.70902	EIF2S2, RPS17, ATP6V1B2, RPS24, RPSA, RPL28, RPS21, RPLP2, ATP6V0C, RPL9, RPL23A, RPLP0, RPS28, RPS11, RPS3, RPL27A, RPL13, RPL11, UBA52, EIF2S3, RPS5, RPL8, RPS26, RPL22, RPS7, RPL17, RPL7A, RPS23, RPL37A, RPS19, RPS15, RPL18, RPL10, RPS18, RPS29, RPL23, RPL32, RPL13A, RPL12, RPS27A, RPL15, RPL36, RPL3, RPL27, RPS20, RPS2, RPL36A, RPS14, RPL41, RPL26, RPS9
REACTOME_CYTOKINE_SIGNALING_IN_IMMUNE_SYSTEM	0.00106379	0.0207439	0.45506	1.45817	FOS, CXCL8, CSF3R, TNFRSF1B, IFNGR1, NFKBIA, JUNB, FPR1, IL4R, RELA, HLA-C, HLA-B, GAB2, ITGB2, HLA-A, PELI1, BCL6, ITGAX, CDKN1B, IFITM2, HSP90B1, IFNAR1, IL6ST, IL7R, IFITM1, HLA-E, IL2RG, LYN, NFKB1, CANX, SOS2, HLA-F, TGFB1, CD44, B2M, HIF1A, AKT1
REACTOME_CYTOPROTECTION_BY_HMOX1	0.00146791	0.0272613	0.45506	-1.81441	ALB, PSMD8, PSME2, HBA1, PSMB4, NDUFA4, RBX1, HBA2, CSNK2B, PSMA7, UBB, NCOA2, HBB, COX7C, COX6B1, PSMB8, PSMF1, COX6A1, UBA52, PSMA4, PSMB3
REACTOME_SIGNALING_BY_GPCR	0.00173854	0.0308196	0.45506	1.63263	CXCL8, C5AR1, CXCR2, FPR1, ADGRE5, CXCR4, PSAP, ECE1, PDE4B, CXCR1, RGS2, PIK3R5, ARRB2, SOS2, RGS18, AKAP13, PPP3CB, ITPR2, AKT1, RGS10, RASGRP1, GRK6, ARHGEF1, FGD4, RHOA, PREX1, CALM1, GNB2
REACTOME_G_ALPHA_I_SIGNALLING_EVENTS	0.00188963	0.0320416	0.45506	1.74386	CXCL8, C5AR1, CXCR2, FPR1, CXCR4, PSAP, PDE4B, CXCR1, RGS18, PPP3CB, ITPR2
BIOCARTA_PPARA_PATHWAY	0.00210623	0.0342262	0.431708	1.75949	NFKBIA, DUSP1, RELA
KEGG_TOLL_LIKE_RECEPTOR_SIGNALING_PATHWAY	0.0031454	0.0490682	0.431708	1.73833	FOS, CXCL8, NFKBIA, RELA, IFNAR1, PIK3R5, NFKB1, AKT1

## Sheet: ACD-AT0vsT4
pathway	pval	padj	log2err	NES	leadingEdge
REACTOME_EUKARYOTIC_TRANSLATION_ELONGATION	9.42888e-12	1.92821e-09	0.875325	2.57034	RPL24, RPL36AL, RPS10, RPL35, RPL39, RPL15, RPL35A, RPS14, EEF1B2, RPS7, RPL8, RPL7, RPS26, RPS20, RPL38, RPL27A, RPS13, RPS6, FAU, RPL28, EEF1D, RPLP0, RPL11, RPS27A, RPL19, RPL9, RPL37A, RPS4X, RPS3A, RPS12, RPL13A, RPL5, RPLP1, RPL36, RPL26, RPS17, RPL32, RPL14, RPL30, RPL23, RPS21, RPS8, RPS23, RPS18, RPL31, RPL37, RPL6, EEF1A1, RPS27, RPS28, RPL27, RPS16, RPL36A, RPL29, RPS15A, RPL18, RPSA, …
REACTOME_SRP_DEPENDENT_COTRANSLATIONAL_PROTEIN_TARGETING_TO_MEMBRANE	6.20192e-12	1.92821e-09	0.887075	2.58595	SSR2, SSR4, RPL24, RPL36AL, RPS10, RPL35, RPL39, RPL15, RPL35A, SRP72, RPS14, RPS7, RPL8, RPL7, RPS26, RPS20, RPL38, RPL27A, RPS13, RPS6, FAU, RPL28, RPLP0, RPL11, RPS27A, RPL19, RPL9, RPL37A, RPS4X, RPS3A, RPS12, RPL13A, RPL5, RPLP1, RPL36, RPL26, RPS17, RPL32, RPL14, RPL30, RPL23, RPS21, RPS8, RPS23, RPS18, RPL31, RPL37, RPL6, RPS27, RPS28, RPL27, RPS16, RPL36A, RPL29, RPS15A, RPL18, RPSA, RPL2…
KEGG_RIBOSOME	5.0696e-11	6.91156e-09	0.851339	2.53147	RPL24, RPL36AL, RPS10, RPL35, RPL39, RPL15, RPL35A, RPS7, RPL8, RPL7, RPS26, RPS20, RPL38, RPL27A, RPS13, RPS6, FAU, RPL28, RPLP0, RPL11, RPS27A, RPL19, RPL9, RPL37A, RPS4X, RPS3A, RPS12, RPL13A, RPL5, RPLP1, RPL36, RPL26, RPS17, RPL32, RPL14, RPL30, RPL23, RPS21, RPS8, RPS23, RPS18, RPL31, RPL37, RPL6, RPS27, RPS28, RPL27, RPS16, RPL36A, RPL29, RPS15A, RPL18, RPSA, RPL22, RPL4, RPLP2, RPL10, RPL…
REACTOME_RESPONSE_OF_EIF2AK4_GCN2_TO_AMINO_ACID_DEFICIENCY	9.95598e-11	1.018e-08	0.839089	2.4936	RPL24, RPL36AL, RPS10, RPL35, RPL39, RPL15, RPL35A, RPS14, RPS7, RPL8, RPL7, RPS26, RPS20, RPL38, RPL27A, RPS13, RPS6, FAU, RPL28, RPLP0, RPL11, RPS27A, RPL19, EIF2S2, RPL9, ATF4, RPL37A, RPS4X, RPS3A, RPS12, RPL13A, RPL5, RPLP1, RPL36, RPL26, RPS17, RPL32, RPL14, RPL30, RPL23, RPS21, RPS8, RPS23, RPS18, RPL31, RPL37, RPL6, RPS27, RPS28, RPL27, RPS16, RPL36A, RPL29, RPS15A, RPL18, RPSA, RPL22, RP…
REACTOME_EUKARYOTIC_TRANSLATION_INITIATION	2.93205e-10	2.39842e-08	0.814036	2.3745	EIF3C, EIF5B, RPL24, RPL36AL, RPS10, RPL35, RPL39, RPL15, RPL35A, RPS14, RPS7, EIF3M, RPL8, EIF3K, RPL7, RPS26, RPS20, RPL38, RPL27A, RPS13, RPS6, FAU, RPL28, RPLP0, RPL11, RPS27A, RPL19, EIF2S2, RPL9, RPL37A, RPS4X, EIF4G1, RPS3A, RPS12, RPL13A, RPL5, RPLP1, EIF3B, RPL36, RPL26, RPS17, RPL32, RPL14, RPL30, RPL23, RPS21, RPS8, EIF4A2, RPS23, RPS18, RPL31, RPL37, RPL6, EIF3F, RPS27, RPS28, RPL27, …
REACTOME_CELLULAR_RESPONSE_TO_STARVATION	3.62226e-10	2.46917e-08	0.814036	2.43397	RPL24, RPL36AL, RPS10, RPL35, RPL39, RPL15, RPL35A, RPS14, RPS7, RPL8, RPL7, RPS26, RPS20, RPL38, RPL27A, RPS13, RPS6, FAU, RPL28, RPLP0, RPL11, RPS27A, RPL19, EIF2S2, RPL9, ATF4, RPL37A, RPS4X, RPS3A, RPS12, RPL13A, RPL5, RPLP1, RPL36, RPL26, RPS17, RPL32, RPL14, RPL30, RPL23, RPS21, RPS8, RPS23, RPS18, RPL31, RPL37, RPL6, RPS27, RPS28, RPL27, RPS16, RPL36A, RPL29, RPS15A, RPL18, RPSA, RPL22, RP…
REACTOME_RRNA_PROCESSING	1.26584e-09	7.39612e-08	0.788187	2.38927	RPL24, RPL36AL, RPS10, RPL35, RPL39, RPL15, RPL35A, RPS14, RPS7, RPL8, RPL7, RPS26, RPS20, RPL38, RPL27A, FBL, RPS13, RPS6, MTREX, FAU, RPL28, RPLP0, RPL11, RPS27A, RPL19, RPL9, RPL37A, RPS4X, RPS3A, RPS12, RPL13A, RPL5, RPLP1, RPL36, RPL26, RPS17, RPL32, RPL14, RPL30, RPL23, RPS21, RPS8, RPS23, RPS18, RPL31, RPL37, RPL6, DDX21, RPS27, NOP10, RPS28, RPL27, RPS16, RPL36A, RPL29, RPS15A, RPL18, RPS…
REACTOME_SELENOAMINO_ACID_METABOLISM	2.77961e-09	1.42108e-07	0.774939	2.38182	RPL24, RPL36AL, RPS10, RPL35, RPL39, RPL15, RPL35A, RPS14, RPS7, RPL8, RPL7, RARS1, RPS26, RPS20, RPL38, RPL27A, RPS13, RPS6, FAU, RPL28, RPLP0, RPL11, RPS27A, RPL19, RPL9, RPL37A, RPS4X, RPS3A, RPS12, RPL13A, RPL5, RPLP1, RPL36, KARS1, RPL26, RPS17, RPL32, RPL14, RPL30, RPL23, RPS21, RPS8, RPS23, RPS18, RPL31, RPL37, RPL6, RPS27, RPS28, RPL27, RPS16, RPL36A, RPL29, RPS15A, RPL18, RPSA, RPL22, RP…
REACTOME_TRANSLATION	7.47134e-09	3.39531e-07	0.74774	2.22166	SSR2, SSR4, EIF3C, EIF5B, RPL24, RPL36AL, RPS10, RPL35, RPL39, RPL15, RPL35A, SRP72, RPS14, EEF1B2, RPS7, EIF3M, RPL8, EIF3K, RPL7, RARS1, RPS26, RPS20, RPL38, RPL27A, RPS13, RPS6, FAU, RPL28, EEF1D, RPLP0, RPL11, RPS27A, RPL19, EIF2S2, RPL9, RPL37A, RPS4X, EIF4G1, RPS3A, RPS12, RPL13A, RPL5, RPLP1, EIF3B, RPL36, KARS1, RPL26, RPS17, RPL32, RPL14, RPL30, RPL23, RPS21, RPS8, EIF4A2, RPS23, RPS18, …
REACTOME_NONSENSE_MEDIATED_DECAY_NMD	1.03035e-07	4.21415e-06	0.704976	2.22338	PPP2R1A, RNPS1, RPL24, RPL36AL, RPS10, RPL35, RPL39, RPL15, RPL35A, RPS14, RPS7, RPL8, RPL7, RPS26, RPS20, RPL38, RPL27A, RPS13, RPS6, FAU, RPL28, RPLP0, RPL11, RPS27A, RPL19, RPL9, RPL37A, RPS4X, EIF4G1, RPS3A, RPS12, RPL13A, RPL5, RPLP1, RPL36, RPL26, RPS17, RPL32, RPL14, RPL30, RPL23, RPS21, RPS8, RPS23, RPS18, RPL31, RPL37, RPL6, RPS27, RPS28, RPL27, RPS16, RPL36A, RPL29, RPS15A, RPL18, RPSA,…
REACTOME_INFLUENZA_INFECTION	6.19594e-07	2.30376e-05	0.659444	2.09998	RPL24, RPL36AL, RPS10, RPL35, CANX, RPL39, RPL15, NUP214, RPL35A, RPS14, RPS7, RPL8, NUP98, RPL7, RPS26, RPS20, RPL38, RPL27A, RPS13, RPS6, FAU, RPL28, RPLP0, RPL11, RPS27A, RPL19, POM121, RPL9, RPL37A, RPS4X, RPS3A, RPS12, RPL13A, RPL5, RPLP1, RPL36, RPL26, RPS17, RPL32, RPL14, RPL30, KPNB1, RPL23, RPS21, RPS8, RPS23, RPS18, RPL31, RPL37, RPL6, RAN, RPS27, RPS28, RPL27, RPS16, RPL36A, RPL29, RPS…
REACTOME_REGULATION_OF_EXPRESSION_OF_SLITS_AND_ROBOS	2.10262e-05	0.000716643	0.57561	1.91935	RNPS1, RPL24, RPL36AL, RPS10, PSME1, RPL35, RPL39, RPL15, RPL35A, UBC, RPS14, PSMD4, RPS7, RPL8, RPL7, RPS26, RPS20, RPL38, RPL27A, UBB, PSMB9, RPS13, RPS6, FAU, RPL28, RPLP0, RPL11, RPS27A, RPL19, RPL9, RPL37A, RPS4X, EIF4G1, RPS3A, RPS12, RPL13A, RPL5, RPLP1, RPL36, RPL26, RPS17, RPL32, RPL14, RPL30, RPL23, RPS21, RPS8, RPS23, RPS18, RPL31, RPL37, RPL6, RPS27, RPS28, RPL27, RPS16, RPL36A, RPL29…
REACTOME_CELLULAR_RESPONSES_TO_EXTERNAL_STIMULI	0.000137216	0.00417192	0.518848	1.64409	DNAJB1, H2BC10, H4C2, FOS, TUBB4B, COX7C, ALB, H4C8, STAT3, CUL3, PRDX5, TFDP2, RPL24, H4C4, DNAJA2, RPL36AL, RPS10, BACH1, PSME1, RPL35, RPL39, RPL15, NUP214, RPL35A, UBC, H2AC6, RPS14, TUBA1B, YWHAE, PSMD4, CAT, H2BC12, HSPA9, NFKB1, RPS7, TUBA4A, LRPPRC, CSNK2A1, H2AC8, RPL8, NUP98, TUBA1A, RPL7, RPS26, RPS20, RPL38, RPL27A, H2BC8, UBB, PSMB9, RPS13, ATM, RPS6, H4C14, FAU, RPL28, RPLP0, RPL11,…
REACTOME_SIGNALING_BY_ROBO_RECEPTORS	0.000142804	0.00417192	0.518848	1.81433	RHOA, RNPS1, RPL24, RPL36AL, RPS10, PSME1, RPL35, RPL39, RPL15, RPL35A, UBC, RPS14, CXCR4, PSMD4, RPS7, RPL8, RPL7, RPS26, RPS20, RPL38, RPL27A, UBB, PSMB9, RPS13, RPS6, FAU, RPL28, RPLP0, RPL11, RPS27A, RPL19, RPL9, RPL37A, RPS4X, EIF4G1, RPS3A, RPS12, RPL13A, RPL5, RPLP1, CAP1, RPL36, RPL26, RPS17, RPL32, RPL14, RPL30, RPL23, RPS21, RPS8, RPS23, RPS18, RPL31, RPL37, RPL6, RPS27, RPS28, RPL27, R…
REACTOME_METABOLISM_OF_AMINO_ACIDS_AND_DERIVATIVES	0.000178645	0.00487106	0.518848	1.82005	OGDH, RPL24, RPL36AL, RPS10, PSME1, RPL35, RPL39, RPL15, RPL35A, RPS14, PSMD4, RPS7, RPL8, RPL7, RARS1, RPS26, RPS20, GLS, RPL38, RPL27A, PSMB9, RPS13, RPS6, FAU, RPL28, RPLP0, RPL11, RPS27A, RPL19, RPL9, RPL37A, RPS4X, RPS3A, RPS12, RPL13A, RPL5, RPLP1, RPL36, KARS1, RPL26, RPS17, RPL32, RPL14, RPL30, RPL23, RPS21, RPS8, RPS23, RPS18, RPL31, RPL37, RPL6, RPS27, RPS28, RPL27, RPS16, RPL36A, RPL29…
REACTOME_REGULATION_OF_LIPID_METABOLISM_BY_PPARALPHA	0.000275814	0.00663576	0.498493	-2.09304	ACSL1, EP300, TBL1XR1, CHD9, MED12, CREBBP, MED13, NCOA1, NCOA2, CD36, NCOA3, MED13L
REACTOME_TRANSCRIPTIONAL_REGULATION_OF_WHITE_ADIPOCYTE_DIFFERENTIATION	0.000275814	0.00663576	0.498493	-2.09302	EP300, TBL1XR1, CHD9, MED12, TGFB1, CREBBP, MED13, NCOA1, NCOA2, CD36, NCOA3, MED13L
REACTOME_PROTEIN_FOLDING	0.00035951	0.00816887	0.498493	2.00305	CCT8, TUBB4B, CCT7, ARFGEF2, FBXW7, STAT3, TUBA1B, TUBA4A, FBXL5, CSNK2A1, TUBA1A, CCT3, CCT2
REACTOME_NERVOUS_SYSTEM_DEVELOPMENT	0.00183688	0.0395413	0.45506	1.54913	TUBB4B, RHOA, ABLIM1, RNPS1, RPL24, RPL36AL, DLG1, RPS10, PSME1, RPL35, RPL39, PTPRC, RPL15, RPL35A, UBC, PIK3R1, RPS14, TUBA1B, CXCR4, PSMD4, RPS7, TUBA4A, CSNK2A1, RPL8, ANK1, TUBA1A, RPL7, RPS26, RPS20, RPL38, RPL27A, UBB, PSMB9, RPS13, RPS6, FAU, RPL28, RPLP0, RPL11, RPS27A, RPS6KA3, RPL19, MYL12B, DNM2, RPL9, RPL37A, RPS4X, EIF4G1, EZR, RPS3A, RPS12, RPL13A, RPL5, RPLP1, CAP1, RPL36, CFL1, R…
REACTOME_THE_CITRIC_ACID_TCA_CYCLE_AND_RESPIRATORY_ELECTRON_TRANSPORT	0.00200989	0.0411023	0.431708	1.77524	ATP5PD, COX7C, OGDH, LDHB, ETFA, ATP5PO, UQCRB, NDUFA13, UQCRH, LRPPRC, ATP5F1A, CS, NDUFV1, ATP5F1C, COX6B1, ATP5ME, COX6A1, LDHA

## Sheet: DNA StreckT0vsT72
pathway	pval	padj	log2err	NES	leadingEdge
REACTOME_NERVOUS_SYSTEM_DEVELOPMENT	8.56295e-12	4.36711e-10	0.875325	-2.73173	PSME1, SPTBN1, SPTAN1, RPL24, RPL6, RPL37, RPL22, RPS24, RPS23, RPL36A, RPL23A, RPS3A, RPS25, RPL9, RPL11, HSP90AB1, RPL17, ARPC3, RPL14, RPL37A, RPS10, RPL34, RPS18, RPL30, RPL38, RPS17, RPL23, RPS6, HSPA8, RPS4X, RPL32, RPL35A, RPS3, RPL31, PABPC1, RPL5, RPS7, RPL39, RPL10A, RPL7, CAP1, RPS14, TUBA1B, RPL26, RPS19, RPS8, RPL19, RPL21, RPS9, RPL3, SDCBP, RPS20, RPSA, RPL27A, MYL12A, RPL41, RPL4,…
REACTOME_TRANSLATION	3.57251e-11	9.10989e-10	0.851339	-2.66941	RPL24, RPL6, RPL37, RPL22, RPS24, RPS23, RPL36A, RPL23A, RPS3A, RPS25, RPL9, RPL11, RPL17, EEF1B2, RPL14, RPL37A, RPS10, RPL34, RPS18, RPL30, RPL38, RPS17, RPL23, RPS6, EIF4B, RPS4X, RPL32, RPL35A, RPS3, RPL31, PABPC1, EEF1G, RPL5, RPS7, RPL39, RPL10A, RPL7, RPS14, RPL26, RPS19, RPS8, RPL19, EEF1A1, RPL21, RPS9, RPL3, RPS20, RPSA, RPL27A, RPL41, RPL4, RPS27, RPL35, RPS13, RPL36, RPS28, RPS16, RPS…
REACTOME_DEVELOPMENTAL_BIOLOGY	1.92317e-10	2.7963e-09	0.826657	-2.64691	PSME1, SPTBN1, SPTAN1, RPL24, RPL6, RPL37, RPL22, RPS24, RPS23, RPL36A, RPL23A, RPS3A, RPS25, RPL9, RPL11, HSP90AB1, RPL17, ARPC3, RPL14, MED13L, RPL37A, RPS10, RPL34, RPS18, RPL30, RPL38, RPS17, RPL23, RPS6, HSPA8, RPS4X, RPL32, RPL35A, RPS3, RPL31, PABPC1, RPL5, RPS7, RPL39, RPL10A, RPL7, CAP1, RPS14, TUBA1B, RPL26, RPS19, RPS8, RPL19, RPL21, RPS9, RPL3, SDCBP, RPS20, RPSA, RPL27A, H2BC12, MYL1…
REACTOME_EUKARYOTIC_TRANSLATION_ELONGATION	2.32304e-10	2.7963e-09	0.826657	-2.61335	RPL24, RPL6, RPL37, RPL22, RPS24, RPS23, RPL36A, RPL23A, RPS3A, RPS25, RPL9, RPL11, RPL17, EEF1B2, RPL14, RPL37A, RPS10, RPL34, RPS18, RPL30, RPL38, RPS17, RPL23, RPS6, RPS4X, RPL32, RPL35A, RPS3, RPL31, EEF1G, RPL5, RPS7, RPL39, RPL10A, RPL7, RPS14, RPL26, RPS19, RPS8, RPL19, EEF1A1, RPL21, RPS9, RPL3, RPS20, RPSA, RPL27A, RPL41, RPL4, RPS27, RPL35, RPS13, RPL36, RPS28, RPS16, RPS15A, RPS27A
REACTOME_METABOLISM_OF_RNA	2.74147e-10	2.7963e-09	0.814036	-2.61996	PSME1, RPL24, HNRNPA1, RPL6, RPL37, RPL22, RPS24, RPS23, RPL36A, RPL23A, RPS3A, RPS25, RPL9, RPL11, RPL17, RPL14, RPL37A, RPS10, HNRNPU, RPL34, RPS18, RPL30, RPL38, RPS17, RPL23, RPS6, HSPA8, EIF4B, RPS4X, RPL32, RPL35A, RPS3, RPL31, PABPC1, RPL5, RPS7, RPL39, RPL10A, RPL7, HNRNPK, RPS14, RPL26, RPS19, RPS8, RPL19, RPL21, RPS9, RPL3, RPS20, RPSA, RPL27A, RPL41, RPL4, RPS27, UBC, RPL35, RPS13, RPL…
REACTOME_REGULATION_OF_EXPRESSION_OF_SLITS_AND_ROBOS	4.85704e-10	4.12848e-09	0.801216	-2.58385	PSME1, RPL24, RPL6, RPL37, RPL22, RPS24, RPS23, RPL36A, RPL23A, RPS3A, RPS25, RPL9, RPL11, RPL17, RPL14, RPL37A, RPS10, RPL34, RPS18, RPL30, RPL38, RPS17, RPL23, RPS6, RPS4X, RPL32, RPL35A, RPS3, RPL31, PABPC1, RPL5, RPS7, RPL39, RPL10A, RPL7, RPS14, RPL26, RPS19, RPS8, RPL19, RPL21, RPS9, RPL3, RPS20, RPSA, RPL27A, RPL41, RPL4, RPS27, UBC, RPL35, RPS13, RPL36, RPS28, RPS16, RPS15A, RPS27A
REACTOME_NONSENSE_MEDIATED_DECAY_NMD	7.63286e-10	4.86595e-09	0.801216	-2.54552	RPL24, RPL6, RPL37, RPL22, RPS24, RPS23, RPL36A, RPL23A, RPS3A, RPS25, RPL9, RPL11, RPL17, RPL14, RPL37A, RPS10, RPL34, RPS18, RPL30, RPL38, RPS17, RPL23, RPS6, RPS4X, RPL32, RPL35A, RPS3, RPL31, PABPC1, RPL5, RPS7, RPL39, RPL10A, RPL7, RPS14, RPL26, RPS19, RPS8, RPL19, RPL21, RPS9, RPL3, RPS20, RPSA, RPL27A, RPL41, RPL4, RPS27, RPL35, RPS13, RPL36, RPS28, RPS16, RPS15A, RPS27A
REACTOME_SIGNALING_BY_ROBO_RECEPTORS	7.62072e-10	4.86595e-09	0.801216	-2.59496	PSME1, RPL24, RPL6, RPL37, RPL22, RPS24, RPS23, RPL36A, RPL23A, RPS3A, RPS25, RPL9, RPL11, RPL17, RPL14, RPL37A, RPS10, RPL34, RPS18, RPL30, RPL38, RPS17, RPL23, RPS6, RPS4X, RPL32, RPL35A, RPS3, RPL31, PABPC1, RPL5, RPS7, RPL39, RPL10A, RPL7, CAP1, RPS14, RPL26, RPS19, RPS8, RPL19, RPL21, RPS9, RPL3, RPS20, RPSA, RPL27A, RPL41, RPL4, RPS27, UBC, RPL35, RPS13, RPL36, RPS28, RPS16, RPS15A, RPS27A
REACTOME_EUKARYOTIC_TRANSLATION_INITIATION	9.37596e-10	5.31305e-09	0.788187	-2.56527	RPL24, RPL6, RPL37, RPL22, RPS24, RPS23, RPL36A, RPL23A, RPS3A, RPS25, RPL9, RPL11, RPL17, RPL14, RPL37A, RPS10, RPL34, RPS18, RPL30, RPL38, RPS17, RPL23, RPS6, EIF4B, RPS4X, RPL32, RPL35A, RPS3, RPL31, PABPC1, RPL5, RPS7, RPL39, RPL10A, RPL7, RPS14, RPL26, RPS19, RPS8, RPL19, RPL21, RPS9, RPL3, RPS20, RPSA, RPL27A, RPL41, RPL4, RPS27, RPL35, RPS13, RPL36, RPS28, RPS16, RPS15A, RPS27A
KEGG_RIBOSOME	1.72597e-09	8.80245e-09	0.788187	-2.48707	RPL24, RPL6, RPL37, RPL22, RPS24, RPS23, RPL36A, RPL23A, RPS3A, RPS25, RPL9, RPL11, RPL17, RPL14, RPL37A, RPS10, RPL34, RPS18, RPL30, RPL38, RPS17, RPL23, RPS6, RPS4X, RPL32, RPL35A, RPS3, RPL31, RPL5, RPS7, RPL39, RPL10A, RPL7, RPL26, RPS19, RPS8, RPL19, RPL21, RPS9, RPL3, RPS20, RPSA, RPL27A, RPL41, RPL4, RPS27, RPL35, RPS13, RPL36, RPS28, RPS16, RPS15A, RPS27A
REACTOME_METABOLISM_OF_AMINO_ACIDS_AND_DERIVATIVES	2.35868e-09	1.09357e-08	0.774939	-2.52197	PSME1, RPL24, RPL6, RPL37, RPL22, RPS24, RPS23, RPL36A, RPL23A, RPS3A, RPS25, RPL9, RPL11, RPL17, RPL14, RPL37A, RPS10, RPL34, RPS18, RPL30, RPL38, RPS17, RPL23, RPS6, RPS4X, RPL32, RPL35A, RPS3, RPL31, RPL5, RPS7, RPL39, RPL10A, RPL7, RPS14, RPL26, RPS19, RPS8, RPL19, RPL21, RPS9, RPL3, RPS20, RPSA, RPL27A, RPL41, RPL4, RPS27, RPL35, RPS13, RPL36, RPS28, RPS16, RPS15A, RPS27A
REACTOME_CELLULAR_RESPONSE_TO_STARVATION	7.2215e-09	2.16645e-08	0.761461	-2.51127	RPL24, RPL6, RPL37, RPL22, RPS24, RPS23, RPL36A, RPL23A, RPS3A, RPS25, RPL9, RPL11, RPL17, RPL14, RPL37A, RPS10, RPL34, RPS18, RPL30, RPL38, RPS17, RPL23, RPS6, RPS4X, RPL32, RPL35A, RPS3, RPL31, RPL5, RPS7, RPL39, RPL10A, RPL7, RPS14, RPL26, RPS19, RPS8, RPL19, RPL21, RPS9, RPL3, RPS20, RPSA, RPL27A, RPL41, RPL4, RPS27, RPL35, RPS13, RPL36, RPS28, RPS16, RPS15A, RPS27A
REACTOME_INFLUENZA_INFECTION	5.13203e-09	2.16645e-08	0.761461	-2.50302	RPL24, RPL6, RPL37, RPL22, RPS24, RPS23, RPL36A, RPL23A, RPS3A, RPS25, RPL9, RPL11, RPL17, RPL14, RPL37A, RPS10, RPL34, RPS18, RPL30, RPL38, RPS17, RPL23, RPS6, RPS4X, RPL32, RPL35A, RPS3, RPL31, RPL5, RPS7, RPL39, RPL10A, RPL7, RPS14, RPL26, RPS19, RPS8, RPL19, RPL21, RPS9, RPL3, RPS20, RPSA, RPL27A, RPL41, RPL4, RPS27, RPL35, RPS13, RPL36, RPS28, RPS16, RPS15A, RPS27A
REACTOME_RESPONSE_OF_EIF2AK4_GCN2_TO_AMINO_ACID_DEFICIENCY	7.2215e-09	2.16645e-08	0.761461	-2.51127	RPL24, RPL6, RPL37, RPL22, RPS24, RPS23, RPL36A, RPL23A, RPS3A, RPS25, RPL9, RPL11, RPL17, RPL14, RPL37A, RPS10, RPL34, RPS18, RPL30, RPL38, RPS17, RPL23, RPS6, RPS4X, RPL32, RPL35A, RPS3, RPL31, RPL5, RPS7, RPL39, RPL10A, RPL7, RPS14, RPL26, RPS19, RPS8, RPL19, RPL21, RPS9, RPL3, RPS20, RPSA, RPL27A, RPL41, RPL4, RPS27, RPL35, RPS13, RPL36, RPS28, RPS16, RPS15A, RPS27A
REACTOME_RRNA_PROCESSING	7.2215e-09	2.16645e-08	0.761461	-2.51127	RPL24, RPL6, RPL37, RPL22, RPS24, RPS23, RPL36A, RPL23A, RPS3A, RPS25, RPL9, RPL11, RPL17, RPL14, RPL37A, RPS10, RPL34, RPS18, RPL30, RPL38, RPS17, RPL23, RPS6, RPS4X, RPL32, RPL35A, RPS3, RPL31, RPL5, RPS7, RPL39, RPL10A, RPL7, RPS14, RPL26, RPS19, RPS8, RPL19, RPL21, RPS9, RPL3, RPS20, RPSA, RPL27A, RPL41, RPL4, RPS27, RPL35, RPS13, RPL36, RPS28, RPS16, RPS15A, RPS27A
REACTOME_SELENOAMINO_ACID_METABOLISM	7.2215e-09	2.16645e-08	0.761461	-2.51127	RPL24, RPL6, RPL37, RPL22, RPS24, RPS23, RPL36A, RPL23A, RPS3A, RPS25, RPL9, RPL11, RPL17, RPL14, RPL37A, RPS10, RPL34, RPS18, RPL30, RPL38, RPS17, RPL23, RPS6, RPS4X, RPL32, RPL35A, RPS3, RPL31, RPL5, RPS7, RPL39, RPL10A, RPL7, RPS14, RPL26, RPS19, RPS8, RPL19, RPL21, RPS9, RPL3, RPS20, RPSA, RPL27A, RPL41, RPL4, RPS27, RPL35, RPS13, RPL36, RPS28, RPS16, RPS15A, RPS27A
REACTOME_SRP_DEPENDENT_COTRANSLATIONAL_PROTEIN_TARGETING_TO_MEMBRANE	7.2215e-09	2.16645e-08	0.761461	-2.51127	RPL24, RPL6, RPL37, RPL22, RPS24, RPS23, RPL36A, RPL23A, RPS3A, RPS25, RPL9, RPL11, RPL17, RPL14, RPL37A, RPS10, RPL34, RPS18, RPL30, RPL38, RPS17, RPL23, RPS6, RPS4X, RPL32, RPL35A, RPS3, RPL31, RPL5, RPS7, RPL39, RPL10A, RPL7, RPS14, RPL26, RPS19, RPS8, RPL19, RPL21, RPS9, RPL3, RPS20, RPSA, RPL27A, RPL41, RPL4, RPS27, RPL35, RPS13, RPL36, RPS28, RPS16, RPS15A, RPS27A
REACTOME_INFECTIOUS_DISEASE	1.77097e-08	5.01774e-08	0.733762	-2.46223	PSME1, NPM1, RPL24, RPL6, RPL37, RPL22, RPS24, RPS23, RPL36A, RPL23A, RPS3A, RPS25, RPL9, RNF213, RPL11, HSP90AB1, RPL17, ARPC3, PPIA, RPL14, RPL37A, RPS10, RPL34, RPS18, RPL30, RPL38, RPS17, RPL23, RPS6, RPS4X, RPL32, RPL35A, RPS3, RPL31, RPL5, RPS7, RPL39, RPL10A, RPL7, HNRNPK, RPS14, TUBA1B, RPL26, RPS19, RPS8, RPL19, RPL21, RPS9, RPL3, RPS20, RPSA, RPL27A, H2BC12, RPL41, RPL4, GNAS, RPS27, TX…
REACTOME_ACTIVATION_OF_THE_MRNA_UPON_BINDING_OF_THE_CAP_BINDING_COMPLEX_AND_EIFS_AND_SUBSEQUENT_BINDING_TO_43S	0.000262576	0.00070481	0.498493	-2.0124	RPS24, RPS23, RPS3A, RPS25, RPS10, RPS18, RPS17, RPS6, EIF4B, RPS4X, RPS3, PABPC1, RPS7, RPS14, RPS19, RPS8, RPS9, RPS20, RPSA, RPS27, RPS13, RPS28, RPS16, RPS15A, RPS27A
REACTOME_CELLULAR_RESPONSES_TO_EXTERNAL_STIMULI	0.000354174	0.000903143	0.498493	-1.87541	PSME1, RPL24, RPL6, RPL37, RPL22, RPS24, RPS23, RPL36A, RPL23A, RPS3A, RPS25, H1-4, ATM, RPL9, RPL11, HSP90AB1, RPL17, RPL14, RPL37A, RPS10, RPL34, RPS18, RPL30, RPL38, RPS17, RPL23, RPS6, HSPA8, RPS4X, RPL32, RPL35A, RPS3, RPL31, RPL5, RPS7, RPL39, RPL10A, RPL7, RPS14, TUBA1B, RPL26, RPS19, RPS8, RPL19, EEF1A1, RPL21, RPS9, RPL3, RPS20, RPSA, RPL27A, H2BC12, RPL41, RPL4, RPS27, TXNIP, UBC, RPL35…
REACTOME_TRANSPORT_OF_SMALL_MOLECULES	0.00454248	0.0110317	0.407018	1.96791	HBA2, HBA1, HBB, UBB
REACTOME_VESICLE_MEDIATED_TRANSPORT	0.0174491	0.0404502	0.352488	1.68705	HBA2, HBA1, HBB, UBB

## Sheet: RocheT0vsT24
pathway	pval	padj	log2err	NES	leadingEdge
REACTOME_NONSENSE_MEDIATED_DECAY_NMD	3.30379e-16	7.60717e-14	1.0377	-2.80493	UPF2, RPL9, RPS25, RPL23, RPS23, RPL36A, RPL22, RPL11, RPL27A, RPS8, RPS3, RPL21, RPL30, RPS27A, RPL37, RPL17, RPS24, RPS17, RPS7, RPL26, GSPT1, RPL37A, RPL14, RPS18, RPL34, RPS27, RPL41, RPS12, RPL36AL, RPL24, RPS9, RPL8, RPS3A, RPS13, RPL23A, RPS6, RPS28, RPL35, RPS5, RPSA, RPL13A, RPL19, RPS20, RPL7, RPL38, RPS15, RPL32, RPS15A, RPL10A, RPL18, RPL31, RPL36, RPL27, RPL35A, SMG1, RPS26, RPL7A, R…
REACTOME_RESPONSE_OF_EIF2AK4_GCN2_TO_AMINO_ACID_DEFICIENCY	3.99326e-16	7.60717e-14	1.0377	-2.8356	RPL9, RPS25, ATF4, RPL23, RPS23, RPL36A, RPL22, EIF2S2, RPL11, RPL27A, RPS8, RPS3, RPL21, RPL30, RPS27A, RPL37, RPL17, RPS24, RPS17, RPS7, RPL26, RPL37A, RPL14, RPS18, RPL34, RPS27, RPL41, RPS12, RPL36AL, RPL24, RPS9, RPL8, RPS3A, RPS13, RPL23A, RPS6, RPS28, RPL35, RPS5, RPSA, RPL13A, RPL19, RPS20, RPL7, RPL38, RPS15, RPL32, RPS15A, RPL10A, RPL18, RPL31, RPL36, RPL27, RPL35A, RPS26, RPL7A, RPS10,…
REACTOME_EUKARYOTIC_TRANSLATION_ELONGATION	7.23499e-16	9.18843e-14	1.02767	-2.85936	RPL9, RPS25, RPL23, RPS23, RPL36A, RPL22, RPL11, RPL27A, RPS8, RPS3, RPL21, RPL30, RPS27A, RPL37, RPL17, RPS24, RPS17, RPS7, RPL26, RPL37A, RPL14, RPS18, RPL34, RPS27, RPL41, RPS12, RPL36AL, RPL24, RPS9, RPL8, RPS3A, RPS13, RPL23A, RPS6, RPS28, RPL35, RPS5, RPSA, RPL13A, EEF1D, EEF1B2, RPL19, RPS20, RPL7, RPL38, RPS15, RPL32, RPS15A, RPL10A, RPL18, RPL31, RPL36, RPL27, RPL35A, RPS26, RPL7A, RPS10…
REACTOME_RRNA_PROCESSING	2.66281e-15	2.02906e-13	1.00732	-2.79967	RPL9, RPS25, RPL23, RPS23, RPL36A, RPL22, RPL11, RPL27A, RPS8, RPS3, RPL21, RPL30, RPS27A, RPL37, RIOK3, RPL17, RPS24, NCL, RPS17, RPS7, RPL26, RPL37A, RPL14, RPS18, RPL34, RPS27, RPL41, RPS12, RPL36AL, RPL24, RPS9, RPL8, RPS3A, RPS13, RPL23A, RPS6, RPS28, RPL35, RPS5, RPSA, RPL13A, RPL19, RPS20, RPL7, RPL38, RPS15, RPL32, RPS15A, RPL10A, RPL18, RPL31, RPL36, RPL27, RPL35A, RPS26, RPL7A, RPS10, R…
REACTOME_SELENOAMINO_ACID_METABOLISM	2.15681e-15	2.02906e-13	1.00732	-2.82602	RPL9, RPS25, RPL23, RPS23, RPL36A, RPL22, RPL11, RPL27A, RPS8, RPS3, RPL21, RPL30, RPS27A, RPL37, RPL17, RPS24, RPS17, RPS7, RPL26, RPL37A, RPL14, RPS18, RPL34, RPS27, RPL41, RPS12, RPL36AL, RARS1, RPL24, RPS9, RPL8, RPS3A, RPS13, RPL23A, RPS6, RPS28, RPL35, RPS5, RPSA, RPL13A, SECISBP2, RPL19, RPS20, RPL7, RPL38, RPS15, RPL32, RPS15A, RPL10A, RPL18, RPL31, RPL36, RPL27, RPL35A, RPS26, RPL7A, RPS…
KEGG_RIBOSOME	3.89437e-15	2.47292e-13	0.996986	-2.78024	RPL9, RPS25, RPL23, RPS23, RPL36A, RPL22, RPL11, RPL27A, RPS8, RPS3, RPL21, RPL30, RPS27A, RPL37, RPL17, RPS24, RPS17, RPS7, RPL26, RPL37A, RPL14, RPS18, RPL34, RPS27, RPL41, RPS12, RPL36AL, RPL24, RPS9, RPL8, RPS3A, RPS13, RPL23A, RPS6, RPS28, RPL35, RPS5, RPSA, RPL13A, RPL19, RPS20, RPL7, RPL38, RPS15, RPL32, RPS15A, RPL10A, RPL18, RPL31, RPL36, RPL27, RPL35A, RPS26, RPL7A, RPS10, RPL12, RPS11,…
REACTOME_EUKARYOTIC_TRANSLATION_INITIATION	5.0748e-14	2.76214e-12	0.965328	-2.66858	EIF3J, RPL9, RPS25, RPL23, RPS23, RPL36A, RPL22, EIF2S2, RPL11, RPL27A, RPS8, RPS3, RPL21, RPL30, RPS27A, RPL37, RPL17, EIF3A, RPS24, RPS17, RPS7, RPL26, RPL37A, RPL14, RPS18, RPL34, RPS27, RPL41, RPS12, RPL36AL, RPL24, RPS9, RPL8, RPS3A, RPS13, RPL23A, RPS6, RPS28, RPL35, RPS5, RPSA, RPL13A, RPL19, RPS20, RPL7, RPL38, RPS15, RPL32, RPS15A, RPL10A, RPL18, RPL31, RPL36, RPL27, RPL35A, RPS26, RPL7A…
REACTOME_CELLULAR_RESPONSE_TO_STARVATION	1.59446e-13	7.59361e-12	0.943632	-2.65343	RPL9, RPS25, ATF4, RPL23, RPS23, FNIP1, RPL36A, RPL22, EIF2S2, RPL11, RPL27A, RPS8, RHEB, RPS3, RPL21, RPL30, RPS27A, RPL37, RPL17, RPS24, RPS17, RPS7, RPL26, RPL37A, RPL14, RPS18, RPL34, RPS27, RPL41, RPS12, RPL36AL, RPL24, RPS9, RPL8, RPS3A, RPS13, RPL23A, RPS6, RPS28, RPL35, RPS5, RPSA, RPL13A, RPL19, RPS20, RPL7, RPL38, RPS15, RPL32, RPS15A, RPL10A, RPL18, RPL31, RPL36, RPL27, RPL35A, RPS26, …
REACTOME_SRP_DEPENDENT_COTRANSLATIONAL_PROTEIN_TARGETING_TO_MEMBRANE	4.48066e-12	1.89681e-10	0.887075	-2.62779	RPL9, RPS25, RPL23, RPS23, RPL36A, RPL22, RPL11, RPL27A, RPS8, RPS3, RPL21, RPL30, RPS27A, RPL37, RPL17, RPS24, RPS17, RPS7, RPL26, RPL37A, RPL14, RPS18, RPL34, RPS27, RPL41, RPS12, RPL36AL, RPL24, RPS9, RPL8, RPS3A, RPS13, RPL23A, RPS6, RPS28, RPL35, RPS5, RPSA, RPL13A, RPL19, RPS20, RPL7, RPL38, RPS15, RPL32, RPS15A, RPL10A, RPL18, RPL31, RPL36, RPL27, RPL35A, RPS26, RPL7A, RPS10, RPL12, RPS11,…
REACTOME_INFLUENZA_INFECTION	8.57204e-12	3.26595e-10	0.875325	-2.51028	NUP54, RPL9, POLR2A, RPS25, RPL23, RPS23, RPL36A, RPL22, RANBP2, RPL11, RPL27A, RPS8, DNAJC3, RPS3, RPL21, RPL30, RPS27A, RPL37, RPL17, XPO1, RPS24, RPS17, RPS7, RPL26, RPL37A, RPL14, RPS18, RPL34, RPS27, RPL41, RPS12, RPL36AL, RPL24, RPS9, RPL8, CANX, RPS3A, RPS13, RPL23A, RPS6, RPS28, NUP50, RPL35, RPS5, RPSA, RPL13A, RPL19, RPS20, RPL7, RPL38, RPS15, RPL32, RPS15A, RPL10A, RPL18, RPL31, RPL36,…
REACTOME_REGULATION_OF_EXPRESSION_OF_SLITS_AND_ROBOS	1.01161e-11	3.50385e-10	0.875325	-2.51546	UPF2, RPL9, RPS25, RPL23, RPS23, RPL36A, RPL22, RPL11, RPL27A, RPS8, RPS3, RPL21, RPL30, RPS27A, RPL37, RPL17, RPS24, RPS17, RPS7, RPL26, GSPT1, RPL37A, RPL14, RPS18, RPL34, RPS27, RPL41, RPS12, RPL36AL, RPL24, RPS9, RPL8, RPS3A, RPS13, RPL23A, RPS6, RPS28, RPL35, RPS5, RPSA, RPL13A, RPL19, RPS20, RPL7, RPL38, RPS15, RPL32, RPS15A, RPL10A, RPL18, RPL31, RBX1, RPL36, RPL27, RPL35A, RPS26, RPL7A, R…
REACTOME_TRANSLATION	1.20317e-11	3.82006e-10	0.875325	-2.41497	EIF3J, RPL9, RPS25, RPL23, RPS23, RPL36A, RPL22, EIF2S2, RPL11, RPL27A, RPS8, RPS3, RPL21, RPL30, RPS27A, RPL37, RPL17, EIF3A, RPS24, RPS17, RPS7, RPL26, GSPT1, RPL37A, RPL14, RPS18, RPL34, RPS27, RPL41, RPS12, RPL36AL, RARS1, RPL24, RPS9, RPL8, RPS3A, RPS13, RPL23A, RPS6, RPS28, RPL35, RPS5, RPSA, RPL13A, EEF1D, EEF1B2, RPL19, RPS20, RPL7, RPL38, RPS15, RPL32, RPS15A, RPL10A, RPL18, RPL31, RPL36…
REACTOME_METABOLISM_OF_RNA	8.19187e-11	2.40085e-09	0.839089	-2.22717	UPF2, NUP54, RPL9, TUT4, POLR2A, RPS25, SRSF4, RPL23, RPS23, RPL36A, RPL22, RANBP2, RPL11, RPL27A, RPS8, RPS3, HNRNPA1, RPL21, RPL30, RPS27A, ZC3H11A, RPL37, RIOK3, RPL17, XPO1, RPS24, NCL, RPS17, RPS7, RPL26, GSPT1, HNRNPM, RPL37A, RPL14, RPS18, RPL34, RPS27, RPL41, RPS12, RPL36AL, RPL24, RPS9, RPL8, RPS3A, RPS13, RPL23A, FUS, SET, RPS6, RPS28, NUP50, RPL35, RPS5, RPSA, RPL13A, CLNS1A, CCAR1, DD…
REACTOME_NEUTROPHIL_DEGRANULATION	1.66948e-10	4.54338e-09	0.826657	2.13682	SERPINA1, CST3, CPPED1, FCN1, FGR, GRN, FCER1G, CTSD, HSPA1A, S100A12, GLIPR1, LYZ, CYBA, ADGRE5, TYROBP, S100A9, FGL2, C5AR1, SLC11A1, ITGAX, GSTP1, CD14, CDA, MIF, RNASET2, CYBB, ANPEP, CTSS, CMTM6, S100A8, CTSB, COTL1, ITGAM, FCGR2A, MME, MGAM, PSMD13, DEFA1, RAB27A, FPR1, LTA4H, MAPK1, CD55, PSAP, ALOX5, LAMP2, QPCT, PTPRC, RAC1, ATP6V0C, XRCC6, CD44, ITGB2, CD68, CXCR2, GCA, SERPINB1, ITGAL,…
REACTOME_INNATE_IMMUNE_SYSTEM	1.97733e-10	5.02242e-09	0.826657	1.95632	SERPINA1, CST3, CPPED1, FCN1, FGR, GRN, FCER1G, CTSD, HSPA1A, S100A12, GLIPR1, LYZ, CYBA, ADGRE5, TYROBP, S100A9, FGL2, GNLY, C5AR1, SLC11A1, ITGAX, CASP8, GSTP1, CD14, MYO5A, CDA, MIF, RNASET2, CYBB, CLEC7A, ANPEP, CTSS, PSMD4, CMTM6, S100A8, CTSB, COTL1, ITGAM, CLEC4E, FCGR2A, NCF2, MME, MGAM, PSMD13, ATP6V0B, DEFA1, MAP2K4, RAB27A, FPR1, PELI1, LTA4H, CNPY3, FCGR3A, MAPK1, CD55, PSAP, ALOX5, L…
REACTOME_METABOLISM_OF_AMINO_ACIDS_AND_DERIVATIVES	2.19106e-10	5.21747e-09	0.826657	-2.37126	GLS, RPL9, RPS25, RPL23, RPS23, RPL36A, RPL22, RPL11, RPL27A, RPS8, RPS3, RPL21, RPL30, RPS27A, RPL37, RPL17, RPS24, RPS17, RPS7, RPL26, RPL37A, RPL14, RPS18, RPL34, RPS27, RPL41, RPS12, RPL36AL, RARS1, RPL24, RPS9, RPL8, RPS3A, RPS13, RPL23A, RPS6, RPS28, RPL35, RPS5, RPSA, RPL13A, SECISBP2, RPL19, AZIN1, RPS20, RPL7, RPL38, RPS15, RPL32, RPS15A, RPL10A, RPL18, RPL31, RPL36, RPL27, RPL35A, RPS26…
REACTOME_SIGNALING_BY_ROBO_RECEPTORS	3.34849e-10	7.50455e-09	0.814036	-2.32306	UPF2, RPL9, RPS25, RPL23, RPS23, RPL36A, RPL22, RPL11, RPL27A, RPS8, RPS3, RPL21, RPL30, RPS27A, RPL37, RPL17, RPS24, RPS17, RPS7, RPL26, GSPT1, RPL37A, RPL14, RPS18, RPL34, RPS27, RPL41, RPS12, RPL36AL, RPL24, RPS9, RPL8, RPS3A, RPS13, RPL23A, RPS6, RPS28, RPL35, RPS5, RPSA, RPL13A, RPL19, RPS20, RPL7, RPL38, RPS15, RPL32, RPS15A, RPL10A, RPL18, RPL31, RBX1, RPL36, RPL27, RPL35A, RPS26, RPL7A, R…
REACTOME_DEVELOPMENTAL_BIOLOGY	4.7405e-09	1.0034e-07	0.761461	-1.96888	UPF2, RPL9, ACVR2A, ITGB1, POLR2A, RPS25, RPL23, H2BC8, RPS23, LEF1, DEK, RPL36A, RANBP9, RPL22, RPL11, RPL27A, H2BC9, RPS8, H4C2, RPS3, RPL21, RPL30, RPS27A, RPL37, RPL17, RPS24, RPS17, RPS7, RPL26, GSPT1, PTK2, H4-16, SPTAN1, RPL37A, RPL14, RPS18, RPL34, RPS27, RPL41, RPS12, RPL36AL, AP2B1, RPL24, RPS9, RPL8, ROCK1, SUZ12, RPS3A, RPS13, TUBB1, RPL23A, H4C8, CHD9, RPS6, H2BC5, RPS28, RPL35, RPS5…
REACTOME_CELLULAR_RESPONSES_TO_EXTERNAL_STIMULI	1.68306e-08	3.37497e-07	0.733762	-1.94963	NUP54, RB1, ACTR10, RPL9, CUL3, RPS25, ATF4, RPL23, MAP4K4, H2BC8, RPS23, FNIP1, RPL36A, RPL22, RANBP2, EIF2S2, RPL11, RPL27A, H2BC9, RPS8, RHEB, EIF2AK1, H4C2, RPS3, RPL21, RPL30, RPS27A, RPL37, RPL17, XPO1, RPS24, RPS17, RPS7, RPL26, H4-16, RPL37A, RPL14, RPS18, RPL34, H1-3, RPS27, RPL41, RPS12, RPL36AL, RPL24, RPS9, CDC27, HBA1, RPL8, SUZ12, COX4I1, RPS3A, RPS13, COX7C, TUBB1, RPL23A, H4C8, MA…
REACTOME_NERVOUS_SYSTEM_DEVELOPMENT	1.65134e-07	3.1458e-06	0.690132	-1.98972	UPF2, RPL9, ITGB1, RPS25, RPL23, RPS23, RPL36A, RANBP9, RPL22, RPL11, RPL27A, RPS8, RPS3, RPL21, RPL30, RPS27A, RPL37, RPL17, RPS24, RPS17, RPS7, RPL26, GSPT1, PTK2, SPTAN1, RPL37A, RPL14, RPS18, RPL34, RPS27, RPL41, RPS12, RPL36AL, AP2B1, RPL24, RPS9, RPL8, ROCK1, RPS3A, RPS13, TUBB1, RPL23A, RPS6, RPS28, RPL35, RPS5, RPSA, RPL13A, ARHGEF12, RPL19, PTPN11, RPS20, DNM3, RPL7, MYL12A, RPL38, RPS15…
REACTOME_ACTIVATION_OF_THE_MRNA_UPON_BINDING_OF_THE_CAP_BINDING_COMPLEX_AND_EIFS_AND_SUBSEQUENT_BINDING_TO_43S	2.32485e-05	0.000421794	0.57561	-2.13289	EIF3J, RPS25, RPS23, EIF2S2, RPS8, RPS3, RPS27A, EIF3A, RPS24, RPS17, RPS7, RPS18, RPS27, RPS12, RPS9, RPS3A, RPS13, RPS6, RPS28, RPS5, RPSA, RPS20, RPS15, RPS15A, RPS26, RPS10, RPS11
REACTOME_CELL_CYCLE	9.59299e-05	0.00166133	0.538434	-1.70984	PCNT, NUP54, SMARCA5, RB1, PPP1R12A, ATRX, ITGB3BP, POLR2A, WAPL, NCAPG, HAUS1, H2BC8, RANBP2, H2BC9, SUMO1, H4C2, CDC14A, RPS27A, CEP70, XPO1, TAOK1, H4-16, ORC4, PCM1, AKAP9, RPS27, STAG2, NIPBL, CDC27, AHCTF1, MLH3, TUBB1, H4C8, PPP1CB, SET, KIF2A, H2BC5, NPM1, NUP50, KNTC1, H2BC10, DYNC1H1, RBBP4, HSP90AB1, TUBA1A, RBX1, RBL2, RBL1, VRK1, TINF2, SYNE2, STAG1, PPP2R5C, CLASP1, SMC1A, PPP6C, NE…
REACTOME_CELL_CYCLE_MITOTIC	0.000127482	0.00211177	0.518848	-1.75752	PCNT, NUP54, RB1, PPP1R12A, ITGB3BP, WAPL, NCAPG, HAUS1, H2BC8, RANBP2, H2BC9, SUMO1, H4C2, CDC14A, RPS27A, CEP70, XPO1, TAOK1, H4-16, ORC4, PCM1, AKAP9, RPS27, STAG2, NIPBL, CDC27, AHCTF1, TUBB1, H4C8, PPP1CB, SET, KIF2A, H2BC5, NUP50, KNTC1, H2BC10, DYNC1H1, RBBP4, HSP90AB1, TUBA1A, RBX1, RBL2, RBL1, VRK1, STAG1, PPP2R5C, CLASP1, SMC1A, NEK7, UBA52, H4C3, H2AZ1
REACTOME_INFECTIOUS_DISEASE	0.000219112	0.0034784	0.518848	-1.50269	TAF1, NUP54, RB1, RPL9, ITGB1, POLR2A, RPS25, RPL23, H2BC8, RPS23, RPL36A, RPL22, RANBP2, RPL11, RPL27A, H2BC9, RPS8, SUMO1, H4C2, DNAJC3, RPS3, RPL21, RPL30, RPS27A, RPL37, RPL17, XPO1, RPS24, RPS17, RPS7, RPL26, PTK2, H4-16, RPL37A, RPL14, RPS18, RPL34, RPS27, RPL41, RPS12, RPL36AL, BRK1, AP2B1, RPL24, RPS9, RPL8, ROCK1, SUZ12, CANX, RPS3A, RPS13, TUBB1, RPL23A, H4C8, MAP2K3, RPS6, H2BC5, RPS28…
REACTOME_M_PHASE	0.000277166	0.00422401	0.498493	-1.73999	PCNT, NUP54, RB1, ITGB3BP, WAPL, NCAPG, HAUS1, H2BC8, RANBP2, H2BC9, SUMO1, H4C2, RPS27A, CEP70, XPO1, TAOK1, H4-16, PCM1, AKAP9, RPS27, STAG2, NIPBL, CDC27, AHCTF1, TUBB1, H4C8, SET, KIF2A, H2BC5, NUP50, KNTC1
REACTOME_MITOTIC_PROMETAPHASE	0.000791928	0.0116048	0.477271	-1.89172	PCNT, ITGB3BP, WAPL, NCAPG, HAUS1, RANBP2, CEP70, XPO1, TAOK1, PCM1, AKAP9, RPS27, STAG2, AHCTF1, TUBB1, KIF2A, KNTC1, DYNC1H1, TUBA1A, STAG1, PPP2R5C, CLASP1, SMC1A, NEK7, YWHAE, CEP192
KEGG_LYSOSOME	0.00107207	0.0151281	0.45506	1.88035	AP1S2, CTSD, SLC11A1, CTSS, CTSB, ATP6V0B, PPT1, PSAP, LAMP2, ATP6V0C, CD68, AP1G1, ATP6V0D1, CD164
KEGG_HEMATOPOIETIC_CELL_LINEAGE	0.00126325	0.0171892	0.45506	1.92685	HLA-DRB1, CD14, ANPEP, ITGAM, MME, ITGA4, CSF3R, CD55, CD3E, CD44, CSF2RA, MS4A1
REACTOME_DNA_DOUBLE_STRAND_BREAK_RESPONSE	0.0022387	0.0294119	0.431708	-1.80259	SMARCA5, H2BC8, H2BC9, SUMO1, H4C2, RPS27A, H4-16, UBXN1, H4C8, H2BC5, H2BC10
REACTOME_IMMUNOREGULATORY_INTERACTIONS_BETWEEN_A_LYMPHOID_AND_A_NON_LYMPHOID_CELL	0.00350335	0.0444925	0.431708	1.75702	LILRA5, TYROBP, HCST, ITGA4, FCGR3A, TREM1, CD3E, JAML, HLA-F, ITGB2, KLRB1, PILRA, ITGAL, HLA-C, IFITM1, SELL, HLA-A, LILRA2
KEGG_NATURAL_KILLER_CELL_MEDIATED_CYTOTOXICITY	0.00413785	0.049604	0.407018	1.72035	FCER1G, TYROBP, HCST, NFAT5, IFNGR2, FCGR3A, MAPK1, PAK1, TNFRSF10C, RAC1, TNFSF10, ITGB2, ITGAL, HLA-C, RAF1, RAC2, IFNGR1, HLA-A
REACTOME_REGULATION_OF_PLK1_ACTIVITY_AT_G2_M_TRANSITION	0.00416622	0.049604	0.407018	-1.73637	PCNT, PPP1R12A, HAUS1, RPS27A, CEP70, PCM1, AKAP9, PPP1CB, DYNC1H1, TUBA1A, CLASP1, UBA52, YWHAE, CEP192, SKP1

## Sheet: RocheT0vsT72
pathway	pval	padj	log2err	NES	leadingEdge
REACTOME_NEUTROPHIL_DEGRANULATION	2.80647e-05	0.00660044	0.57561	1.50645	CPPED1, ADGRE3, SERPINA1, HBB, GLIPR1, ANPEP, FPR1, S100A12, MME, MAPK1, S100A8, C5AR1, QPCT, CDA, ADGRE5, MNDA, S100A11, S100A9, MGAM, CXCR1, SELL, RAB27A, GCA, CXCR2, CYBA, FCGR2A, LGALS3, RAC1, FCER1G, S100P, FGL2, SLC11A1, LYZ, FCN1, FCGR3B, TYROBP, ITGAM, PTPRC, CTSS, CMTM6, HSPA1A, CST3, ITGAX, CTSD, FGR, ATP8A1, CD55, IGF2R, GMFG, GSTP1, GRN, CD14, CYBB, CTSB, ATP6V0C, ATP11B
REACTOME_RMTS_METHYLATE_HISTONE_ARGININES	4.16432e-05	0.00660044	0.557332	-2.55696	H4C2, H4-16, H4C8, H4C14, RPS2, ARID1A, SMARCA2, SMARCC1, H4C4, H4C5, H2AC8, H4C11, H4C3, H2AC20, H2AC6, H2AZ1, H3C10, H4C6
KEGG_CYTOKINE_CYTOKINE_RECEPTOR_INTERACTION	0.000106256	0.0112278	0.538434	1.90109	TNFSF10, IL2RG, CXCR1, CXCR2, CSF2RA, TNFRSF1A, CSF2RB, CSF3R, TNFRSF10C, TNFSF13B, IL10RA, IFNGR1, TGFBR2

[truncated: 11 more sheets: BiomatricaT0vsT24, PAXgeneT0vsT24, PAXgeneT0vsT72, EDTA.MIR0.2_T0vsT16_phase2, EDTA.CCF2_T0vsT16_phase2, Citrate.MIR0.2_T0vsT16_phase2, Citrate.CCF2_T0vsT16_phase2, Serum.MIR0.2_T0vsT4_phase2, Serum.MIR0.2_T0vsT16_phase2, Serum.CCF2_T0vsT4_phase2, Serum.CCF2_T0vsT16_phase2]
